# Supplementary material for: Mutual information based stock networks and portfolio selection for intraday traders using high frequency data: An Indian market case study
Source: PLoS One. 2019 Aug 29;14(8):e0221910. doi: 10.1371/journal.pone.0221910 (PMC6715228; doi:10.1371/journal.pone.0221910)
Supplement: S4 Table — (XLSX) [file pone.0221910.s011.xlsx]

## Sheet: Stocks
Id	Label	Category
1	ABB	INDUSTRIAL MANUFACTURING
2	ACC	CEMENT & CEMENT PRODUCTS
3	ADANIPORTS	SERVICES
4	AMBUJACEM	CEMENT & CEMENT PRODUCTS
5	ASHOKLEY	AUTOMOBILE
6	ASIANPAINT	CONSUMER GOODS
7	AUROPHARMA	PHARMA
8	AXISBANK	FINANCIAL SERVICES
9	BAJAJ-AUTO	AUTOMOBILE
10	BAJFINANCE	FINANCIAL SERVICES
11	BAJAJFINSV	FINANCIAL SERVICES
12	BANKBARODA	FINANCIAL SERVICES
13	BEL	INDUSTRIAL MANUFACTURING
14	BHEL	INDUSTRIAL MANUFACTURING
15	BPCL	ENERGY
16	BHARTIARTL	TELECOM
17	INFRATEL	TELECOM
18	BOSCHLTD	AUTOMOBILE
19	BRITANNIA	CONSUMER GOODS
20	CADILAHC	PHARMA
21	CIPLA	PHARMA
22	COALINDIA	METALS
23	COLPAL	CONSUMER GOODS
24	CONCOR	SERVICES
25	CUMMINSIND	INDUSTRIAL MANUFACTURING
26	DLF	CONSTRUCTION
27	DABUR	CONSUMER GOODS
28	DIVISLAB	PHARMA
29	EICHERMOT	AUTOMOBILE
30	EMAMILTD	CONSUMER GOODS
31	GAIL	ENERGY
32	GSKCONS	CONSUMER GOODS
33	GLAXO	PHARMA
34	GLENMARK	PHARMA
35	GODREJCP	CONSUMER GOODS
36	GRASIM	CEMENT & CEMENT PRODUCTS
37	HCLTECH	IT
38	HDFCBANK	FINANCIAL SERVICES
39	HAVELLS	CONSUMER GOODS
40	HEROMOTOCO	AUTOMOBILE
41	HINDALCO	METALS
42	HINDPETRO	ENERGY
43	HINDUNILVR	CONSUMER GOODS
44	HINDZINC	METALS
45	HDFC	FINANCIAL SERVICES
46	ITC	CONSUMER GOODS
47	ICICIBANK	FINANCIAL SERVICES
48	IDEA	TELECOM
49	IBULHSGFIN	FINANCIAL SERVICES
50	IOC	ENERGY
51	INDUSINDBK	FINANCIAL SERVICES
52	INFY	IT
53	KOTAKBANK	FINANCIAL SERVICES
54	LICHSGFIN	FINANCIAL SERVICES
55	LT	CONSTRUCTION
56	LUPIN	PHARMA
57	M&M	AUTOMOBILE
58	MARICO	CONSUMER GOODS
59	MARUTI	AUTOMOBILE
60	MOTHERSUMI	AUTOMOBILE
61	NMDC	METALS
62	ONGC	ENERGY
63	OIL	ENERGY
64	OFSS	IT
65	PETRONET	ENERGY
66	PIDILITIND	CHEMICALS
67	PEL	PHARMA
68	PFC	FINANCIAL SERVICES
69	POWERGRID	ENERGY
70	PNB	FINANCIAL SERVICES
71	RELIANCE	ENERGY
72	SHREECEM	CEMENT & CEMENT PRODUCTS
73	SIEMENS	INDUSTRIAL MANUFACTURING
74	SAIL	METALS
75	SUNPHARMA	PHARMA
76	TCS	IT
77	TATAMTRDVR	AUTOMOBILE
78	TATAMOTORS	AUTOMOBILE
79	TATAPOWER	ENERGY
80	TATASTEEL	METALS
81	TECHM	IT
82	TITAN	CONSUMER GOODS
83	TORNTPHARM	PHARMA
84	UPL	FERTILISERS & PESTICIDES
85	ULTRACEMCO	CEMENT & CEMENT PRODUCTS
86	UBL	CONSUMER GOODS
87	MCDOWELL-N	CONSUMER GOODS
88	WIPRO	IT
89	YESBANK	FINANCIAL SERVICES

## Sheet: Fig1
Correlation
Jan-Feb 2014	Mar-May 2014	Jun-Dec 2014
0.0247568	0.0064951	0.0158202
0.0160938	0.0251574	0.0177252
0.0146035	0.0246387	0.0163752
0.00347463	0.0111701	0.0228988
0.0222779	0.0200771	0.00685675
0.0183971	0.00849582	0.0120592
0.0238333	0.0232542	0.0147063
0.00989139	0.0113855	0.00836631
0.00717892	0.0014593	0.0137996
0.00896174	-0.00197208	0.010249
0.0183019	0.031232	0.0200375
0.00300779	0.0192482	0.0157229
0.0177355	0.0306957	0.0172302
0.000303024	0.025758	0.00927401
0.0166842	0.0169692	0.00665281
-0.00459991	-0.00244178	0.0092323
0.0103769	0.00182065	0.00218221
0.000119896	0.00530706	0.0111459
0.0168075	0.0174606	0.00546365
0.0149125	0.00845059	0.0139518
0.00326501	0.0292827	0.017914
0.011321	0.00969364	0.00920178
0.00789161	0.0126762	0.00950491
0.0145443	-0.00190078	0.0112656
0.0104294	0.0238523	0.0153316
0.00761637	0.012676	0.00869159
0.0111955	0.0134428	0.00801503
-0.00236156	0.00994365	0.0097339
0.00215587	0.0109481	0.00776473
0.0234668	0.0232525	0.00522418
0.014713	0.00101811	0.00804551
0.00283953	0.000263895	0.00887936
0.00799612	0.00955274	0.0149915
0.00400926	-0.00435456	0.00619867
0.0152577	-0.00485248	0.0115468
0.00689248	0.0106017	-0.00122026
0.00708322	0.0114908	0.00627652
0.0020358	0.0193337	0.0178099
0.00686656	0.00917212	0.0138313
0.017545	0.0228392	0.0135803
0.00403227	0.0113414	0.00680182
0.0175157	0.0170902	0.00478057
0.0160572	0.0149629	0.00876878
0.0236927	0.0275594	0.00406933
0.0167662	0.0122621	0.000763212
0.020507	0.0176321	0.0188801
0.0253971	0.0157526	0.0133614
0.00991592	0.00754494	0.00472633
0.00257432	0.0110218	0.00961171
0.0159066	0.0210466	0.0136541
0.0178768	0.0160567	0.00693844
0.0161324	0.0252498	0.00998665
0.0261077	0.0323964	0.0119823
0.0112193	0.0340761	0.0175205
0.00643199	0.00974941	0.0102195
0.00628052	0.00307454	0.00705242
-0.00304059	-0.00996467	-0.00185823
0.0180555	0.0155127	0.0135652
0.00814271	0.0163804	0.0138533
0.00388266	0.0174053	0.0175582
0.0178954	0.0166422	0.0150883
0.0020205	0.00430576	0.00534898
0.0177079	-0.00281042	0.00133288
0.0111614	0.00807197	0.0146481
0.00860115	0.00622507	0.00687531
0.00317963	0.00245436	0.00967745
0.00970572	0.033108	0.0166787
0.0159928	0.0285374	0.00892922
0.0231245	0.0236571	0.0176429
0.0182241	0.0223325	0.0140937
0.00878425	0.00108787	0.00384394
0.0696305	0.0957713	0.0416873
0.0158471	0.0287063	0.0144235
0.0124153	0.0246378	0.00950947
0.0193177	0.0205394	-0.00181536
0.00301006	0.0255009	0.0198081
0.0125083	0.0184706	0.0142909
0.0113116	0.0333636	0.0170273
0.0169309	0.0268294	0.0194508
0.0123004	0.00257932	0.0106737
0.00216871	0.0180616	0.0114869
0.0013433	0.00777372	0.00127526
0.00403488	0.0200196	0.0146337
0.0115971	0.0154612	0.0139638
0.00119124	0.00164	0.00774732
0.0149274	0.0168469	0.00841272
0.00739908	0.0222989	0.00798654
0.0251918	0.0282652	0.0176543
0.0437233	0.0924337	0.116804
0.120972	0.171198	0.173481
0.0132008	0.0603458	0.100398
0.0723654	0.0744813	0.0725917
0.0567685	0.0461388	0.0752491
0.111596	0.121557	0.133139
0.0518108	0.0670318	0.0653783
0.00576782	0.00329739	0.00372072
-0.000896091	0.00418444	0.00735405
0.110656	0.13828	0.136654
0.00517161	0.0106112	0.0268639
0.0828415	0.0950332	0.122344
0.0522263	0.0689384	0.100651
0.0677928	0.0837985	0.0772097
0.00394832	0.0121977	0.0160414
0.00724152	-0.000501879	0.00815849
0.00102242	-0.000116833	0.0135089
0.00384981	0.000618854	-0.000263809
0.0694573	0.0626237	0.0727921
0.0502695	0.0744766	0.093162
0.0276937	0.0164852	0.0338411
0.00396294	0.016174	0.0138903
0.0179041	0.0155948	0.0145322
0.102751	0.116374	0.117179
0.0219533	0.0171556	0.0360194
0.0323931	0.0180657	0.0324369
0.00264789	0.0228397	0.0263069
0.0108994	0.00750031	0.0103173
0.0643548	0.0578948	0.0690507
-0.0011668	0.00637704	0.00658601
0.00669998	0.00952345	0.00688931
0.0140677	0.0246083	0.0416599
0.0122962	0.00385865	0.0104647
0.0696297	0.0771782	0.0772245
0.0599589	0.0475162	0.0520545
0.0797515	0.0941184	0.0991294
0.0311805	0.0344109	0.0568528
0.049972	0.0668527	0.0727225
0.088541	0.0965311	0.102573
0.0447015	0.0547851	0.0978981
0.0703773	0.060257	0.0661443
0.031173	0.0515568	0.0690808
0.0837083	0.0872028	0.0976431
0.0779223	0.0644999	0.0660943
0.122541	0.114215	0.138697
0.0468676	0.0668148	0.0707665
0.0058256	0.0222646	0.0220554
0.0318446	0.0578311	0.0822371
0.100529	0.103297	0.100623
0.0701491	0.0518714	0.0667822
0.0882843	0.101394	0.0949008
0.0804557	0.094398	0.117522
0.102617	0.0984193	0.138235
0.0637467	0.0372591	0.0661701
0.0725709	0.0721623	0.0822035
0.00592027	-0.00629975	0.00457108
0.064474	0.0802176	0.077267
0.0112895	0.0265102	0.0394189
0.0400951	0.0825197	0.0874775
0.0850904	0.0835326	0.108233
0.0212176	0.00756329	0.0239227
0.0285526	0.0124529	0.0134805
0.0304651	0.0420702	0.061933
0.00797697	0.0183532	0.00636274
-0.00142541	0.00879261	0.00909703
0.0899527	0.114132	0.130896
0.0358012	0.0814877	0.0800685
0.117051	0.130498	0.132513
0.103419	0.126379	0.12973
1.33189e-05	0.00511166	0.0117764
0.0350277	0.0464985	0.0705479
0.0685751	0.100883	0.107987
0.0732792	0.0477874	0.083697
0.0644761	0.0509783	0.0717729
0.0455503	0.0747208	0.0900189
0.0769747	0.0951008	0.116101
0.0674525	0.0830766	0.104067
0.114276	0.126609	0.140037
0.0624587	0.0391922	0.0552185
0.0366876	0.0538121	0.0584374
-0.00126184	0.00746183	0.0124641
0.0307444	0.0583236	0.0819174
0.0691016	0.0943512	0.093703
0.0276612	0.00588645	0.0243381
0.0538247	0.0429266	0.0318908
0.0548949	0.050423	0.0609328
0.110517	0.132961	0.138224
0.0521056	0.0982335	0.140033
0.0238725	0.0739698	0.153935
0.0414976	0.0836113	0.100878
0.053505	0.112041	0.128198
0.0848207	0.177875	0.223242
0.03662	0.0699519	0.0851952
0.00310474	0.00789603	0.0101741
0.0050694	0.00303364	0.019301
0.0917071	0.200943	0.227147
0.00748091	0.027115	0.0270231
0.07141	0.153017	0.20643
0.0489758	0.102638	0.144814
0.0474351	0.120526	0.118653
0.0102016	-0.00634389	0.0239826
-0.0017777	0.00268939	0.00827501
0.00638403	-0.00899302	0.0190623
0.0118337	0.00691002	0.00809639
0.0519466	0.0611862	0.0942861
0.032634	0.113623	0.140243
0.0265113	0.0214817	0.0372619
0.0107523	0.0114382	0.0176236
0.00907425	0.0110635	0.0229443
0.087842	0.189983	0.208213
0.0257108	0.0485512	0.0536663
0.0233141	0.0221996	0.0490964
0.00994112	0.00703283	0.037864
-0.00244147	0.0108366	0.0103207
0.0318648	0.089224	0.0998167
0.000237726	0.0103945	0.00536701
0.0113817	0.0119608	0.00275206
0.0275375	0.0430771	0.0642451
0.0142774	0.0126268	0.0173216
0.0328724	0.0556045	0.0628868
0.0461455	0.0688181	0.0776347
0.061426	0.127144	0.170552
0.0333096	0.0655815	0.0932009
0.0509491	0.0577015	0.0867059
0.086431	0.128681	0.17335
0.0512273	0.113554	0.1571
0.0406141	0.0819563	0.0853871
0.0245911	0.0701104	0.100708
0.063496	0.120197	0.16518
0.0540203	0.0811808	0.0972165
0.0941314	0.174777	0.247471
0.0435361	0.128675	0.128807
0.00205305	0.0295118	0.0300329
0.031976	0.0859759	0.121617
0.0980602	0.153522	0.176167
0.0491869	0.0853167	0.109328
0.0772368	0.141926	0.154328
0.0786063	0.16722	0.199538
0.0893355	0.187751	0.223105
0.0423251	0.0647069	0.0931281
0.0641908	0.0777231	0.105943
-0.00640459	0.00636815	0.0114602
0.0427803	0.0859473	0.108485
-0.00206082	0.0270689	0.0598692
0.0397775	0.0948697	0.100314
0.0589236	0.122763	0.166498
0.0219085	0.02178	0.0264935
0.00402837	0.00892596	0.0198185
0.0252028	0.0582457	0.0826303
0.011442	0.00701917	0.00783796
0.00577449	0.0185492	0.010577
0.0878764	0.159712	0.225583
0.0410268	0.0836082	0.105716
0.090835	0.196097	0.228998
0.0879535	0.16615	0.207855
0.0013876	0.00355185	0.00964348
0.0446885	0.0798908	0.099914
0.0585978	0.164011	0.177974
0.0662329	0.0904406	0.126612
0.0518601	0.0878923	0.115048
0.0516241	0.109985	0.142162
0.0686474	0.13293	0.18225
0.0586211	0.128847	0.155827
0.0880418	0.183186	0.22309
0.0520365	0.0793907	0.0877756
0.0320682	0.0805635	0.0927032
0.00105071	0.0157302	0.0105231
0.0445274	0.108975	0.117473
0.0297289	0.0629718	0.078487
0.0277831	0.016991	0.0303241
0.0513622	0.0562502	0.0476522
0.0561335	0.082888	0.0951067
0.0944191	0.213804	0.24904
0.017	0.0574835	0.111897
0.0685512	0.0842449	0.0904371
0.0705091	0.0604468	0.0956802
0.108623	0.121138	0.156296
0.0546701	0.0874411	0.0722421
-0.00762394	0.0146762	0.00560886
0.0109247	0.00304926	0.0140504
0.123721	0.152044	0.157285
0.0213323	-0.00367954	0.0221581
0.0864247	0.106223	0.142051
0.0743277	0.0866662	0.111385
0.0748104	0.0986008	0.0930383
0.0180041	0.00321731	0.0148761
0.0048891	0.00399459	0.0078991
0.00421977	0.00700101	0.0111303
0.00921948	8.72907e-06	0.00485295
0.0690306	0.0596107	0.0818075
0.0532925	0.0944141	0.107726
0.0286181	0.0262454	0.0323861
0.00292504	0.00367909	0.0150301
0.0104301	0.0152291	0.017411
0.112631	0.13444	0.139746
0.0483507	0.0256416	0.0448417
0.0263098	0.0271498	0.041985
0.00386	0.00601751	0.0228147
0.016187	-0.000328525	0.012716
0.065675	0.0871453	0.0842858
0.0178384	0.0036911	0.00839582
0.00121972	-0.000848184	0.00818504
0.0351188	0.0168272	0.0367123
0.0210623	0.0108564	0.014361
0.0574113	0.0780911	0.0816195
0.0623079	0.0664926	0.0600078
0.094787	0.102861	0.126042
0.045454	0.0473415	0.0725331
0.0481252	0.0849169	0.0739046
0.107927	0.0980074	0.123814
0.0556788	0.0801395	0.112445
0.0740974	0.0873311	0.0836576
0.0516429	0.0526678	0.0763739
0.109408	0.122388	0.125842
0.105283	0.12346	0.0891288
0.124114	0.13234	0.16037
0.063979	0.0849626	0.0885143
0.0195558	0.029421	0.0225554
0.0473084	0.0659722	0.0913556
0.116754	0.111873	0.120718
0.0786806	0.0861261	0.0823777
0.0965387	0.123874	0.107718
0.115764	0.120695	0.147133
0.114689	0.142567	0.156637
0.0621776	0.0614815	0.0738273
0.0764836	0.0967925	0.0954622
0.00290771	0.0104248	0.00845803
0.0872484	0.0758605	0.0898953
0.0168872	0.0114432	0.044758
0.0463178	0.0801193	0.0951044
0.0998005	0.115807	0.121884
0.0250123	-0.00222577	0.0289556
0.0164316	-0.00566201	0.0135409
0.0425637	0.0456853	0.0649839
0.0100559	0.0128781	0.0112616
0.0115692	0.0102938	0.00587413
0.0880593	0.128499	0.151654
0.0549981	0.0865525	0.0910375
0.112469	0.137781	0.158502
0.116957	0.1417	0.158965
0.00424605	0.00277251	0.00937987
0.0595454	0.0702128	0.0752043
0.0593491	0.112105	0.122499
0.0800388	0.0706703	0.0994952
0.0794431	0.0805174	0.0965187
0.0637237	0.0799296	0.0951607
0.0891936	0.11215	0.134532
0.0778042	0.0926723	0.124113
0.115963	0.146006	0.158058
0.0578162	0.0572261	0.0717388
0.0551419	0.0621086	0.0703659
0.016578	0.0133636	0.00701226
0.0384573	0.0582896	0.0927955
0.0921442	0.0939475	0.0956427
0.0494553	0.012517	0.0287471
0.0787452	0.0446355	0.0365748
0.0613664	0.0740785	0.0765155
0.129891	0.144928	0.16459
0.0164953	0.043536	0.0863605
0.0261382	0.042031	0.108935
0.0396916	0.108116	0.170836
0.0094933	0.044236	0.0745827
0.00302155	0.00268927	0.0146274
0.00714421	0.00921964	0.0100354
0.0414346	0.11264	0.171285
-0.000475692	0.00332805	0.0331205
0.0326539	0.0903982	0.152281
0.0221079	0.0622256	0.116565
0.0367309	0.0583839	0.0930139
0.00384806	-4.57956e-05	0.0186865
0.000801668	0.00272768	0.00695668
0.00735086	-0.00909775	0.0116107
0.00274742	-0.0053904	0.00607433
0.0207291	0.026323	0.0885375
0.0314429	0.0881932	0.10741
-7.39655e-05	0.0152227	0.0356164
0.00465442	0.00274476	0.0153043
-0.000320271	0.0109825	0.0168344
0.0493365	0.100302	0.154462
0.0157599	0.0198626	0.0492699
0.0142104	0.011381	0.0427433
0.000300676	0.00895963	0.0412551
0.00354788	0.00661433	0.0153788
0.0137728	0.0395545	0.0818075
0.00750222	0.00548688	0.000202416
0.00122929	-0.00482822	0.00979344
0.00436662	0.0270479	0.0550462
0.00974246	0.00922911	0.00781033
0.0130872	0.0310884	0.0584331
0.027965	0.0289715	0.0716084
0.0329049	0.0670871	0.12194
0.0169097	0.0350785	0.0820965
0.0156256	0.0328112	0.0833014
0.0359732	0.0716037	0.130485
0.0198157	0.0497841	0.121514
0.0196654	0.0361937	0.0670441
0.0180636	0.0517724	0.0848741
0.0308606	0.0662266	0.126926
0.034697	0.0369556	0.0779864
0.04706	0.0950318	0.175477
0.0243842	0.0577553	0.0990138
0.012231	0.0238206	0.0253243
0.0134967	0.0450332	0.104552
0.0465004	0.0806995	0.134887
0.0293429	0.038737	0.0888655
0.0265888	0.0781809	0.114657
0.0378679	0.0842916	0.161181
0.0403871	0.090193	0.171401
0.0206884	0.0339255	0.0661333
0.0207765	0.051979	0.0913785
-0.00180688	0.0136996	0.0124483
0.0269179	0.0628842	0.0955869
0.00937667	0.0233452	0.0613549
0.00965062	0.0762096	0.090506
0.0321057	0.0710971	0.127288
0.00933927	0.0164601	0.023348
0.0113962	0.00509597	0.0112928
0.0209657	0.0434129	0.083123
-0.00612305	0.00405389	0.01044
0.000260651	0.0157053	0.0141353
0.0322746	0.0987342	0.163825
0.00453669	0.045406	0.0946433
0.0365841	0.112743	0.181739
0.0350845	0.0861663	0.163297
0.00273413	0.00924337	0.00748285
0.0225751	0.05373	0.0873821
0.024727	0.0947589	0.14263
0.0243031	0.0466107	0.0977134
0.0341028	0.0342617	0.0911285
0.0154443	0.0596355	0.11919
0.0308133	0.0807863	0.156696
0.0219713	0.0707275	0.123726
0.0464153	0.103085	0.173349
0.0263536	0.0334006	0.0745634
0.0120905	0.044243	0.0780269
0.00601187	0.00374818	0.0145268
0.0103972	0.0675875	0.110054
0.0140064	0.0429982	0.0592797
0.0221712	0.00752265	0.0279425
0.0218672	0.0198255	0.0409709
0.0202062	0.0345904	0.0829489
0.044281	0.118198	0.184048
0.0612544	0.0584744	0.0697904
0.120141	0.102089	0.121846
0.0518647	0.0615992	0.0580069
-0.00178377	0.00717729	0.0142566
0.0134908	-0.00053472	0.00694886
0.11632	0.127297	0.116731
0.00936033	0.00229536	0.0165313
0.0856859	0.0942381	0.104493
0.0671641	0.0829028	0.0801213
0.0639159	0.0985207	0.0773428
0.0112437	0.006822	0.000658888
0.00671795	0.00665249	0.00447042
0.013982	0.00770769	0.00980634
0.0067199	-0.00326455	0.00509688
0.0730209	0.0576481	0.0692078
0.0613595	0.0875258	0.0827498
0.028526	0.00970739	0.0247722
0.000100165	0.0026451	0.00202027
-0.00270298	0.0129801	0.0109262
0.125886	0.103629	0.103784
0.0414536	0.0288879	0.0377992
0.0276373	0.0245003	0.0282007
0.000645116	-0.00389873	0.0279654
-0.000489881	0.00167479	0.0079408
0.065747	0.0695331	0.0634459
0.0032038	0.0216856	0.0121178
0.0139188	0.0216893	-0.000195266
0.0322565	0.0341651	0.0421057
0.0194575	0.0125122	0.00765308
0.0604467	0.061151	0.05649
0.0756576	0.0603582	0.0569272
0.114455	0.0910152	0.085325
0.0459736	0.0289657	0.0609421
0.0709355	0.0802607	0.0622412
0.105044	0.0955927	0.100555
0.0353579	0.0629352	0.0784104
0.078331	0.0835857	0.0619172
0.0367912	0.046565	0.0563372
0.10487	0.107052	0.0944819
0.123502	0.0919255	0.0769347
0.137269	0.0996654	0.122363
0.0547285	0.0645446	0.0664578
0.0124788	0.00712608	0.0190311
0.0517728	0.0452329	0.0668722
0.115355	0.0859739	0.0993656
0.0648972	0.0719989	0.0663905
0.116683	0.0978958	0.0820117
0.101336	0.0926742	0.108488
0.116553	0.109208	0.114941
0.0598343	0.06142	0.0641609
0.0699305	0.0762712	0.0691255
-0.002091	0.00724014	0.00981931
0.0627644	0.0762668	0.0666931
0.013007	0.00997343	0.0365285
0.0701825	0.0704063	0.0728912
0.11204	0.0835323	0.0946857
0.00927519	0.0152884	0.0121344
0.00679881	0.000648248	0.00967065
0.033135	0.044398	0.0457458
0.0124876	0.021186	0.0160953
-0.000403678	0.00738742	0.0100291
0.100691	0.0972723	0.113385
0.0504845	0.0639773	0.0683316
0.125585	0.119209	0.117785
0.113934	0.115527	0.114426
-0.000402605	0.0014833	0.00668273
0.0573152	0.0443392	0.0538518
0.0680576	0.0861227	0.0928738
0.0853977	0.0655687	0.0798253
0.0717325	0.0708839	0.076186
0.0545017	0.0564846	0.0728129
0.0963217	0.0952476	0.10652
0.0779656	0.0801406	0.0865391
0.117129	0.1144	0.133445
0.05211	0.0505637	0.0600346
0.0512973	0.0404319	0.0511038
0.0142934	0.00358159	0.0100049
0.0448782	0.0651568	0.0668367
0.0717569	0.0681115	0.0628119
0.0409589	0.0273943	0.0273781
0.0602156	0.0496083	0.0300291
0.0636312	0.0715392	0.0507793
0.122835	0.107633	0.122531
0.162214	0.141136	0.147822
0.052122	0.0473888	0.0567235
-0.00311936	0.000285603	0.00966815
0.0196798	-0.00120319	0.0108169
0.179192	0.150951	0.144802
-0.00236271	0.00603509	0.0251862
0.105057	0.105213	0.131793
0.0771327	0.0657198	0.097643
0.0838228	0.0819713	0.0762292
0.00228603	0.00536192	0.00726256
0.00758375	-0.00758208	0.00842735
-0.00158453	-0.0125198	0.00935566
0.0118096	0.0164555	0.00525864
0.0995432	0.0720905	0.0950549
0.0600754	0.0640141	0.0909854
0.0268637	0.0217428	0.0320295
0.00545453	0.000761162	0.00861303
0.00130906	0.00583851	0.0130951
0.171219	0.142095	0.133734
0.0327144	0.0374996	0.0363548
0.0497642	0.0262268	0.0555866
-0.00378223	0.00102705	0.0287241
0.0072066	-0.000781867	0.0036648
0.051384	0.060045	0.065069
0.0026951	0.00911492	0.00751809
0.0159317	0.00497295	0.0077134
0.0326531	0.0433302	0.0624676
0.00513861	0.00136912	0.00551642
0.0423273	0.0346652	0.0441088
0.0925119	0.0542637	0.0579579
0.108517	0.103532	0.101803
0.054189	0.0345246	0.065328
0.0574799	0.045336	0.0633579
0.126874	0.09362	0.106461
0.0477746	0.0792414	0.103964
0.0648644	0.077442	0.0637776
0.0431174	0.0421646	0.06217
0.112446	0.091231	0.103533
0.0996638	0.0673463	0.0708154
0.167983	0.137	0.15499
0.0708955	0.0965116	0.0874606
0.0055198	0.0151216	0.0166453
0.0470816	0.0614145	0.0808657
0.156239	0.108591	0.116905
0.0935957	0.0619272	0.0752204
0.113924	0.0981053	0.0956625
0.133113	0.124099	0.141126
0.148086	0.106519	0.139749
0.0982464	0.0733746	0.0848684
0.0738479	0.0650972	0.0738761
0.00146401	0.00380423	0.00228269
0.0810628	0.0654097	0.0674188
0.0167881	0.00601567	0.0434517
0.0390779	0.0535716	0.0718924
0.0983662	0.0838541	0.10977
0.0163663	0.0101641	0.0100904
0.0307545	-0.00527765	0.0104539
0.0215845	0.0472678	0.0574198
0.00372085	0.00766288	0.00553808
0.00820664	-0.00758676	0.0116821
0.125519	0.129153	0.156243
0.047407	0.0474321	0.0671663
0.166023	0.142307	0.153099
0.127793	0.112067	0.136102
0.000998689	-0.01291	0.001149
0.0525638	0.0422249	0.0694411
0.0748883	0.102351	0.117095
0.103862	0.10688	0.12835
0.105257	0.065359	0.0807
0.0768522	0.073332	0.0978371
0.129355	0.0919279	0.127173
0.0711829	0.0641749	0.0973975
0.168637	0.127723	0.149162
0.0915524	0.0574143	0.0718587
0.0784686	0.0496205	0.060948
0.016325	-0.0034469	0.0180512
0.0392144	0.0511255	0.0851242
0.0395924	0.0477448	0.0603896
0.0562955	0.019419	0.0258087
0.0875666	0.0454009	0.028062
0.0827584	0.0716658	0.0706337
0.18553	0.16967	0.161306
0.079493	0.10719	0.100657
0.0151738	-0.000320229	0.014415
0.00156337	0.00620926	0.0122097
0.353449	0.370861	0.327077
0.0137426	0.0118089	0.0299138
0.186345	0.199525	0.244585
0.122723	0.125663	0.168971
0.153425	0.177255	0.143121
0.00777109	0.00668815	0.0148901
0.0188693	0.0067638	0.00907015
0.0169844	-0.00126055	0.0168603
0.00696394	-0.00073919	0.00369114
0.124129	0.0900851	0.121645
0.105757	0.14641	0.14786
0.0393344	0.0179741	0.0409685
0.00485043	0.0266439	0.0171962
0.0109667	0.00729117	0.0115224
0.301546	0.293391	0.267459
0.0626717	0.0443445	0.0588841
0.0627382	0.0251599	0.0541108
-0.000785704	0.00357214	0.0396686
0.0135058	0.00739432	0.00913114
0.095058	0.107029	0.123206
0.00585312	0.00546883	0.00369096
0.0104485	-0.00687669	0.00412354
0.0602972	0.0376961	0.0670655
0.011838	0.00156083	0.018854
0.0818577	0.07547	0.0794045
0.133055	0.118476	0.0990679
0.243658	0.322668	0.250428
0.0674319	0.0462799	0.0998475
0.101379	0.119254	0.109843
0.212076	0.182379	0.201407
0.0763548	0.131539	0.185201
0.127674	0.101777	0.109002
0.0610301	0.0801864	0.101007
0.205596	0.239636	0.22253
0.163229	0.15448	0.130636
0.411244	0.431553	0.36736
0.115143	0.142779	0.151183
0.0222833	0.0246293	0.0254939
0.0757323	0.0859465	0.128852
0.307946	0.287179	0.276734
0.139575	0.141577	0.136462
0.249743	0.257934	0.219094
0.238015	0.232998	0.251988
0.249324	0.243429	0.265202
0.111783	0.104434	0.108442
0.127725	0.11506	0.136381
-0.000231719	0.003711	0.0102985
0.147192	0.127866	0.135981
0.0186831	0.0240151	0.0660772
0.061274	0.118228	0.118874
0.169151	0.177324	0.201429
0.0203944	0.0162912	0.0278298
0.0179548	0.0109438	0.0100895
0.0454597	0.0758696	0.0881642
-0.0045459	-0.00415999	0.0133103
-0.00294133	0.0100465	0.00618285
0.204882	0.240602	0.275241
0.0808278	0.0897567	0.122367
0.357292	0.389195	0.332129
0.224495	0.229903	0.259688
-0.00029045	-0.000393487	0.00310909
0.0869751	0.0821772	0.111109
0.122627	0.196749	0.20203
0.14069	0.13155	0.155138
0.160132	0.131246	0.146327
0.118393	0.128303	0.160342
0.200209	0.20362	0.22204
0.132225	0.138821	0.169925
0.265352	0.279795	0.276896
0.121858	0.0914893	0.110739
0.112943	0.100291	0.0977591
0.0197756	0.00967502	0.0132037
0.0672965	0.117781	0.127396
0.0848664	0.092027	0.0884846
0.0892211	0.0244379	0.0297236
0.140396	0.0990597	0.0481141
0.126308	0.11654	0.111747
0.371749	0.39518	0.346969
-0.0058626	0.00326709	0.00362905
0.00660903	-0.0109292	0.013167
0.0978028	0.118605	0.102142
-0.00255823	0.00957504	0.0170671
0.0703253	0.0774245	0.0904552
0.0491995	0.0659746	0.0686461
0.0584542	0.0921639	0.0593356
-0.00135267	-0.00644932	0.00166968
-0.00521331	0.00265146	0.00610119
0.00440742	-0.0042534	0.00860137
0.00981586	-0.000134362	0.007708
0.0576079	0.049292	0.0618577
0.0442682	0.0732028	0.0633208
0.0215836	0.0238051	0.0199647
0.00913499	0.0165822	0.0144319
0.0161478	0.00783023	0.00621064
0.089599	0.100864	0.0871544
0.0311492	0.030776	0.0314578
0.0308777	0.0121718	0.0299338
0.00427537	0.0183176	0.0231807
0.00757762	0.000936227	0.0075859
0.0452841	0.0470283	0.0584978
0.0103159	0.00118015	0.00361859
0.00155554	0.00696364	0.0125051
0.0274518	0.0121598	0.0275429
0.0127675	0.00190878	0.0169198
0.0362533	0.0697562	0.0481253
0.0429697	0.0541553	0.0462809
0.0662623	0.0988539	0.0726011
0.0366971	0.0274057	0.0478
0.0935491	0.0982768	0.0840741
0.082322	0.0736908	0.075848
0.0339517	0.0512542	0.0626961
0.0501702	0.0818005	0.0640256
0.0284709	0.0339908	0.0387321
0.0922899	0.104283	0.0833001
0.0744927	0.116908	0.0637772
0.0921197	0.107831	0.103414
0.0375527	0.0576101	0.0612878
0.0126689	0.0173838	0.0136957
0.0266323	0.0487307	0.0541325
0.0914879	0.097052	0.0884688
0.0645415	0.0701107	0.0634369
0.0658313	0.097073	0.0624839
0.0680128	0.0903716	0.089433
0.0929629	0.109763	0.0935873
0.0438987	0.0602245	0.0562341
0.0903087	0.107161	0.0804502
-0.00782237	-0.0068701	0.0097547
0.0733345	0.0872686	0.0756559
0.014748	0.0153237	0.0335984
0.0238589	0.0738207	0.0508041
0.0693715	0.0831734	0.0749815
0.0133903	0.00794293	0.015944
0.00963518	0.0113069	0.00937157
0.0173858	0.0357448	0.0412874
-0.00223604	0.00244788	0.00819209
0.00536455	0.00521819	0.00045486
0.0743272	0.0962952	0.0908848
0.0367738	0.0647134	0.0570554
0.0884783	0.116945	0.106416
0.0787154	0.112703	0.0998833
0.00482994	0.0035133	0.00715148
0.0525338	0.0480424	0.0495224
0.0541355	0.0753431	0.0701114
0.0536022	0.0597535	0.0710833
0.0597122	0.0613117	0.0728457
0.0584884	0.0727245	0.0750906
0.0898106	0.113538	0.0947637
0.0546901	0.0703955	0.0786486
0.0965013	0.109371	0.101752
0.0429842	0.0477389	0.0602812
0.0387147	0.0467687	0.0491911
0.00436877	0.0103507	0.00542085
0.0115777	0.047872	0.0616373
0.0390443	0.0627489	0.0473923
0.037036	0.0105851	0.0144289
0.0585942	0.0422104	0.0259312
0.0524504	0.0603287	0.0559359
0.0940103	0.122117	0.10081
0.00384712	0.00499222	-0.0020328
0.00754265	0.0126398	0.00553998
0.00340067	0.00790187	0.00244014
0.00456668	0.0048994	0.0136187
0.00675797	-0.00375709	0.00994798
0.00546189	0.0138084	0.0114323
-0.00562823	-0.00231968	0.00272212
0.00191694	-0.00160511	0.00631642
0.0048012	-0.00195502	0.00427761
-0.00527408	0.00682017	0.0028956
0.00842887	0.0176027	0.0123345
-0.00584302	-0.00349445	0.0129493
-0.0105448	-0.00957163	0.00925891
0.00268926	0.00322135	0.00132192
1.03145e-05	-0.00150512	0.00683651
0.0151495	0.00477611	0.012357
0.00662513	-0.0020501	0.00992358
0.00486445	0.00448491	0.00257816
-0.00522223	0.00844241	0.00590057
0.00246557	-0.00229834	0.00800788
-0.00148653	-0.00796876	0.0105973
0.000311255	-0.0106381	0.0100866
0.00734804	0.00649746	0.00513521
0.0172679	0.00252068	0.00611727
-0.00203651	0.00141611	0.00447508
0.000239531	0.00765901	0.00213503
0.00616163	0.00309302	0.00592232
0.00543733	0.00853509	0.00746864
0.00454528	-3.03097e-05	0.00392056
-0.000178085	0.00680035	0.00549018
0.0115339	-0.00649535	0.00829609
0.0116877	0.00222877	0.0122143
-0.0049193	0.00138411	0.00557604
0.000602969	-0.0112117	0.00372888
-0.00352425	0.00881677	0.0114987
0.00759164	0.00223257	0.00371463
0.00906616	-0.00195797	0.0118709
0.00655182	0.00317691	0.0123274
0.00132951	0.00967646	0.00609758
0.00269061	0.0121925	0.00591458
0.0169744	0.00330147	0.00798054
0.0103713	0.0042407	0.00301479
0.0130785	0.00164648	0.00890726
0.00681112	0.00530656	0.0137497
0.0152064	0.00658521	0.00608571
0.00911033	-0.00499932	0.00571611
0.0149282	0.0188343	0.00683513
0.00380511	-0.00276101	0.00439553
0.000283412	0.00437723	0.00357905
-0.00142315	0.00622176	0.0127272
-0.00298015	0.00208078	0.00923331
-0.00242132	0.000323244	0.0117092
0.0065079	0.00384212	0.0011432
-0.00382307	0.00364804	-0.00426061
-0.00130086	-0.0181428	0.00614401
0.00396866	0.0104054	0.00454883
-0.00585652	0.00627991	-0.00331851
0.0110516	0.00476702	0.0115887
-0.00116125	0.00395453	0.00623018
0.00576713	0.0148446	0.00841991
-0.00196065	0.00979391	0.00879423
-0.00864478	0.00439838	-0.000546754
0.000505106	-0.00433452	0.0120401
0.0110546	-0.0138557	0.0151275
0.01477	0.000759917	0.00789775
0.00786486	0.00206102	0.00601953
0.00379006	-0.00958042	0.0096187
-0.00480079	-0.0115383	0.00832894
0.00377536	0.00211475	0.0145698
0.00713845	0.0110264	0.012713
0.00725043	0.00129303	0.00459573
0.00616645	0.00876488	0.00507437
0.00550157	-0.00590254	0.00801628
0.00577123	0.00787765	0.00771783
-0.0107601	-0.00268502	0.00974671
0.0203317	-0.000820342	0.00600159
0.012205	0.0105373	0.00764692
0.00661441	-0.00209287	0.00303737
0.00920207	-0.00132061	0.0106068
0.002518	0.0132731	0.0163901
-0.0105436	0.0169452	0.00413429
0.00624974	0.00612819	0.0131921
-0.00249586	0.00250762	0.0086898
0.00431021	0.00925548	0.00617859
0.0019922	0.0174764	0.00627084
0.00178236	0.000515948	0.00875468
0.0103184	0.000988817	0.00979878
0.00141234	0.00248938	0.00252418
0.0092011	0.00464464	0.00752338
0.00887982	0.0146872	0.0074523
0.00444546	0.0163157	0.0103761
0.00739787	0.0179497	0.0140915
0.000759366	0.0263744	0.0113597
0.00651467	0.0114527	0.0186255
0.00418766	0.00489268	0.00955301
0.0129253	0.00738213	0.0135424
0.00215056	0.00827252	0.00828004
0.0069152	-0.0098417	0.00252075
0.0051507	0.00788022	0.00719761
4.47458e-05	0.0147379	0.00514177
0.0008547	0.0199995	0.0116011
-0.00351611	0.00498593	0.0130888
0.00378805	0.01782	0.0114053
0.00527843	0.0131113	0.00776636
0.00297416	0.000422673	0.00319152
-0.000311632	-0.00168591	0.00486788
-0.00147959	0.00389806	0.00567728
-0.00736842	0.0010225	0.012957
-0.00477218	0.00148357	0.0110993
0.00943541	0.000125826	0.0104185
0.00668555	0.000227912	0.00163031
0.00439708	0.00525947	0.0106734
0.00739221	0.00491967	0.00802653
0.00301489	0.00517389	0.00876156
0.00437161	0.00801652	0.0154433
0.00742381	-0.00425528	0.0100734
0.00585705	-0.00248942	0.00168499
0.00351916	-0.00551465	0.0112421
0.00921476	0.00526963	0.00139052
-0.00543699	-0.00178189	0.00813234
0.016587	0.0104892	0.015964
-0.000761627	0.010439	0.0136927
0.0120924	-0.00138852	0.0118105
0.0130853	0.00423842	0.0109591
0.00984489	-0.00740724	0.0152666
0.0014147	0.00753108	-0.00141186
0.00287808	0.00474608	0.00595552
0.00937885	0.00302715	0.0105207
0.00556904	0.000925043	0.00752868
0.00714138	0.00484496	0.0092336
-0.00446906	0.00427975	0.00792145
0.000123838	0.0220552	0.00570539
0.00157569	0.00217214	0.00746173
0.00313021	0.00474676	-0.00122113
0.00510188	0.00345702	0.00441157
0.00948488	0.0178722	0.012684
0.00587164	0.00838653	0.0104423
0.00960468	0.0045118	0.0154961
0.00794428	0.00160387	0.0146396
-0.0067133	0.0167427	0.00680236
0.00816506	0.0048513	0.0126967
-0.00325003	0.0114441	0.00695143
0.00562313	0.0139487	0.00799068
-0.00128989	-0.00392367	0.0131371
0.00603337	0.00467843	0.00958385
0.00644451	0.00867667	0.00822348
0.00518277	0.00581014	0.00970625
0.00514213	0.00240011	0.0147365
0.00546363	-0.000170491	0.00522627
0.000479224	0.0167352	0.0100169
0.00255666	-0.00263783	-0.00180426
0.00312266	-0.00139435	0.00939913
0.00460977	0.00258655	0.010075
0.00200879	0.012881	0.00295744
0.00854429	0.00178917	0.00658692
0.00323863	-0.0101322	0.0104271
0.00448921	0.0144681	0.0176901
0.00806099	0.014927	0.0265669
0.187297	0.223623	0.243402
0.127284	0.123861	0.166468
0.162866	0.171059	0.142457
0.00480841	0.00249246	0.021333
0.0060506	0.00915989	0.0077668
0.0232541	-0.00232078	0.0183001
0.0092897	0.00143568	0.00482546
0.142649	0.102249	0.115612
0.117225	0.169141	0.158118
0.0314965	0.0234008	0.035596
0.00603943	0.00351608	0.0164482
0.019532	0.0172578	0.0133632
0.315319	0.319641	0.265263
0.0619376	0.0581844	0.058506
0.0724589	0.0473189	0.0494245
0.00456684	0.0149464	0.0393103
0.0271445	0.0105003	0.0116603
0.102408	0.10157	0.118023
0.0107507	0.00644395	0.00279118
0.00768527	-0.00108918	0.00643817
0.0687521	0.0525812	0.0615847
0.00922428	0.00714171	0.0196982
0.0618873	0.0856577	0.0780943
0.14779	0.104988	0.0987634
0.257499	0.318039	0.246386
0.0802881	0.0740512	0.107168
0.110582	0.10678	0.0991756
0.218745	0.207172	0.198148
0.0838339	0.140899	0.183075
0.119178	0.118184	0.0988175
0.0780304	0.10284	0.104075
0.215823	0.238414	0.223087
0.16197	0.156772	0.116586
0.395153	0.370961	0.342671
0.131112	0.148081	0.149865
0.0379103	0.0350844	0.0290161
0.080121	0.113365	0.137581
0.337978	0.29682	0.262412
0.146134	0.136082	0.13613
0.246976	0.262783	0.211227
0.252848	0.266805	0.254108
0.25671	0.271262	0.257313
0.131304	0.10508	0.100825
0.138584	0.131277	0.1318
-0.000790214	0.00635657	0.00705718
0.152972	0.14377	0.130854
0.0225323	0.03284	0.0656676
0.0623597	0.127991	0.12373
0.173166	0.181699	0.198855
0.0138968	0.0185167	0.0257061
0.0175347	0.00915015	0.0108231
0.0422947	0.0891406	0.0901127
0.00922565	-0.000727357	0.0159709
-4.5631e-05	0.00495151	0.00402331
0.2133	0.270012	0.278149
0.0853282	0.104915	0.119791
0.447563	0.500492	0.413837
0.245315	0.264704	0.254142
0.0137301	0.00199317	-0.00189635
0.0892429	0.0973615	0.112268
0.133722	0.224327	0.20361
0.149926	0.143736	0.156544
0.155152	0.140413	0.138838
0.143829	0.142275	0.162641
0.212504	0.218551	0.220018
0.12661	0.145077	0.174106
0.292628	0.308079	0.27101
0.13014	0.0999455	0.111109
0.115465	0.103644	0.106321
0.0182193	0.00980527	0.0167273
0.0767099	0.124367	0.123909
0.0855128	0.0843545	0.0931578
0.0962027	0.021217	0.030987
0.152403	0.0969093	0.0452203
0.13751	0.123289	0.108637
0.380327	0.405883	0.34122
0.00731161	0.0296633	0.034092
-0.00643709	0.01207	0.0240659
0.00213624	0.00193964	0.0112121
-0.0101977	-0.00461894	0.00724073
-0.00511442	1.14545e-05	0.00607507
0.0037048	-0.00519828	0.0126048
0.00716434	0.0124661	0.000995918
0.00180886	0.0109	0.0202874
-0.000981873	0.032788	0.0269753
0.00434454	0.00488404	0.00929805
0.0067966	0.0567516	0.0209765
0.00668703	0.0152181	0.00499563
0.012149	0.0229238	0.0219171
0.011514	0.00750641	0.0142063
-0.00476836	0.00382425	0.0110169
-0.00160459	0.00251946	0.00369982
0.00348527	0.00123371	0.0014905
-0.00455733	0.0404345	0.0267882
-0.000221238	0.00705927	0.0042
0.00557878	0.00670081	0.00787482
0.000709856	-0.00334394	0.0125408
0.0121703	-0.00437163	0.00503413
0.00544746	0.0180736	0.0147495
-0.00824698	-0.00732863	0.0118419
-0.00966022	0.0131266	0.0123727
0.00799839	0.0035928	0.0274664
0.00381267	0.000619101	0.0194327
0.00658452	0.0147938	0.0236507
0.00983211	0.0120813	0.0281216
0.00378987	-0.000230521	0.00577764
0.0109002	0.00518166	0.0260262
0.00970141	0.00513457	0.0145075
0.00216031	0.00716406	0.00413597
0.016794	0.0107532	0.0293163
0.0100304	0.014544	0.0193055
0.00557552	0.00884111	0.0143143
-0.00124035	0.0277772	0.029521
0.0102584	0.0236646	0.0226562
0.00558189	-0.00601221	0.01238
-0.000824546	0.0119656	0.0149394
0.0111517	0.0151968	0.0377675
0.00609012	0.0280081	0.0345477
0.00582876	0.00495357	0.0165099
0.00174719	0.000206499	0.0159806
0.00854668	-0.00586868	0.0089825
0.0124573	0.0156702	0.0170861
0.00347226	0.0108428	0.0177097
0.00784584	0.0154897	0.0231614
0.0174576	0.0226012	0.0247903
-0.0160051	0.0265888	0.00681623
0.0117763	-0.00250439	0.00793626
0.00369593	0.00786003	0.0218856
-0.000184659	0.00511019	0.00834064
0.0128749	-0.00428439	0.00867346
0.0186855	0.0183272	0.0300285
0.00553519	0.0163687	0.0148677
0.00384265	0.00732284	0.034245
0.00181022	0.013185	0.0240964
-0.00807194	0.00315439	0.00277373
0.00750655	0.0093087	0.033929
0.00449292	0.0313733	0.0261686
0.00337191	-0.00443352	0.0189049
0.00156419	-0.00750193	0.0121456
0.001371	0.019664	0.0265185
0.00627908	0.00789334	0.027235
0.00117485	0.0221841	0.0247795
0.00324574	0.0191774	0.0315208
0.00202633	0.00410429	0.0124381
-0.00167512	0.0100056	0.0166069
-0.000333268	-0.00513211	0.00804765
0.000335939	0.017865	0.0256284
0.0116404	0.00296331	0.0164326
-0.00457328	0.00572206	0.0153065
-0.00493978	0.00305688	0.00179756
-0.00737787	0.00287192	0.0152238
0.00826681	0.0158117	0.032308
0.0941288	0.101963	0.156596
0.1027	0.117443	0.129519
0.00901358	0.0012627	0.0179055
0.00738352	-0.00288153	0.00767686
0.0119883	0.0127073	0.0200349
0.0158933	0.00242913	0.00617207
0.109889	0.0753109	0.108279
0.0789255	0.110225	0.154743
0.0330219	0.022702	0.034313
0.0128901	0.00276654	0.0107756
0.00604934	0.031706	0.0180727
0.189857	0.204359	0.231544
0.0279242	0.0308245	0.0563216
0.0415304	0.0311951	0.0533334
0.0104589	0.010633	0.0307978
0.0133722	0.00776985	0.00609496
0.0726285	0.0942713	0.109701
0.00263544	0.00577576	0.00497422
0.0115036	-0.00119888	0.00693912
0.0313752	0.0313178	0.0552975
0.0194988	-0.00248485	0.0100347
0.0478147	0.0562825	0.0767254
0.0985652	0.0681906	0.0924462
0.124618	0.155512	0.185248
0.0573538	0.0519316	0.100207
0.0700806	0.0720737	0.0969939
0.14892	0.133515	0.180014
0.0571355	0.115215	0.164494
0.0810305	0.070457	0.0974209
0.0567711	0.0910885	0.0906943
0.129639	0.127458	0.174543
0.114775	0.0845976	0.114863
0.181769	0.193069	0.260992
0.0842123	0.103646	0.12634
0.0302342	0.0320935	0.029075
0.0616288	0.0808588	0.120311
0.160677	0.156209	0.196897
0.102378	0.0944497	0.117557
0.138638	0.151854	0.159806
0.152892	0.162721	0.211316
0.19763	0.213221	0.251148
0.0795726	0.0600317	0.0923955
0.0880104	0.0879492	0.126822
-0.000379047	0.0139981	0.0145868
0.0908529	0.096406	0.118534
0.00931865	0.0256898	0.0605877
0.0563651	0.110241	0.10864
0.10474	0.122163	0.173566
0.0161813	0.0107357	0.025139
0.00687729	0.00622523	0.0206756
0.0369192	0.0568931	0.0847838
0.011374	0.00407267	0.0099935
0.0012294	0.00841786	0.0135986
0.137529	0.189791	0.240017
0.0626406	0.103976	0.10993
0.193276	0.213471	0.250043
0.152519	0.171041	0.228666
-0.00154725	-0.00641382	0.00466151
0.0721624	0.0892117	0.110006
0.0677152	0.169632	0.186542
0.10933	0.0860391	0.134736
0.113864	0.0869763	0.130908
0.0948281	0.106437	0.144497
0.145765	0.139009	0.20262
0.0948205	0.118524	0.16557
0.171376	0.181978	0.244979
0.0774868	0.0753734	0.0940808
0.0734866	0.0770644	0.0921584
0.0203715	0.0180848	0.0109488
0.0726604	0.0990393	0.122748
0.0722179	0.0694806	0.0836978
0.0722868	0.0158516	0.0314782
0.0932547	0.0614494	0.0481763
0.097683	0.0818422	0.0997594
0.188743	0.225617	0.258376
0.093943	0.0914582	0.101264
-0.00421485	0.000573589	0.0181696
0.0111133	0.00540549	0.00329723
0.00547165	0.00083034	0.0098699
0.00730169	0.000892979	0.00888419
0.0678915	0.0503345	0.0866603
0.0532154	0.0886731	0.120324
0.022901	0.0100062	0.0327547
0.0148936	0.0114535	0.0126882
-0.00103067	0.0183608	0.0159669
0.123255	0.128811	0.150664
0.0226337	0.024932	0.0461511
0.0403156	0.0132738	0.0472187
-0.0110425	0.00627684	0.0285906
0.0132172	0.00341216	0.010575
0.0557279	0.0770484	0.110047
0.00670812	0.0114989	0.00974379
0.0132266	0.00478075	0.00436655
0.0251369	0.0220664	0.0425951
0.00539058	0.00817194	0.017831
0.0483606	0.0524754	0.0602094
0.0726707	0.0549719	0.0683411
0.0988077	0.093241	0.122242
0.0372088	0.0302085	0.0765786
0.050275	0.0644181	0.076356
0.104825	0.0850502	0.120988
0.186166	0.310059	0.349283
0.0618641	0.0743929	0.0726667
0.0308792	0.0533179	0.0789932
0.0823733	0.0901193	0.119546
0.0870699	0.0789847	0.0791693
0.130504	0.119209	0.176459
0.0666073	0.0728187	0.102948
0.0151579	0.0241185	0.0218247
0.112788	0.197333	0.249946
0.125654	0.0954898	0.14205
0.0665931	0.0545758	0.0754375
0.0946338	0.10973	0.111039
0.102743	0.104929	0.153065
0.114528	0.124725	0.160961
0.0532697	0.0701164	0.0752817
0.0813541	0.0697367	0.08879
-0.000479825	-0.0058327	0.0121325
0.0737799	0.0677338	0.0907126
0.0202123	0.0215507	0.051075
0.0432842	0.0769907	0.0933731
0.112294	0.132142	0.189411
0.0173332	0.0366527	0.038772
0.0201155	0.00958489	0.0127897
0.0256797	0.0554356	0.0849452
0.00445924	0.00861531	0.0099495
0.0146448	0.0100172	0.0132515
0.0912085	0.112288	0.167027
0.0454257	0.0730213	0.0886058
0.129493	0.132043	0.17296
0.116287	0.143635	0.18642
0.00414342	-0.00649698	0.00769526
0.0480706	0.0600276	0.0778201
0.0541761	0.108395	0.135145
0.0753578	0.0662615	0.0963906
0.0793862	0.0505067	0.0941321
0.0558896	0.0709856	0.116793
0.0823006	0.0884159	0.147833
0.0619396	0.0788905	0.123126
0.110533	0.122849	0.167597
0.0745021	0.0464556	0.0766057
0.0549387	0.040341	0.0723635
0.00144754	0.0072154	0.0150797
0.0474309	0.0630934	0.101142
0.0515313	0.0604282	0.070239
0.0414836	0.0282938	0.0217517
0.0749982	0.0441573	0.0375823
0.0801511	0.0631587	0.0724389
0.132251	0.141736	0.185038
0.00302675	-0.0140828	0.0203004
-0.00617556	0.00755916	0.00854233
0.0086396	0.00694936	0.00825625
0.00634732	-0.0018234	0.00383783
0.0804925	0.0591002	0.0721185
0.0746263	0.112124	0.0935296
0.0284203	0.00763931	0.0226862
0.00938993	0.0159209	0.00131275
-0.00125189	0.0133177	-0.000387695
0.155348	0.165415	0.13689
0.0405773	0.0317728	0.035035
0.0375187	0.0211486	0.0243179
0.00291297	-0.00255417	0.0217714
0.00884612	0.00276875	0.0032535
0.0660688	0.0832339	0.0757779
-0.00158329	0.00496392	-0.00129728
0.0155301	0.00806682	-0.00168418
0.0311638	0.0292482	0.0280314
0.0151946	-0.00633268	0.00146196
0.0387141	0.0793771	0.0537563
0.0900477	0.084702	0.0635194
0.10573	0.13666	0.106791
0.0399341	0.0364777	0.0569562
0.0655825	0.0836439	0.0655411
0.12032	0.118808	0.103307
0.0622362	0.0824607	0.0932588
0.0826665	0.09235	0.0691187
0.0447533	0.0531765	0.0495163
0.115927	0.140301	0.116642
0.112765	0.136733	0.0809542
0.168772	0.168962	0.146556
0.184997	0.185716	0.155081
0.0124913	0.0219522	0.018165
0.0495871	0.0760701	0.0713417
0.157627	0.138403	0.113938
0.0759035	0.108174	0.0741381
0.120821	0.135796	0.096855
0.127815	0.148813	0.121831
0.13668	0.151464	0.137094
0.0668464	0.0815626	0.0610696
0.0907085	0.0956637	0.0838278
0.00694696	0.0052202	0.00881435
0.079302	0.089933	0.0786641
0.00500254	0.0196695	0.0354673
0.0403235	0.0823932	0.0718146
0.104514	0.108353	0.108635
0.00357351	0.0163369	0.0156614
0.0111226	0.0043141	0.00989231
0.0315281	0.0434339	0.0509799
0.00591763	-0.00620485	0.00759609
0.00257788	0.0113808	0.00495108
0.111302	0.151448	0.136979
0.047508	0.08018	0.0748091
0.16288	0.169678	0.145341
0.131297	0.15009	0.141969
-0.00537601	-0.00260891	0.00417812
0.0464511	0.04866	0.0533372
0.0754078	0.128792	0.113073
0.0921359	0.0914751	0.088075
0.0850711	0.0956032	0.0799276
0.0710164	0.0878288	0.09207
0.11523	0.134395	0.126517
0.0766274	0.0997113	0.103093
0.151345	0.153671	0.138241
0.0761571	0.06756	0.066885
0.0699206	0.0618041	0.0508137
0.0074029	0.0107987	0.0044841
0.0508439	0.0743966	0.0686022
0.0516833	0.0693089	0.060553
0.059129	0.0207719	0.0201455
0.0803713	0.0665548	0.0277051
0.0751461	0.080407	0.0670391
0.175112	0.185408	0.15308
-0.003198	0.00923547	0.00630137
0.00648543	0.00045021	-0.00223724
0.00408642	-0.00213897	0.00106808
0.0158685	0.00480808	0.0147933
-0.000331732	0.0031584	0.00865366
0.00865706	0.0150268	0.0125912
0.000113774	0.00345007	0.00901856
0.00824901	0.0105252	0.00424368
0.00158039	0.00227265	0.00927077
0.0168302	0.0156739	0.0110925
0.00452888	0.0148667	0.00931965
0.000849451	0.00461381	0.00928649
0.010188	-0.00045026	0.0113836
0.00825621	0.000299312	0.00540813
0.00651531	0.0107889	0.00469466
0.000961	0.00656621	0.00645548
0.000804972	0.00534145	0.0161673
0.00949601	0.00399114	0.00697711
-0.00577298	-0.000964695	0.000440708
0.00228402	0.00636094	0.0109116
0.0153355	-0.00157292	0.0108452
-0.00573546	0.00423813	0.0134957
0.00594385	-0.00916155	0.0074818
0.00605318	0.00361494	0.0114908
0.0024003	-0.000346099	0.0238012
-0.00071965	0.00672458	0.0116228
0.0137898	0.00283554	0.0159798
0.0112246	0.00178275	0.015779
0.0148415	-0.00234963	0.00887904
0.00219143	-0.00737052	0.0196062
0.00671739	0.00306293	0.014552
0.00359953	-0.000443337	0.00324001
-0.00127568	-0.00246942	0.0155831
0.0105107	0.00550947	0.00770469
-0.00617142	0.00380305	0.00550878
0.00395591	0.00467094	0.0136718
0.00103205	0.0111438	0.0192666
0.00707952	0.0114822	0.0208583
0.00350829	-0.00757871	0.0165592
0.00505618	0.000560553	0.0110659
0.00635031	0.000999592	0.000148946
0.0117053	0.00619898	0.00567116
0.00261628	0.00416726	0.0113016
0.0200842	0.0048404	0.0107029
0.0163144	0.00685216	0.0185477
0.00980086	0.00974363	0.00961888
0.00106555	0.00900744	0.0122744
0.00150409	0.00218757	0.00882188
0.000263325	-0.000705278	0.000524869
0.0107021	-0.00109582	-0.00401075
0.0146855	0.00923115	0.0110339
0.021402	-0.00417033	0.00529891
-8.71458e-05	0.00541555	0.0217813
-0.000379975	0.00974006	0.0164791
-0.00198453	0.0134091	0.00115991
0.00120473	0.0225262	0.00917238
0.00926936	0.00974435	0.0185033
0.00115329	-0.00654517	0.0113468
-0.00341003	-0.000455351	0.00225627
0.0168824	0.00117348	0.00835539
6.91856e-05	-0.00431735	0.0197409
0.0223117	0.00783361	0.00957618
0.00464965	0.0117913	0.0201611
0.0067771	0.00314687	0.0056333
0.00771429	0.0137707	0.00955865
-0.00386987	0.0041715	3.7546e-05
-0.00431295	-0.00124688	0.0156158
0.0125438	-0.00166376	0.0107068
0.00222292	0.0035571	0.00312606
0.00533046	0.0011459	0.00320832
-0.000242401	0.00201076	0.00995769
0.0059455	0.00711585	0.0200676
0.00225707	-0.000568288	0.00659958
0.00193856	0.0103546	0.00560272
0.00931138	0.00941797	0.00471797
0.0114208	0.00788284	0.00615134
0.0109427	0.0140105	0.0134448
0.000463888	0.011607	0.0116729
0.000847444	-0.00299905	0.0184183
0.00962924	0.0161614	0.00524998
0.010866	0.00834497	0.00201051
-0.000639736	-0.00254349	0.0119148
-9.4842e-05	0.00685694	0.0179672
-0.00571831	-0.00497153	0.00550201
0.0042768	0.0069604	0.0101602
0.00296271	0.0112035	0.0133499
-0.000519341	0.0100103	0.0152539
-0.0103794	0.0122364	0.0102254
0.00347818	0.0144532	0.0149579
0.00632061	0.00324917	0.00679834
0.00390151	-0.002761	-0.000760983
0.0167819	0.00750882	0.00787943
0.00924579	-0.0105163	0.00461894
0.00347012	0.0125768	0.0084682
0.0116359	-0.00449294	0.00268707
0.00986625	0.00744383	0.0106875
0.0154979	0.000451603	-0.0023677
0.0138031	-0.00235801	0.00958792
0.00245376	0.00434028	0.00960445
0.00441063	0.00372516	0.00210001
0.0137203	0.00612135	0.00757955
0.000295483	-0.00534036	0.0060726
0.0117299	-0.00443806	0.0043955
0.0136615	-0.00301498	0.00770706
0.00686628	0.0040074	0.00749707
0.00679691	0.00676189	0.00645238
0.00829183	0.0114547	0.00352823
0.00786713	0.000328726	0.013922
0.0322251	-0.00710413	0.00733691
0.00197156	-0.00568733	0.00569328
0.00300251	-0.000160513	0.00766177
-0.00400814	-0.00333171	0.00396167
0.0067571	-9.10653e-05	0.0139164
0.00579558	0.00300083	0.00895351
0.00147187	0.00714585	0.00627175
0.0118167	0.00413731	0.00568728
0.0129577	0.0090182	0.00817919
0.00626253	0.00852587	0.00329928
0.000530492	0.0145948	0.0023376
-0.000999322	0.00158171	0.000827184
0.00764078	-0.0110226	0.00150406
0.00867821	0.001273	0.00914346
9.54979e-05	0.00664307	0.00902192
0.0129045	-0.0010164	0.017986
0.0110917	0.0171777	0.00534947
0.0165254	-0.0102142	-0.00093994
-0.00125841	-0.00128577	0.0125677
0.00490473	0.00503215	0.00535795
0.000221629	0.00599243	0.00636667
0.0141672	-0.00794341	0.00848561
0.00146685	0.00105775	0.00242825
0.00508468	-0.00222236	0.00454687
0.0033969	0.000354477	0.00724517
0.00428153	-0.00495662	0.00965002
0.0119596	0.00558559	0.00818045
-0.00290649	-0.00345957	0.0102797
0.0120904	0.00265431	0.00468081
0.00860529	0.00384017	0.00893642
0.00223158	-0.00176383	0.0020868
0.0104449	0.00810977	0.00427785
0.0095531	0.0137432	0.0041348
-0.00371684	0.00105672	0.00275001
0.00696161	0.00396069	0.0109112
0.000514427	-0.00346798	0.0087772
0.0209293	-0.00438924	0.0120352
0.0195205	-0.0125872	0.0107532
0.00976607	0.00927275	0.0086083
-0.00592588	0.00466135	0.0121922
0.006247	-0.00653794	0.00449335
0.012825	-0.00178218	0.0167958
0.006004	0.00525958	0.0133601
-0.000889533	-0.00428605	0.00982388
0.00820104	0.00535017	-0.00143324
-0.00314539	0.00434124	0.00240949
0.0187011	0.00494362	0.00872321
0.00543709	0.00472598	0.00468824
-0.00991512	0.00777912	-0.00662976
0.00773031	0.00551326	0.0131207
-0.00310377	0.0126264	0.0104656
0.00309652	-0.00447517	0.00784537
0.00367422	0.00423088	0.0115642
0.0153002	0.00149882	0.005554
0.0112244	-0.00530918	0.00966452
0.00937376	-0.00190743	0.007743
0.0136904	-0.00362459	0.0207966
0.00666708	0.00327944	0.0108697
0.00239464	-0.00335075	0.00683371
0.00044022	0.00282374	0.00718742
0.00965231	-0.00373722	0.0106695
0.0136906	-0.0136654	0.00324337
0.0150207	0.00285134	0.014691
0.00137729	0.00306161	0.00911303
-0.00127907	0.00302056	0.00510595
0.00912351	0.00533925	0.0122257
0.0162139	0.0018572	0.0131342
0.00958782	0.00349329	0.0101593
0.0194933	-0.00450899	0.0129399
0.00767037	-0.00118635	0.017295
0.0134971	-0.00658095	0.0174423
0.00486226	-0.00427255	0.0138079
0.0145209	-0.00379289	0.00346204
-0.00625682	-0.00713996	0.000939801
0.012617	-0.000165244	0.0155319
-0.010288	-0.0073746	0.0124059
0.00477497	0.00886735	0.015669
0.00904581	0.00102367	0.0165993
0.00337658	0.00456877	0.00234644
0.00299526	0.00102727	0.00508729
0.00143329	0.00914467	0.00876221
0.00114572	-0.013256	0.00410808
0.0139835	0.0136991	0.00572909
0.00939919	0.00579434	0.0187786
0.00286821	-0.0104489	0.0116732
0.00885418	-0.00523994	0.0194595
0.012343	0.00501191	0.0188402
0.00262133	-0.000593707	0.00789628
0.00440426	0.0101342	0.0184756
0.017454	-0.00241973	0.0143713
0.0129778	0.00857914	0.00110023
0.0116509	0.00386693	0.00232976
0.00280307	0.00485714	0.00861838
0.00702067	-0.00542972	0.00926373
0.0108435	0.0101936	0.0171893
0.013884	0.00464452	0.0197274
0.0102581	0.00693338	0.00548307
-0.00116983	0.00210473	0.0103499
0.00876248	-0.000922269	0.00646332
-9.30042e-05	-9.16262e-05	0.0141391
0.0084235	0.00200745	0.00495222
0.00639895	0.015462	0.00920791
0.00449669	0.0129746	0.00465716
0.0164709	0.00614464	0.0105026
0.0142097	0.00756948	0.0198837
0.0169762	0.0103893	0.00683977
0.00765279	0.00523614	0.00439074
0.0113413	0.00302918	0.00552893
0.0115628	-0.0014889	0.00186389
0.011055	0.0107508	0.0045817
0.00975815	0.0028392	0.0027843
0.000176281	-0.00622417	-0.000640025
0.00306139	0.00680281	0.00598948
0.00807225	-0.00585243	0.0074275
-0.0126041	0.00257445	0.00517441
0.00998847	0.00927111	-0.00168478
-0.0030025	0.0061471	0.00458142
-9.43283e-05	0.00545184	-0.00436092
0.000960214	0.0109841	0.00781514
0.00173066	-0.00314549	0.00420703
0.0107025	-0.00498915	0.00823181
0.0123908	0.00638956	0.00453126
-0.000527054	-0.00397002	0.00585317
0.00613507	0.007789	0.00434137
0.00788556	0.0126846	0.00885516
0.015815	0.0127487	0.00698488
0.00120732	0.00730258	0.00409754
-0.00405076	0.000646792	0.00327305
0.00752893	0.0131091	0.0018096
0.0137408	-0.00633678	0.00082966
0.00887353	0.00535767	0.000370013
0.0108874	0.00341454	0.00417741
0.0106498	0.00311022	0.00636208
0.00760862	0.00884669	0.00668267
0.0121217	0.00291953	0.00753109
0.0101846	0.00139481	0.00111658
0.00550344	0.0140373	-0.000182356
0.00949767	0.00716453	0.00143429
0.0153525	0.00671014	0.00950759
0.0163822	0.00862008	0.0101547
0.00651723	0.00465465	0.00792628
0.00975719	1.91397e-05	0.00709115
0.0099103	-0.00366251	0.00479693
0.00119622	-0.00330692	-0.00224224
-0.000208614	0.0102688	0.00400462
0.0232972	0.0132982	0.00979349
0.00779466	0.00043521	-0.00266037
-0.000989429	0.00696168	-0.000235619
0.00714654	0.00114671	0.00286624
0.00201926	0.00957261	0.00534402
0.00154093	0.017025	0.0100508
0.00186066	0.00870945	-0.0010502
0.0123843	6.60928e-05	0.00613122
0.0110761	-0.00506873	0.00214659
0.0181494	0.00953781	0.00396901
0.00921077	0.0100236	0.0105536
0.00547593	0.00221081	0.0117207
0.01349	0.00101837	0.00754028
0.00788463	0.0015822	0.0042378
0.00458562	0.00454435	0.00715184
0.00537781	0.00780381	0.00865752
0.00851664	0.00119071	-0.000354501
0.00639227	0.0103032	0.00322936
0.0136887	0.00711944	0.00767564
0.00755061	0.00796908	0.00785362
0.0139082	0.00111694	0.00481942
0.0058989	0.00870365	0.00966857
0.00662111	0.00716636	0.0041775
0.00395735	0.00182001	0.00712487
0.0108704	-0.00400512	0.0107967
0.0117057	0.0124264	0.00455363
0.0151392	0.00833462	0.00249997
0.00450772	0.0108609	0.0056846
0.00735844	0.00428928	0.00278989
0.0573925	0.0514964	0.0748982
0.0211296	0.0100504	0.0300464
-0.00242784	0.0104513	0.0129772
0.0136592	-0.000636733	0.00691544
0.12785	0.0927968	0.103844
0.0388433	0.0364262	0.038438
0.0408143	0.0212346	0.041003
-0.0121568	0.00333587	0.0305297
0.0021338	0.0015344	0.00197493
0.0635408	0.0517691	0.0644986
0.00140107	-0.00430802	0.00466893
-0.00284616	0.00563013	0.000927883
0.0434036	0.0263843	0.0603376
0.0135977	0.00214649	0.0198006
0.0478671	0.0390675	0.0474283
0.0998013	0.0526091	0.0529939
0.108108	0.083657	0.0845729
0.0426647	0.0304258	0.0595999
0.0769186	0.0524979	0.0609226
0.100682	0.0690985	0.0888055
0.053095	0.0517486	0.087357
0.0806297	0.0721406	0.0627796
0.034569	0.0311991	0.0507515
0.0978728	0.0864752	0.0901289
0.0949502	0.0917037	0.0714413
0.14039	0.0964481	0.11991
0.0690071	0.0529056	0.0768553
0.0147877	0.0139719	0.0190099
0.0402139	0.0471193	0.0749681
0.130357	0.086574	0.0983539
0.0914459	0.0662858	0.0659386
0.100146	0.0856303	0.07457
0.111587	0.078457	0.117943
0.122224	0.0772078	0.120786
0.0904088	0.0594427	0.0846079
0.0862246	0.0613436	0.0690877
0.00336903	-0.000425482	0.00810891
0.0802385	0.0523759	0.0657228
0.0127054	0.0147195	0.0450462
0.0444023	0.0512445	0.0662843
0.102315	0.0654477	0.0934357
0.0139249	0.00480234	0.0159651
0.0191124	0.00103209	0.00914715
0.0310931	0.0223316	0.0430422
0.00223055	0.00306676	0.00550437
-0.00904691	0.0102741	0.000285533
0.105882	0.0836616	0.115049
0.0565741	0.0469581	0.0663646
0.137879	0.0968487	0.122856
0.121496	0.0976445	0.114757
0.00478564	0.000154908	0.00163072
0.0435042	0.036677	0.0669018
0.0602522	0.0634048	0.0877007
0.106456	0.0819467	0.124734
0.0880463	0.0532653	0.0722826
0.0646809	0.0410712	0.0780265
0.107339	0.0889161	0.103666
0.068933	0.051392	0.0864609
0.12581	0.0921451	0.116351
0.068797	0.054841	0.0568892
0.0600268	0.029706	0.0510117
0.000367699	0.00354974	0.00543081
0.0321953	0.0504311	0.0712125
0.0715122	0.0473557	0.0603757
0.0451766	0.0165451	0.0188298
0.0685348	0.0375157	0.0273572
0.075652	0.0600139	0.0607258
0.140707	0.110334	0.116527
0.0187027	0.0247959	0.0247923
0.00264001	0.0440553	0.016132
0.014744	0.0172415	0.0123872
0.118088	0.159658	0.14095
0.0300283	0.0356974	0.0443595
0.0366134	0.0248374	0.0424138
0.00422866	0.010968	0.0257061
0.00269154	-6.97702e-05	0.010675
0.0540735	0.102326	0.0871602
0.0142988	0.0137913	0.00310778
-0.00125695	0.0110722	0.00170393
0.027421	0.0142435	0.0426783
0.0197674	0.00293559	0.0127134
0.0347827	0.0603414	0.0607469
0.0503384	0.0463882	0.0625175
0.0826405	0.110774	0.109591
0.0451546	0.0474905	0.0660078
0.0411519	0.0650056	0.0712849
0.0882799	0.121315	0.130498
0.0471113	0.0945483	0.12535
0.0642184	0.0704339	0.0719036
0.0420764	0.0847166	0.0796972
0.0836469	0.118141	0.120772
0.0696574	0.0823302	0.0831605
0.120913	0.130543	0.159494
0.0596155	0.0735627	0.101895
0.0127499	0.0311371	0.0257951
0.0359291	0.0793262	0.0998892
0.107271	0.13087	0.131169
0.0558445	0.0641314	0.0794791
0.0857448	0.111394	0.104827
0.102527	0.123398	0.145622
0.0896656	0.130645	0.156214
0.0487339	0.0674978	0.0705672
0.0702781	0.0850529	0.0902256
0.00683446	0.0052467	0.00452279
0.0588636	0.0888614	0.0811299
0.00861745	0.0378126	0.0325764
0.0577704	0.121738	0.100602
0.0826454	0.141446	0.139426
0.0159449	0.0388501	0.018146
0.00946129	-0.00102836	0.0169206
0.0242074	0.0507055	0.0674336
0.00180344	0.0107605	0.00431681
0.0062262	0.0121403	0.00794306
0.0881159	0.153016	0.158107
0.0569625	0.0967322	0.093152
0.119354	0.156551	0.15981
0.1131	0.148095	0.165968
-0.0106997	0.00384641	0.00341672
0.0368529	0.0599543	0.0754787
0.0466537	0.142896	0.141865
0.0615456	0.0825671	0.092735
0.0641058	0.0536323	0.089557
0.0445753	0.0749229	0.100772
0.0748212	0.111098	0.142094
0.0522855	0.110113	0.125033
0.103735	0.163081	0.176527
0.04333	0.0479992	0.0729886
0.0479013	0.0522197	0.0716629
0.00795019	0.0108464	0.00452047
0.0340671	0.0757207	0.0969495
0.0551048	0.0644075	0.0659685
0.0363986	0.0159984	0.024911
0.0664918	0.0512976	0.0336703
0.0431331	0.0656205	0.0678452
0.117332	0.170234	0.17203
-0.00194473	0.00776381	0.0180313
0.00253996	0.0041474	0.00639405
0.0388711	0.018896	0.0355849
0.0148364	0.0165095	0.031591
0.0159543	0.0128507	0.0261594
0.00792718	0.00401604	0.0151883
-0.00301716	0.00561123	0.0100993
0.00932733	0.00492959	0.018181
0.0109442	0.00503827	0.00830633
0.0161172	0.00810096	0.00954064
0.0101138	0.00687514	0.0232699
0.00978174	0.0155301	0.00828988
0.0192897	0.0123373	0.0183864
0.016705	0.0075024	0.0169756
0.0153892	0.0131305	0.0207834
0.0147822	0.00747678	0.0254894
0.0305189	-6.20296e-05	0.0161745
0.0380264	0.0195886	0.031691
0.0178498	0.0144211	0.0338651
0.0218776	0.0164283	0.0228491
0.0143646	0.00073034	0.0218947
0.0272028	0.016419	0.0144406
0.0259364	0.0184918	0.0233528
0.0382445	0.0197299	0.0403818
0.024675	0.008364	0.0244165
0.00391159	0.00950462	0.00382236
0.0186979	0.0136545	0.0282366
0.042218	0.0238467	0.0291982
0.0162147	0.0292181	0.0202091
0.0294764	0.0138537	0.0247141
0.0388624	0.0196785	0.0355657
0.0418206	0.0229962	0.0437513
0.0196238	0.00818395	0.0209321
0.0355549	-0.00144849	0.0284956
0.00701181	-0.0106334	0.00868151
0.0304973	0.00975058	0.0185645
0.00791428	0.00631979	0.0224556
0.0260259	0.00343889	0.0259539
0.0178941	0.0109305	0.0312868
0.0170588	-0.00177377	0.00850533
0.0154543	0.000522638	0.0120295
0.0127958	0.0159449	0.0235405
0.0103103	0.00951539	0.012251
0.00940626	-0.0025801	0.0100914
0.0432963	0.024292	0.0410467
0.0131325	0.02051	0.0250371
0.0386726	0.0198478	0.0433982
0.0332985	0.013978	0.0428642
0.00360399	-0.00862525	0.00768743
0.021055	0.00964264	0.0323382
0.0188246	0.0204997	0.0335439
0.0216251	0.0113467	0.0285841
0.0289892	0.0102268	0.0247966
0.0246792	0.0211351	0.0276613
0.0251608	0.0164366	0.0334135
0.0270612	0.0142521	0.0346604
0.0410545	0.0217165	0.0414485
0.0285243	0.00773427	0.0219695
0.0173169	0.0181947	0.0203798
-0.00736818	-0.003334	0.00448254
0.00188533	0.0298093	0.0384433
0.0195105	0.00235161	0.0203268
0.0290038	0.00405225	0.0129589
0.0270101	0.00389674	0.0134688
0.0141954	0.0196139	0.0220768
0.0316445	0.0339697	0.0415032
0.00606963	0.0179974	0.007818
0.00901145	0.00750206	0.0151866
0.012978	-0.000768199	0.00570846
0.00624061	0.00348868	0.0135362
-0.00855042	0.00580803	0.00809347
-0.00590165	-0.0102265	0.00761319
0.00203015	0.052924	0.0165214
0.00138605	-0.0111629	0.0108425
0.00682524	0.017205	0.00960663
0.0013621	0.00340959	0.0151408
0.0107185	0.0196195	0.00912343
-0.00871684	0.0147602	0.0131435
0.0037081	0.0102108	-0.00262263
0.00483887	0.0117689	0.0128161
0.012876	-0.000285613	0.0140302
-0.00131917	-0.00112817	0.000239543
0.00249318	0.00665221	0.0101812
0.00273352	0.0132712	0.0173903
-0.00327994	-0.00523598	0.0111484
0.018634	0.00629265	0.011719
-0.00195934	0.0134012	0.0104947
0.00958539	0.00214023	0.00498951
0.00646839	0.0170772	0.00929876
0.00528696	0.00316079	0.00938528
0.00354923	0.0102714	0.00663487
0.00759917	0.0337797	0.022636
0.00696423	0.00965585	0.0105502
0.00412926	0.00355763	0.00185303
0.00404676	0.00694765	0.00605067
0.0206704	0.0101714	0.0177877
0.0090281	0.0026917	0.016167
0.00477627	-5.54837e-05	0.00726358
-0.00452402	0.0151581	0.00887894
-0.0115719	0.00247745	0.00388506
-0.00114606	0.0113365	0.0123465
0.00183203	-0.00395838	0.0111694
-0.00226488	0.0109998	0.00753754
-0.0066836	0.0167126	0.0191993
-0.00942864	0.0437285	0.0164284
-0.000849133	0.0180875	0.00630595
-0.00476015	0.0148846	0.0177747
-0.00520536	0.00278748	8.64924e-05
-0.0101263	-0.00547531	0.00371323
0.001293	0.0366166	0.018082
-0.00448594	0.00752151	0.0156796
0.014984	0.00690281	0.0177123
6.34723e-05	0.00158208	0.0185406
0.00485186	0.00190703	0.00400456
0.0215515	0.0229033	0.0174796
0.0058416	0.008128	0.0146863
0.0064763	-0.00250856	0.00684261
0.00154922	-0.0107542	0.00142591
-0.00180345	0.0157797	0.00863245
0.00770901	0.0090033	0.0103381
0.0123586	0.00928882	0.0199698
0.0124764	0.00661856	0.0134944
0.00253522	-0.00565986	0.00953176
0.0158915	0.00229313	0.0161481
0.0130867	-0.00519046	0.00965063
0.0113789	0.0072377	0.0175388
-0.00783557	-0.00227982	0.00507846
0.00598016	0.00743727	0.00921203
0.00958889	0.00761231	0.0101643
0.00523257	-0.00438839	0.00514821
0.00818432	0.0149473	0.0178827
0.00442811	0.0129564	0.0106738
0.0149612	0.0032968	0.00752211
0.0152326	0.00819944	0.0100018
0.00768289	-0.00940481	0.00920314
0.00636342	0.0086219	0.00658621
0.0197842	0.0170365	0.0110488
0.00322268	0.00482628	0.0117927
-0.00593599	0.011994	0.0103897
-0.00199787	0.00642517	0.012353
-0.00168095	0.0107411	0.00860502
0.0123906	0.003254	0.0102477
0.0123363	0.00460217	0.00611359
0.00428338	0.0104765	0.0074799
0.00954672	0.008693	0.01482
0.0036969	0.00240655	0.0164731
0.00347943	0.0101237	0.0107103
0.00780651	0.0209564	0.0111469
0.0128009	0.00131877	0.00587048
0.00607226	0.0200807	0.00991734
0.0143412	0.00237596	0.010383
0.00429811	0.00279012	0.00054699
0.0163854	0.00387439	0.0155087
-0.00317918	0.0065022	0.0102508
0.0096504	0.00532162	0.011613
0.0144618	0.0171555	0.0127575
0.00367262	0.00734556	0.0142195
0.0118341	0.00624034	0.000986221
0.00981626	0.0101267	0.00693442
0.00330866	0.0244934	0.020497
0.013828	0.0189213	0.014118
0.00741594	-0.00266673	0.015711
0.00842051	0.00949666	0.00735708
0.00941211	-0.00618429	0.00575146
0.00578196	0.00733845	0.00835548
0.000363169	0.0043181	0.016035
0.00667293	0.0152502	0.0119029
0.0128087	0.0115084	0.0110873
0.0117848	0.00524189	0.00975058
0.00646519	0.0146103	0.00619185
0.00588827	0.0209841	0.00718288
-0.00128475	0.011166	0.00853503
0.000778892	0.00928897	-0.00166675
0.0115841	0.019398	0.0222469
0.0108119	0.0284712	0.00751218
0.0175243	0.0103129	0.0193792
0.00587189	0.0153394	0.0144952
0.000182046	0.00305626	0.00136234
0.0252286	0.0134737	0.0128398
0.0116086	0.0190843	0.00609326
-0.0018589	0.00996074	0.0113619
0.00723146	0.00308464	0.00821702
0.00639469	0.00440834	0.00597163
0.000604535	0.0106034	0.00937911
0.00760858	0.0232803	0.011378
0.00606889	0.00595481	0.0133525
-0.00107763	-0.000197172	0.00528343
0.0131898	0.00737855	0.0171538
0.00106475	-0.000361616	0.00478327
-0.00254678	0.0170506	0.0128302
0.00984675	0.00393906	0.0110127
0.0124899	0.0142056	0.0064712
0.00637581	0.00736934	0.01108
-0.000628962	0.00709294	0.00857238
0.0142624	0.0193719	0.0197841
0.0648432	0.0497033	0.0522448
0.0666653	0.0337271	0.0485173
0.00229673	0.00865774	0.0264941
0.00593041	0.00446209	0.00632247
0.0881285	0.108178	0.108473
0.00705416	0.0155258	0.0018865
0.012403	-0.00275143	-0.00178767
0.0552984	0.046782	0.0543656
0.017497	0.00510347	0.0125565
0.0665439	0.0697481	0.0694363
0.15091	0.10227	0.0865062
0.22841	0.241378	0.195777
0.0703629	0.0692908	0.0909246
0.104741	0.0951002	0.0946065
0.221986	0.189954	0.189238
0.0925623	0.138616	0.16771
0.141225	0.104162	0.0958372
0.0609129	0.0810859	0.0939625
0.200891	0.199317	0.189978
0.184068	0.145433	0.115481
0.337882	0.295826	0.289789
0.125981	0.150706	0.143795
0.0248446	0.0308673	0.0219353
0.0863527	0.109682	0.117231
0.273432	0.224874	0.212841
0.15885	0.138351	0.127615
0.222654	0.206712	0.172701
0.239891	0.234253	0.214975
0.265161	0.23766	0.244028
0.110334	0.107188	0.0928547
0.136366	0.121283	0.122389
-0.00100004	0.0079216	0.00917414
0.153649	0.113421	0.121174
0.0159054	0.0181336	0.0529218
0.0732786	0.113227	0.106124
0.184383	0.163945	0.187034
0.0149398	0.0125801	0.0189497
0.0199953	-0.00153527	0.0111923
0.0437993	0.0604454	0.0801845
0.00832348	0.00820781	0.00721583
0.000958887	0.00943275	0.0123442
0.218001	0.243126	0.255611
0.0764032	0.0899758	0.112449
0.332306	0.308969	0.27411
0.246768	0.235248	0.233837
0.00370012	-0.000446797	0.00518244
0.0699121	0.079889	0.0910224
0.13502	0.193849	0.189403
0.148187	0.128658	0.145312
0.167088	0.128291	0.133962
0.129036	0.121563	0.147613
0.203734	0.189563	0.199279
0.127194	0.135482	0.157013
0.290636	0.260449	0.257126
0.119208	0.0925191	0.0994122
0.10812	0.090712	0.0876296
0.0116409	0.00722846	0.0143554
0.0770278	0.104115	0.112594
0.0955394	0.0733011	0.0748869
0.0939374	0.0240583	0.0281041
0.14651	0.0852865	0.046136
0.148232	0.111587	0.0917629
0.335441	0.326418	0.285631
0.0332003	0.0226525	0.017261
0.0065801	0.00599198	0.0139999
0.00617609	-0.000272383	0.00696414
0.0261537	0.0226693	0.0315622
0.0097519	0.0142222	0.0129189
0.0191576	0.0022505	0.00416168
0.0217831	0.0143995	0.0303241
-0.00418286	0.00503657	0.0125817
0.0122906	0.0132582	0.0260906
0.0220192	0.032428	0.0321735
0.0486931	0.02922	0.0407107
0.0366464	0.0259456	0.0365906
0.0334143	0.0230616	0.0343142
0.048022	0.0415671	0.0490064
0.0186578	0.0280051	0.0491553
0.0293856	0.0426663	0.0441776
0.0233002	0.0264585	0.0328563
0.0433516	0.0478915	0.0443411
0.0438716	0.0311764	0.0422329
0.0649688	0.0460165	0.0587753
0.0373948	0.0383784	0.0343218
0.0121727	0.00572349	0.0157343
0.0263957	0.0199327	0.0447599
0.0673311	0.0399885	0.0430498
0.0402613	0.0353341	0.0302631
0.0479057	0.0370533	0.0386216
0.0473081	0.0434277	0.0620698
0.0531616	0.0354293	0.0572148
0.0306624	0.0237802	0.0244727
0.0404004	0.031751	0.0350978
-0.00923359	0.00737267	0.0101501
0.0358079	0.0327419	0.0379499
0.000210312	0.0067643	0.0322816
0.0149029	0.026039	0.0372672
0.0467618	0.030912	0.0446765
[truncated: 1,918 more rows]

## Sheet: Fig2
Source	Target	Type	Weight
1	24	Undirected	0.0203943
2	24	Undirected	0.0133229
3	24	Undirected	0.0127372
4	12	Undirected	0.0126614
5	13	Undirected	0.0124774
6	53	Undirected	0.0130505
7	12	Undirected	0.014544
8	47	Undirected	0.0207484
8	79	Undirected	0.0130561
9	55	Undirected	0.0129382
10	24	Undirected	0.0419546
10	86	Undirected	0.0125203
11	24	Undirected	0.0355075
12	14	Undirected	0.0147691
12	21	Undirected	0.0132836
12	22	Undirected	0.0126625
12	70	Undirected	0.0237859
12	75	Undirected	0.0136893
12	78	Undirected	0.0152044
13	23	Undirected	0.0162993
13	24	Undirected	0.051726
13	34	Undirected	0.0124834
13	60	Undirected	0.0123459
15	42	Undirected	0.0141672
16	48	Undirected	0.0142335
16	84	Undirected	0.0124871
16	89	Undirected	0.0138204
17	24	Undirected	0.0240151
18	24	Undirected	0.0313832
19	24	Undirected	0.0202608
20	24	Undirected	0.0161849
24	25	Undirected	0.0182635
24	28	Undirected	0.0127561
24	29	Undirected	0.0267618
24	30	Undirected	0.0174731
24	32	Undirected	0.0280203
24	33	Undirected	0.0289036
24	35	Undirected	0.0147645
24	36	Undirected	0.0202759
24	39	Undirected	0.0139105
24	42	Undirected	0.0133057
24	44	Undirected	0.0128608
24	49	Undirected	0.0166413
24	58	Undirected	0.023608
24	63	Undirected	0.0140415
24	64	Undirected	0.0280397
24	65	Undirected	0.0131674
24	66	Undirected	0.0233029
24	67	Undirected	0.029917
24	72	Undirected	0.0484971
24	73	Undirected	0.0134843
24	77	Undirected	0.0137887
24	83	Undirected	0.0220987
24	85	Undirected	0.0142327
26	43	Undirected	0.013572
26	82	Undirected	0.0126131
26	89	Undirected	0.0190602
27	75	Undirected	0.0119908
31	80	Undirected	0.0127267
37	76	Undirected	0.0141696
38	47	Undirected	0.0162326
40	47	Undirected	0.0131009
41	80	Undirected	0.0158409
42	50	Undirected	0.0128871
43	69	Undirected	0.0123752
45	89	Undirected	0.0148319
46	47	Undirected	0.0140453
47	57	Undirected	0.0135377
47	76	Undirected	0.0140181
47	88	Undirected	0.0137613
47	89	Undirected	0.0217496
51	89	Undirected	0.018716
52	76	Undirected	0.013617
53	89	Undirected	0.0153003
54	89	Undirected	0.0167945
55	89	Undirected	0.0168487
56	80	Undirected	0.0130379
59	89	Undirected	0.0136596
61	71	Undirected	0.0123657
62	71	Undirected	0.0144337
68	70	Undirected	0.0152053
70	89	Undirected	0.0213353
71	89	Undirected	0.0156706
74	80	Undirected	0.013293
77	78	Undirected	0.0183414
80	89	Undirected	0.0183362
81	89	Undirected	0.0133486
87	89	Undirected	0.0140019

## Sheet: Fig3
Source	Target	Type	Weight
1	64	Undirected	0.0135242
2	4	Undirected	0.0137234
3	89	Undirected	0.0152977
4	80	Undirected	0.013456
5	12	Undirected	0.0124878
6	71	Undirected	0.0128649
7	12	Undirected	0.0134825
8	47	Undirected	0.0224998
9	55	Undirected	0.0131702
10	18	Undirected	0.017893
11	72	Undirected	0.0185598
11	83	Undirected	0.0141486
12	38	Undirected	0.0182728
12	65	Undirected	0.0120368
12	70	Undirected	0.0281796
12	71	Undirected	0.0162442
12	76	Undirected	0.0138602
12	79	Undirected	0.0133922
12	84	Undirected	0.0129229
13	18	Undirected	0.0163232
13	24	Undirected	0.016114
14	70	Undirected	0.015845
14	73	Undirected	0.0125359
15	42	Undirected	0.0168573
16	48	Undirected	0.0141984
16	70	Undirected	0.0139621
17	64	Undirected	0.014362
18	25	Undirected	0.0126739
18	32	Undirected	0.0176268
18	64	Undirected	0.0185521
18	66	Undirected	0.0133951
18	67	Undirected	0.0158897
18	72	Undirected	0.018803
19	64	Undirected	0.0136655
20	64	Undirected	0.0138276
21	38	Undirected	0.0123368
22	26	Undirected	0.0138331
22	44	Undirected	0.0124777
23	64	Undirected	0.0129511
26	89	Undirected	0.0198878
27	48	Undirected	0.0120351
28	54	Undirected	0.0118911
29	64	Undirected	0.0143872
30	72	Undirected	0.0141764
31	62	Undirected	0.0132892
33	35	Undirected	0.0128274
33	72	Undirected	0.0184982
34	71	Undirected	0.012138
36	61	Undirected	0.0125272
36	64	Undirected	0.0135319
37	52	Undirected	0.0136337
39	64	Undirected	0.0126849
40	46	Undirected	0.0131326
41	80	Undirected	0.0165661
42	50	Undirected	0.0152523
42	89	Undirected	0.0132737
43	46	Undirected	0.0133912
45	70	Undirected	0.0157331
46	71	Undirected	0.0137967
47	87	Undirected	0.0124161
47	89	Undirected	0.0233116
49	72	Undirected	0.0125242
51	89	Undirected	0.0180492
52	76	Undirected	0.0139973
52	81	Undirected	0.0129097
52	88	Undirected	0.0133279
53	89	Undirected	0.0164707
54	89	Undirected	0.0176876
55	70	Undirected	0.0164034
56	70	Undirected	0.012914
57	71	Undirected	0.0135025
58	72	Undirected	0.0149765
59	70	Undirected	0.0132892
60	68	Undirected	0.0122824
61	80	Undirected	0.0134632
62	71	Undirected	0.0146607
63	64	Undirected	0.0125331
64	86	Undirected	0.0122195
68	89	Undirected	0.0165731
69	71	Undirected	0.0127775
70	75	Undirected	0.0131615
70	80	Undirected	0.0181545
70	82	Undirected	0.0124373
70	89	Undirected	0.0238318
71	85	Undirected	0.0125245
74	80	Undirected	0.0190033
77	78	Undirected	0.0180045
78	89	Undirected	0.0150978

## Sheet: Fig4
Source	Target	Type	Weight
1	33	Undirected	0.0139992
2	4	Undirected	0.0118948
3	89	Undirected	0.0141338
4	14	Undirected	0.0119763
5	70	Undirected	0.0125118
5	87	Undirected	0.0105976
6	55	Undirected	0.0115732
7	89	Undirected	0.0120247
8	47	Undirected	0.0176939
8	85	Undirected	0.0112119
9	47	Undirected	0.0110959
10	33	Undirected	0.0191485
11	33	Undirected	0.016866
12	70	Undirected	0.0202526
13	33	Undirected	0.0118225
14	47	Undirected	0.0148637
15	42	Undirected	0.0166446
16	89	Undirected	0.0119512
17	33	Undirected	0.011769
18	33	Undirected	0.0168141
19	33	Undirected	0.0110658
20	33	Undirected	0.0139602
21	34	Undirected	0.0108328
21	75	Undirected	0.011766
22	80	Undirected	0.0121282
23	33	Undirected	0.0111304
24	33	Undirected	0.0161458
25	33	Undirected	0.01209
26	47	Undirected	0.016398
27	46	Undirected	0.0105926
28	70	Undirected	0.0106429
29	33	Undirected	0.0115482
30	33	Undirected	0.0134176
31	62	Undirected	0.0118796
32	33	Undirected	0.0205517
33	35	Undirected	0.0124001
33	36	Undirected	0.0119504
33	49	Undirected	0.0106938
33	58	Undirected	0.0122739
33	63	Undirected	0.0108365
33	64	Undirected	0.0184382
33	66	Undirected	0.0124091
33	67	Undirected	0.0146872
33	72	Undirected	0.0179671
33	83	Undirected	0.0149651
33	86	Undirected	0.0125565
36	70	Undirected	0.0109327
37	76	Undirected	0.011677
38	70	Undirected	0.0140103
39	47	Undirected	0.0112604
40	55	Undirected	0.011307
41	80	Undirected	0.0149918
42	50	Undirected	0.0147129
42	89	Undirected	0.0129124
43	55	Undirected	0.0113448
44	89	Undirected	0.0111148
45	70	Undirected	0.0133603
46	55	Undirected	0.0117505
47	51	Undirected	0.0150872
47	53	Undirected	0.0133727
47	55	Undirected	0.0150355
47	57	Undirected	0.0118198
47	59	Undirected	0.0116913
47	70	Undirected	0.0177671
47	71	Undirected	0.0147764
47	78	Undirected	0.0139686
47	88	Undirected	0.0114
47	89	Undirected	0.0180769
48	70	Undirected	0.0122861
52	76	Undirected	0.0119916
54	60	Undirected	0.0109692
54	89	Undirected	0.0146256
55	69	Undirected	0.0114826
55	73	Undirected	0.0114078
55	76	Undirected	0.0120888
56	75	Undirected	0.0112463
61	70	Undirected	0.0114296
62	71	Undirected	0.0135782
65	71	Undirected	0.0109719
68	81	Undirected	0.0113908
68	89	Undirected	0.015747
70	75	Undirected	0.0121943
70	84	Undirected	0.0118412
74	80	Undirected	0.0147635
77	78	Undirected	0.0149464
79	89	Undirected	0.0124397
80	89	Undirected	0.0157752
82	89	Undirected	0.0112249

## Sheet: Fig5
Jan-Feb 2014		Mar-May 2014		Jun-Dec 2014
Corr	Normalized MI	Corr	Normalized MI	Corr	Normalized MI
0.0247568	0.0227873	0	0.0222343	0.0158202	0.0197246
0.0160938	0.0230384	0.0251574	0	0.0177252	0.0196011
0.0146035	0.0218184	0.0246387	0.022829	0.0163752	0.0195599
0	0.0209135	0.0111701	0.022354	0.0228988	0
0.0222779	0	0.0200771	0.0222751	0.00685675	0.0200469
0.0183971	0.0225337	0	0	0.0120592	0.0199029
0.0238333	0.0228549	0.0232542	0.0227093	0.0147063	0
0	0.0228388	0.0113855	0.0222565	0.00836631	0.0198575
0	0.0349176	0	0.0229958	0.0137996	0.0255303
0	0.0320451	0	0.0239863	0.010249	0.0235554
0.0183019	0	0.031232	0.0229884	0.0200375	0.0197193
0	0.0369376	0.0192482	0.0241949	0.0157229	0.0210341
0.0177355	0	0.0306957	0.0228995	0.0172302	0.0196364
0	0	0.025758	0	0.00927401	0.0200167
0.0166842	0.0224611	0.0169692	0.022386	0.00665281	0.019697
0	0.0263698	0	0.0234719	0.0092323	0.0204196
0	0.0306772	0	0.0251467	0	0.0233869
0	0.0263229	0	0.0230537	0.0111459	0.0201872
0.0168075	0.0251072	0.0174606	0.0229659	0	0.0222102
0.0149125	0	0	0	0.0139518	0
0	0	0.0292827	0.0229073	0.017914	0.0199475
0.011321	0.0258419	0	0.0224052	0.00920178	0.0202848
0	0.0399732	0.0126762	0.02324	0.00950491	0.0234561
0.0145443	0.0277006	0	0.022687	0.0112656	0.0206346
0	0	0.0238523	0.0228586	0.0153316	0
0	0.0222091	0.012676	0.0229468	0.00869159	0.0198123
0	0.0226885	0.0134428	0.0227503	0.00801503	0.0197183
0	0.0297902	0	0.0230769	0.0097339	0.0208831
0	0.0231449	0.0109481	0.0230862	0.00776473	0.0216816
0.0234668	0.023144	0.0232525	0.0228246	0	0.019763
0.014713	0.0307851	0	0.0246218	0.00804551	0.0258058
0	0.0270284	0	0.0251289	0.00887936	0.0276118
0	0.0223608	0	0.0225851	0.0149915	0.0200727
0	0.0241013	0	0.0233116	0.00619867	0.0209418
0.0152577	0.0272538	0	0.0234804	0.0115468	0.0212669
0	0	0	0.0225806	0	0
0	0	0.0114908	0	0.00627652	0
0	0.0230314	0.0193337	0.0230153	0.0178099	0.0200031
0	0	0	0	0.0138313	0.0196147
0.017545	0	0.0228392	0	0.0135803	0.0196689
0	0.0221698	0.0113414	0	0.00680182	0.0199523
0.0175157	0	0.0170902	0	0	0.0197065
0.0160572	0.0224476	0.0149629	0.0217764	0.00876878	0.0197706
0.0236927	0.0226024	0.0275594	0	0	0.0196678
0.0167662	0.0225706	0.0122621	0.022731	0	0
0.020507	0.0226541	0.0176321	0	0.0188801	0
0.0253971	0.0227272	0.0157526	0	0.0133614	0.0198342
0	0.0245661	0	0.02232	0	0.0202213
0	0.0225791	0.0110218	0	0.00961171	0.0200801
0.0159066	0	0.0210466	0	0.0136541	0.0199957
0.0178768	0	0.0160567	0	0.00693844	0
0.0161324	0.0224686	0.0252498	0.0224029	0.00998665	0
0.0261077	0	0.0323964	0	0.0119823	0.0199641
0	0	0.0340761	0	0.0175205	0.0196156
0	0.0231208	0	0.022601	0.0102195	0.0199615
0	0.0224297	0	0.0228006	0.00705242	0.0196019
0	0.0268566	0	0.0224822	0	0.0199023
0.0180555	0.0222843	0.0155127	0.0228359	0.0135652	0.0198672
0	0.0222834	0.0163804	0	0.0138533	0.0196145
0	0	0.0174053	0.0236274	0.0175582	0.0198558
0.0178954	0.0224205	0.0166422	0.0228086	0.0150883	0.0195933
0	0.0228103	0	0.0223046	0	0.0202455
0.0177079	0.0294851	0	0.0266878	0	0.0241305
0	0.0222645	0	0.0219946	0.0146481	0.0192803
0	0.0265804	0	0.0215758	0.00687531	0.020479
0	0.0298617	0	0.0242716	0.00967745	0.0232878
0	0	0.033108	0	0.0166787	0.0197763
0.0159928	0	0.0285374	0	0.00892922	0.0199254
0.0231245	0.0221954	0.0236571	0	0.0176429	0.0197422
0.0182241	0	0.0223325	0.0229614	0.0140937	0.01981
0	0.0339335	0	0.0244308	0	0.0237786
0.0696305	0.0240913	0.0957713	0.0240115	0.0416873	0.0205919
0.0158471	0.0219158	0.0287063	0	0.0144235	0
0.0124153	0.0222813	0.0246378	0.022417	0.00950947	0
0.0193177	0	0.0205394	0.0222268	0	0
0	0.0231147	0.0255009	0.0221808	0.0198081	0.0199388
0.0125083	0	0.0184706	0	0.0142909	0.0195075
0.0113116	0.0222696	0.0333636	0.0220579	0.0170273	0.0193733
0.0169309	0	0.0268294	0	0.0194508	0.0198337
0.0123004	0.0227978	0	0	0.0106737	0.0196397
0	0.0220825	0.0180616	0.0222003	0.0114869	0.0202536
0	0.0274576	0	0.0232298	0	0.023181
0	0.0233734	0.0200196	0	0.0146337	0
0.0115971	0.0228109	0.0154612	0.0219105	0.0139638	0.0197838
0	0.0233459	0	0.0215636	0.00774732	0.021147
0.0149274	0	0.0168469	0.0225149	0.00841272	0.0195169
0	0	0.0222989	0	0.00798654	0.0197358
0.0251918	0	0.0282652	0.0222903	0.0176543	0.0195685
0.0437233	0	0.0924337	0.0243848	0.116804	0.0223449
0.120972	0.0249777	0.171198	0.0270755	0.173481	0.02351
0.0132008	0	0.0603458	0	0.100398	0.0213853
0.0723654	0.0247295	0.0744813	0.0237934	0.0725917	0.0213636
0.0567685	0.0238251	0.0461388	0.0235616	0.0752491	0.0211033
0.111596	0.024802	0.121557	0.0240349	0.133139	0.0226224
0.0518108	0.0235745	0.0670318	0.0231629	0.0653783	0
0	0.0252372	0	0.0206788	0	0.0196807
0	0.0228117	0	0.0211064	0.00735405	0.0190925
0.110656	0.0256429	0.13828	0.0254162	0.136654	0.0224927
0	0.0259668	0	0.0215404	0.0268639	0.0197815
0.0828415	0.0248251	0.0950332	0.0244351	0.122344	0.0221747
0.0522263	0.0237047	0.0689384	0.0234449	0.100651	0.0215167
0.0677928	0	0.0837985	0.0240327	0.0772097	0.0214638
0	0.0232744	0.0121977	0.0219432	0.0160414	0.0199022
0	0.0241766	0	0.0210555	0.00815849	0.0191859
0	0.021312	0	0.0223147	0.0135089	0
0	0.0233076	0	0	0	0.0198361
0.0694573	0.023936	0.0626237	0	0.0727921	0.0209309
0.0502695	0.0232917	0.0744766	0.0244557	0.093162	0.0218486
0.0276937	0.0235763	0.0164852	0.022083	0.0338411	0.0206554
0	0.0262954	0.016174	0.0217301	0.0138903	0.0195431
0.0179041	0.0230129	0.0155948	0.0224336	0.0145322	0.0193625
0.102751	0.0241992	0.116374	0.0235364	0.117179	0.0223732
0.0219533	0	0.0171556	0	0.0360194	0
0.0323931	0.0237268	0.0180657	0	0.0324369	0.0203497
0	0.023252	0.0228397	0.0221344	0.0263069	0.0200495
0	0.0232575	0	0.0212423	0.0103173	0.0195386
0.0643548	0.0238709	0.0578948	0.0232368	0.0690507	0.0207517
0	0.0231047	0	0.0212275	0.00658601	0.0199354
0	0.0211165	0	0.0215955	0.00688931	0.0202116
0.0140677	0.0239508	0.0246083	0	0.0416599	0.020435
0.0122962	0.0232021	0	0.022261	0.0104647	0.0198845
0.0696297	0.0251433	0.0771782	0.0241937	0.0772245	0.0211224
0.0599589	0.0244856	0.0475162	0.0240372	0.0520545	0.0210263
0.0797515	0.0240726	0.0941184	0.0236347	0.0991294	0.0216301
0.0311805	0.0234559	0.0344109	0.0226204	0.0568528	0.0212582
0.049972	0.0242164	0.0668527	0.0231347	0.0727225	0.0209878
0.088541	0.0246227	0.0965311	0.0235776	0.102573	0.0216663
0.0447015	0.0234829	0.0547851	0.0234486	0.0978981	0.0218023
0.0703773	0	0.060257	0.0236988	0.0661443	0.0208169
0.031173	0.022039	0.0515568	0.0223597	0.0690808	0.020487
0.0837083	0.0239498	0.0872028	0.0232048	0.0976431	0.0215327
0.0779223	0.0246219	0.0644999	0.0243665	0.0660943	0.0206293
0.122541	0.0246727	0.114215	0.0245838	0.138697	0.0224137
0.0468676	0.0237004	0.0668148	0.0231866	0.0707665	0.0214132
0	0.0224469	0.0222646	0.0232063	0.0220554	0.0200828
0.0318446	0.0239044	0.0578311	0.0237851	0.0822371	0.0218197
0.100529	0.0243101	0.103297	0.0247439	0.100623	0.0218199
0.0701491	0.0237143	0.0518714	0.0236782	0.0667822	0.0208967
0.0882843	0.0239452	0.101394	0.0242087	0.0949008	0.0215228
0.0804557	0.0251198	0.094398	0.0234678	0.117522	0.0215511
0.102617	0.0250791	0.0984193	0.0238863	0.138235	0.0228533
0.0637467	0	0.0372591	0	0.0661701	0.0205655
0.0725709	0.0237905	0.0721623	0.0250686	0.0822035	0.0216704
0	0.0223061	0	0	0	0.0189121
0.064474	0	0.0802176	0.0231934	0.077267	0.021121
0.0112895	0	0.0265102	0	0.0394189	0.020668
0.0400951	0	0.0825197	0.0235807	0.0874775	0.0213033
0.0850904	0.0243494	0.0835326	0.0239595	0.108233	0.021721
0.0212176	0.0226608	0	0.0222767	0.0239227	0.0198849
0.0285526	0.0239756	0.0124529	0.0226453	0.0134805	0.0197861
0.0304651	0.0227972	0.0420702	0	0.061933	0.0206787
0	0.0228782	0.0183532	0	0.00636274	0
0	0.0228879	0	0.0216585	0.00909703	0.0195612
0.0899527	0.0233858	0.114132	0.0239458	0.130896	0.0224097
0.0358012	0	0.0814877	0.0235501	0.0800685	0.0211596
0.117051	0.0249105	0.130498	0.0248559	0.132513	0.0229302
0.103419	0.024996	0.126379	0.0240327	0.12973	0.0224927
0	0.0258542	0	0.0210748	0.0117764	0.0193195
0.0350277	0.0235505	0.0464985	0.0226621	0.0705479	0.0207613
0.0685751	0.0233145	0.100883	0.0246272	0.107987	0.021905
0.0732792	0.0245156	0.0477874	0	0.083697	0.0210344
0.0644761	0.0239845	0.0509783	0.0237422	0.0717729	0.0208845
0.0455503	0.0241934	0.0747208	0.0235901	0.0900189	0.0217324
0.0769747	0.0239475	0.0951008	0.0240487	0.116101	0.0224563
0.0674525	0.0237871	0.0830766	0.0233892	0.104067	0.0217563
0.114276	0.0247373	0.126609	0.0249474	0.140037	0.0226264
0.0624587	0.0238436	0.0391922	0.0230973	0.0552185	0.0208703
0.0366876	0.0235588	0.0538121	0.0231847	0.0584374	0.020717
0	0.023858	0	0	0.0124641	0.0199051
0.0307444	0.0235302	0.0583236	0.0229286	0.0819174	0.0215353
0.0691016	0.0243506	0.0943512	0.0238632	0.093703	0.0215787
0.0276612	0.0233616	0	0	0.0243381	0.0201312
0.0538247	0	0.0429266	0	0.0318908	0.0205957
0.0548949	0.0238806	0.050423	0.0235844	0.0609328	0.0213119
0.110517	0.0246288	0.132961	0.0256083	0.138224	0.022596
0.0521056	0.0236842	0.0982335	0.0241676	0.140033	0.022536
0.0238725	0	0.0739698	0.0231534	0.153935	0.0236936
0.0414976	0.0236732	0.0836113	0.0236521	0.100878	0.0218367
0.053505	0	0.112041	0.0253902	0.128198	0.022652
0.0848207	0.0238038	0.177875	0.0281082	0.223242	0.0264327
0.03662	0	0.0699519	0.023475	0.0851952	0.0216239
0	0.0239685	0	0.0212469	0.0101741	0.0197613
0	0.0238507	0	0.0207661	0.019301	0.0187576
0.0917071	0.0241995	0.200943	0.0295961	0.227147	0.0266287
0	0.0237677	0.027115	0.0216409	0.0270231	0.020151
0.07141	0.0237159	0.153017	0.0267937	0.20643	0.0261518
0.0489758	0.0245969	0.102638	0.024434	0.144814	0.023313
0.0474351	0	0.120526	0.0252282	0.118653	0.0230399
0	0.0225416	0	0.0220697	0.0239826	0
0	0.0229582	0	0	0.00827501	0
0	0.0218778	0	0	0.0190623	0
0.0118337	0.0224198	0	0	0.00809639	0.0195338
0.0519466	0	0.0611862	0.0234259	0.0942861	0.0215647
0.032634	0	0.113623	0.0246257	0.140243	0.023046
0.0265113	0.0227351	0.0214817	0	0.0372619	0.0202499
0	0.025154	0.0114382	0.0219156	0.0176236	0.0195692
0	0.0222716	0.0110635	0	0.0229443	0.0197948
0.087842	0.0240674	0.189983	0.027775	0.208213	0.0263943
0.0257108	0	0.0485512	0.0227159	0.0536663	0.0207595
0.0233141	0.0232846	0.0221996	0	0.0490964	0.0202662
0	0.0221456	0	0	0.037864	0.020358
0	0.0219261	0.0108366	0	0.0103207	0.0195449
0.0318648	0.0232997	0.089224	0.0240872	0.0998167	0.0219379
0	0.0222513	0	0	0	0.0188887
0.0113817	0.0196377	0.0119608	0.0211218	0	0.0197503
0.0275375	0	0.0430771	0.023935	0.0642451	0.0210003
0.0142774	0.0229919	0.0126268	0	0.0173216	0
0.0328724	0.0239612	0.0556045	0.0223657	0.0628868	0.0206377
0.0461455	0	0.0688181	0	0.0776347	0.0213446
0.061426	0.0234132	0.127144	0.0252145	0.170552	0.0240647
0.0333096	0.0232688	0.0655815	0.0233574	0.0932009	0.0217846
0.0509491	0.0238112	0.0577015	0.0239237	0.0867059	0.0216376
0.086431	0.0237514	0.128681	0.0255431	0.17335	0.0249434
0.0512273	0.0235517	0.113554	0.0247435	0.1571	0.0236888
0.0406141	0.0234245	0.0819563	0.0237015	0.0853871	0.0216094
0.0245911	0.0222318	0.0701104	0.0223753	0.100708	0.0215942
0.063496	0	0.120197	0.0252351	0.16518	0.0240119
0.0540203	0.0237992	0.0811808	0.0238453	0.0972165	0.0217527
0.0941314	0.0244745	0.174777	0.0272227	0.247471	0.0277421
0.0435361	0	0.128675	0.0259246	0.128807	0.0226708
0	0.0222908	0.0295118	0.022473	0.0300329	0
0.031976	0	0.0859759	0.0238082	0.121617	0.0227401
0.0980602	0.0244906	0.153522	0.0261456	0.176167	0.0236941
0.0491869	0.0241715	0.0853167	0.0243473	0.109328	0.0220114
0.0772368	0.0240096	0.141926	0.0246737	0.154328	0.0233574
0.0786063	0.0239576	0.16722	0.028293	0.199538	0.0254246
0.0893355	0.0247312	0.187751	0.0278457	0.223105	0.0263761
0.0423251	0.0234731	0.0647069	0.0238713	0.0931281	0.0215689
0.0641908	0	0.0777231	0.0234482	0.105943	0.0221488
0	0.0214156	0	0	0.0114602	0.0194833
0.0427803	0	0.0859473	0.0248927	0.108485	0.0221989
0	0	0.0270689	0	0.0598692	0.0212336
0.0397775	0.0234955	0.0948697	0.024246	0.100314	0.0219533
0.0589236	0	0.122763	0.0249703	0.166498	0.0240301
0.0219085	0	0.02178	0.0223932	0.0264935	0
0	0.0233232	0	0	0.0198185	0.0194593
0.0252028	0.0227784	0.0582457	0	0.0826303	0.0210202
0.011442	0.0221853	0	0	0.00783796	0
0	0.0225209	0.0185492	0.0219221	0.010577	0.0195001
0.0878764	0.0245179	0.159712	0.0270561	0.225583	0.0264751
0.0410268	0.0237839	0.0836082	0.023471	0.105716	0.0220495
0.090835	0.0240674	0.196097	0.0285806	0.228998	0.027344
0.0879535	0.0235309	0.16615	0.0272798	0.207855	0.0256305
0	0.0241285	0	0.0210691	0.00964348	0.0188026
0.0446885	0.0234913	0.0798908	0.0241734	0.099914	0.021914
0.0585978	0.0232818	0.164011	0.0273916	0.177974	0.0245683
0.0662329	0.023517	0.0904406	0.0246668	0.126612	0.0230561
0.0518601	0.0235748	0.0878923	0.024094	0.115048	0.0223893
0.0516241	0.0223469	0.109985	0.0247809	0.142162	0.023187
0.0686474	0.0243866	0.13293	0.0256892	0.18225	0.0248929
0.0586211	0.0236034	0.128847	0.0259717	0.155827	0.0237199
0.0880418	0	0.183186	0.0275491	0.22309	0.0265963
0.0520365	0.0234292	0.0793907	0.0236536	0.0877756	0.021678
0.0320682	0	0.0805635	0.0236945	0.0927032	0.0216916
0	0.0223	0.0157302	0	0.0105231	0.019679
0.0445274	0.0237333	0.108975	0.0243958	0.117473	0.0225136
0.0297289	0.023441	0.0629718	0.0232961	0.078487	0.0213499
0.0277831	0.0228779	0.016991	0	0.0303241	0.0196963
0.0513622	0.0239431	0.0562502	0.023738	0.0476522	0
0.0561335	0	0.082888	0.0237768	0.0951067	0.0217265
0.0944191	0	0.213804	0.0301346	0.24904	0.0278734
0.017	0	0.0574835	0.0232218	0.111897	0.0219236
0.0685512	0.0231401	0.0842449	0.0244816	0.0904371	0.0213657
0.0705091	0.0235809	0.0604468	0.0233817	0.0956802	0.0215609
0.108623	0.0240644	0.121138	0.0250745	0.156296	0.0235274
0.0546701	0	0.0874411	0.0245423	0.0722421	0.0210906
0	0.0234633	0.0146762	0.0204493	0	0.0196677
0	0.0211321	0	0.020497	0.0140504	0.0191322
0.123721	0.0250064	0.152044	0.0264269	0.157285	0.0236205
0.0213323	0.0234974	0	0.0218239	0.0221581	0.0196846
0.0864247	0.024386	0.106223	0.0255406	0.142051	0.023669
0.0743277	0.0234046	0.0866662	0.0251316	0.111385	0.0223481
0.0748104	0.0242426	0.0986008	0.0243686	0.0930383	0.0217591
0.0180041	0.0220824	0	0	0.0148761	0
0	0.0222786	0	0.0220361	0.0078991	0.0190129
0	0.0207237	0	0	0.0111303	0
0	0.021953	0	0	0	0.0196054
0.0690306	0.023921	0.0596107	0	0.0818075	0.0216154
0.0532925	0.023213	0.0944141	0.0251042	0.107726	0.0220586
0.0286181	0.0226494	0.0262454	0.0221857	0.0323861	0
0	0.0244682	0	0.0231676	0.0150301	0.0194289
0	0	0.0152291	0	0.017411	0
0.112631	0.0244462	0.13444	0.0252002	0.139746	0.0229306
0.0483507	0.0227337	0.0256416	0	0.0448417	0.0205424
0.0263098	0	0.0271498	0	0.041985	0.0203794
0	0.0221324	0	0	0.0228147	0
0.016187	0	0	0	0.012716	0.0194243
0.065675	0.0236422	0.0871453	0.0245125	0.0842858	0.0210904
0.0178384	0.0225989	0	0.0210497	0.00839582	0.0195131
0	0.0203919	0	0.0215236	0.00818504	0.0197269
0.0351188	0	0.0168272	0.0233367	0.0367123	0.0204827
0.0210623	0.0225812	0.0108564	0	0.014361	0.0198988
0.0574113	0.0233581	0.0780911	0.023817	0.0816195	0.0210696
0.0623079	0.0239163	0.0664926	0.0244874	0.0600078	0.0212473
0.094787	0.02456	0.102861	0.024243	0.126042	0.0226253
0.045454	0.0239029	0.0473415	0.0227513	0.0725331	0.0213414
0.0481252	0.0238289	0.0849169	0.023579	0.0739046	0.0218158
0.107927	0.0240791	0.0980074	0.0252025	0.123814	0.022362
0.0556788	0.0229306	0.0801395	0.0238788	0.112445	0.0219556
0.0740974	0.0237752	0.0873311	0.0244623	0.0836576	0.021251
0.0516429	0.0217281	0.0526678	0.0226733	0.0763739	0.0206227
0.109408	0.0244439	0.122388	0.024958	0.125842	0.0224531
0.105283	0.0236803	0.12346	0.0246953	0.0891288	0.0216054
0.124114	0.0246845	0.13234	0.0255383	0.16037	0.0234485
0.063979	0	0.0849626	0.0240444	0.0885143	0.0217614
0.0195558	0	0.029421	0.0224135	0.0225554	0.0204418
0.0473084	0	0.0659722	0.0242059	0.0913556	0.0215233
0.116754	0.024585	0.111873	0.0237404	0.120718	0.0223845
0.0786806	0.0238539	0.0861261	0.0245171	0.0823777	0.0214314
0.0965387	0.0244716	0.123874	0.0242064	0.107718	0.0219192
0.115764	0.0244822	0.120695	0.0249557	0.147133	0.0229571
0.114689	0.0240783	0.142567	0.0259838	0.156637	0.0235072
0.0621776	0.0242773	0.0614815	0.0239172	0.0738273	0.0209816
0.0764836	0.0237405	0.0967925	0.0245788	0.0954622	0.021838
0	0.0211491	0	0.021194	0.00845803	0
0.0872484	0.0237451	0.0758605	0.0243047	0.0898953	0.0218355
0.0168872	0	0.0114432	0	0.044758	0.0212252
0.0463178	0.0225904	0.0801193	0.0238648	0.0951044	0.0217897
0.0998005	0.0244948	0.115807	0.0254629	0.121884	0.0223904
0.0250123	0.0232953	0	0	0.0289556	0.0199332
0.0164316	0.0220839	0	0.0228257	0.0135409	0.0194648
0.0425637	0	0.0456853	0.0226037	0.0649839	0.0212986
0	0.0217396	0.0128781	0.0214561	0.0112616	0.0198877
0.0115692	0.0222835	0	0	0	0
0.0880593	0.0235413	0.128499	0.0257279	0.151654	0.0233069
0.0549981	0.0231008	0.0865525	0.0248369	0.0910375	0.0216739
0.112469	0.0240644	0.137781	0.0258216	0.158502	0.0230135
0.116957	0.0238839	0.1417	0.0257347	0.158965	0.023317
0	0.02296	0	0.0214759	0.00937987	0.0192046
0.0595454	0.0234787	0.0702128	0.0239656	0.0752043	0.0210908
0.0593491	0.0229708	0.112105	0.0251362	0.122499	0.0221416
0.0800388	0.0241061	0.0706703	0.0242384	0.0994952	0.0219109
0.0794431	0.0232292	0.0805174	0.0237792	0.0965187	0.0217915
0.0637237	0.0234456	0.0799296	0.0241429	0.0951607	0.0214346
0.0891936	0.0232569	0.11215	0.0249078	0.134532	0.0224227
0.0778042	0.0232617	0.0926723	0.02432	0.124113	0.0222501
0.115963	0.0243976	0.146006	0.0265549	0.158058	0.0235557
0.0578162	0	0.0572261	0	0.0717388	0.0208831
0.0551419	0.0235338	0.0621086	0.024036	0.0703659	0.0212069
0.016578	0.0219536	0.0133636	0	0.00701226	0.0199694
0.0384573	0.0230345	0.0582896	0	0.0927955	0.0217882
0.0921442	0.0235591	0.0939475	0.0246466	0.0956427	0.0219206
0.0494553	0.0231299	0.012517	0	0.0287471	0
0.0787452	0.0231904	0.0446355	0	0.0365748	0.0206677
0.0613664	0.0235253	0.0740785	0.0239369	0.0765155	0.0208163
0.129891	0.024423	0.144928	0.0255771	0.16459	0.0235254
0.0164953	0	0.043536	0	0.0863605	0.0215846
0.0261382	0	0.042031	0	0.108935	0.0221717
0.0396916	0.0223888	0.108116	0.0226636	0.170836	0.0241948
0	0.0226696	0.044236	0.0230884	0.0745827	0.0210551
0	0.022686	0	0.0207003	0.0146274	0.0192995
0	0.0215555	0	0.0209665	0.0100354	0.0187942
0.0414346	0.021966	0.11264	0.0246676	0.171285	0.0239947
0	0.0246474	0	0.0233436	0.0331205	0.019843
0.0326539	0.0219627	0.0903982	0.0236605	0.152281	0.023538
0.0221079	0	0.0622256	0	0.116565	0.0220769
0.0367309	0.0221246	0.0583839	0.0233645	0.0930139	0.0218685
0	0.0215864	0	0	0.0186865	0
0	0.0220669	0	0.0216711	0.00695668	0.0191221
0	0.0206485	0	0.0217863	0.0116107	0
0	0.0218446	0	0	0	0
0.0207291	0	0.026323	0	0.0885375	0.0218038
0.0314429	0	0.0881932	0.0236926	0.10741	0.022008
0	0.0219364	0.0152227	0.0224611	0.0356164	0.0206658
0	0.0234336	0	0.0220787	0.0153043	0.0194131
0	0.0214183	0.0109825	0	0.0168344	0.0196797
0.0493365	0	0.100302	0.0242432	0.154462	0.0242999
0.0157599	0	0.0198626	0.0222861	0.0492699	0
0.0142104	0	0.011381	0	0.0427433	0.0205193
0	0.0203733	0	0	0.0412551	0.0206592
0	0.0210748	0	0.0209644	0.0153788	0.0197765
0.0137728	0	0.0395545	0.0228733	0.0818075	0.021334
0	0.0212437	0	0.0204835	0	0
0	0.0198511	0	0.0215168	0.00979344	0.0193372
0	0	0.0270479	0	0.0550462	0.0211445
0	0	0	0.0220259	0.00781033	0
0.0130872	0.0226134	0.0310884	0.0222652	0.0584331	0.0207155
0.027965	0	0.0289715	0	0.0716084	0.02105
0.0329049	0	0.0670871	0.0232268	0.12194	0.0225519
0.0169097	0.0227169	0.0350785	0	0.0820965	0.0214675
0.0156256	0	0.0328112	0.022803	0.0833014	0.0213491
0.0359732	0	0.0716037	0	0.130485	0.02297
0.0198157	0.0218943	0.0497841	0	0.121514	0.0224145
0.0196654	0	0.0361937	0	0.0670441	0.0211931
0.0180636	0	0.0517724	0.0221656	0.0848741	0.0208658
0.0308606	0	0.0662266	0.0231878	0.126926	0.0225213
0.034697	0	0.0369556	0	0.0779864	0.0212885
0.04706	0.0222969	0.0950318	0.0238555	0.175477	0.0242494
0.0243842	0	0.0577553	0.0228784	0.0990138	0.0218749
0.012231	0.0214759	0.0238206	0.0218646	0.0253243	0.0202359
0.0134967	0	0.0450332	0	0.104552	0.0217101
0.0465004	0	0.0806995	0.0232429	0.134887	0.0230679
0.0293429	0	0.038737	0.0230915	0.0888655	0.0218807
0.0265888	0	0.0781809	0.0232223	0.114657	0.0218667
0.0378679	0	0.0842916	0	0.161181	0.0237201
0.0403871	0	0.090193	0.0233737	0.171401	0.0241201
0.0206884	0	0.0339255	0.0234135	0.0661333	0.0212032
0.0207765	0	0.051979	0.023119	0.0913785	0.0220626
0	0.0208433	0.0136996	0.0217322	0.0124483	0.0193293
0.0269179	0	0.0628842	0	0.0955869	0.0217326
0	0.0223498	0.0233452	0	0.0613549	0.0209491
0	0	0.0762096	0.0230116	0.090506	0.0217758
0.0321057	0.022698	0.0710971	0.0231718	0.127288	0.0227356
0	0	0.0164601	0	0.023348	0
0.0113962	0.0223896	0	0.02269	0.0112928	0.0195031
0.0209657	0	0.0434129	0.022287	0.083123	0.0210735
0	0.0202634	0	0.0208659	0.01044	0
0	0.02073	0.0157053	0.0215114	0.0141353	0.0195096
0.0322746	0	0.0987342	0.0233714	0.163825	0.0238553
0	0	0.045406	0.0227434	0.0946433	0.02147
0.0365841	0.0225541	0.112743	0.0241767	0.181739	0.0247143
0.0350845	0	0.0861663	0.0229951	0.163297	0.023734
0	0.0232009	0	0.0210934	0.00748285	0.0193653
0.0225751	0	0.05373	0.0225126	0.0873821	0.0220382
0.024727	0.0213194	0.0947589	0.0234379	0.14263	0.0234294
0.0243031	0	0.0466107	0	0.0977134	0.0218443
0.0341028	0	0.0342617	0	0.0911285	0.0215088
0.0154443	0	0.0596355	0.0225424	0.11919	0.0223004
0.0308133	0	0.0807863	0.0233553	0.156696	0.023926
0.0219713	0.0220443	0.0707275	0.0234073	0.123726	0.0223733
0.0464153	0	0.103085	0.0227627	0.173349	0.0242575
0.0263536	0	0.0334006	0	0.0745634	0.0216482
0.0120905	0	0.044243	0	0.0780269	0.0213476
0	0.0220634	0	0	0.0145268	0.0196891
0	0	0.0675875	0.0234476	0.110054	0.0223788
0.0140064	0.0215765	0.0429982	0.0226074	0.0592797	0.021217
0.0221712	0	0	0	0.0279425	0.0197585
0.0218672	0	0.0198255	0	0.0409709	0.0209731
0.0202062	0.0221858	0.0345904	0	0.0829489	0.0213592
0.044281	0.0224042	0.118198	0.0235274	0.184048	0.0245647
0.0612544	0.0246411	0.0584744	0	0.0697904	0.0214467
0.120141	0.0249404	0.102089	0.0243985	0.121846	0.0225804
0.0518647	0.0244329	0.0615992	0.0234256	0.0580069	0.0210375
0	0.0224763	0	0.0207065	0.0142566	0.0196158
0.0134908	0.0219653	0	0.021038	0.00694886	0
0.11632	0.025468	0.127297	0.0251609	0.116731	0.0226006
0	0.0232952	0	0.0221181	0.0165313	0
0.0856859	0.0248345	0.0942381	0.0246131	0.104493	0.022253
0.0671641	0	0.0829028	0.0241566	0.0801213	0.0216672
0.0639159	0.0238836	0.0985207	0.0240927	0.0773428	0.0217498
0	0.0224322	0	0.0221582	0	0.0201244
0	0.0221434	0	0.0214712	0	0.0194599
0.013982	0.021465	0	0	0.00980634	0
0	0	0	0	0	0.0195686
0.0730209	0.0241852	0.0576481	0	0.0692078	0.0217558
0.0613595	0.0234991	0.0875258	0.024241	0.0827498	0.0211961
0.028526	0	0	0.0226625	0.0247722	0.0208231
0	0.0222992	0	0.0215272	0	0.0196762
0	0	0.0129801	0	0.0109262	0
0.125886	0.0250578	0.103629	0.0246428	0.103784	0.0223419
0.0414536	0	0.0288879	0.0227888	0.0377992	0.0201823
0.0276373	0	0.0245003	0	0.0282007	0.0206236
0	0.0218227	0	0	0.0279654	0.0205338
0	0.0223444	0	0.0211364	0.0079408	0
0.065747	0.0241003	0.0695331	0.0231568	0.0634459	0.0209606
0	0	0.0216856	0.0217597	0.0121178	0
0.0139188	0.0196889	0.0216893	0.0212605	0	0.0195187
0.0322565	0	0.0341651	0	0.0421057	0.0209528
0.0194575	0	0.0125122	0	0.00765308	0.0199379
0.0604467	0.0231712	0.061151	0.0232311	0.05649	0.0205673
0.0756576	0.0252904	0.0603582	0.0233371	0.0569272	0.0214467
0.114455	0.0252243	0.0910152	0.0248299	0.085325	0.0216975
0.0459736	0.0234139	0.0289657	0	0.0609421	0.0209704
0.0709355	0.0247003	0.0802607	0.0233882	0.0622412	0.0210466
0.105044	0.024916	0.0955927	0.024079	0.100555	0.0218569
0.0353579	0.0232044	0.0629352	0	0.0784104	0.0214651
0.078331	0.0238168	0.0835857	0.0236681	0.0619172	0.0213212
0.0367912	0.0224405	0.046565	0.0226375	0.0563372	0.0205655
0.10487	0.0251453	0.107052	0.0244761	0.0944819	0.0224793
0.123502	0.0247148	0.0919255	0.0246656	0.0769347	0.0216245
0.137269	0.0249565	0.0996654	0.0245195	0.122363	0.0225339
0.0547285	0	0.0645446	0.0243554	0.0664578	0.0212426
0.0124788	0	0	0.0226895	0.0190311	0.0204788
0.0517728	0	0.0452329	0.0231332	0.0668722	0.0210465
0.115355	0.0248644	0.0859739	0.0245469	0.0993656	0.0218545
0.0648972	0	0.0719989	0.0246588	0.0663905	0.0214548
0.116683	0.0257647	0.0978958	0.0242661	0.0820117	0.0213014
0.101336	0.0246517	0.0926742	0.023223	0.108488	0.0217864
0.116553	0.0251154	0.109208	0.0238005	0.114941	0.0228815
0.0598343	0	0.06142	0	0.0641609	0.0208114
0.0699305	0.0245559	0.0762712	0.0238987	0.0691255	0.021574
0	0.0205877	0	0	0.00981931	0.0197306
0.0627644	0.0243717	0.0762668	0.0232527	0.0666931	0.0212502
0.013007	0	0	0	0.0365285	0.0208851
0.0701825	0.023503	0.0704063	0.0235251	0.0728912	0.0211287
0.11204	0.0251269	0.0835323	0.0230404	0.0946857	0.021867
0	0	0.0152884	0.0223424	0.0121344	0
0	0.0226493	0	0.0228532	0.00967065	0.0193044
0.033135	0	0.044398	0	0.0457458	0.0204741
0.0124876	0.0217371	0.021186	0.0216151	0.0160953	0.0198416
0	0.0214838	0	0	0.0100291	0
0.100691	0.0238125	0.0972723	0.0246222	0.113385	0.0224834
0.0504845	0	0.0639773	0.0242433	0.0683316	0.0212301
0.125585	0.0252743	0.119209	0.0243689	0.117785	0.0222267
0.113934	0.0243395	0.115527	0.0254029	0.114426	0.0226531
0	0.0219077	0	0.0215527	0.00668273	0.0188825
0.0573152	0.0230449	0.0443392	0	0.0538518	0.020839
0.0680576	0.0226237	0.0861227	0.0236247	0.0928738	0.0220184
0.0853977	0.0245674	0.0655687	0.0242251	0.0798253	0.0216447
0.0717325	0.0243395	0.0708839	0.023869	0.076186	0.0217114
0.0545017	0.0228415	0.0564846	0.0231773	0.0728129	0.0211649
0.0963217	0.0246457	0.0952476	0.0244031	0.10652	0.0219681
0.0779656	0.0233405	0.0801406	0.024181	0.0865391	0.021431
0.117129	0.0254124	0.1144	0.0244647	0.133445	0.0227784
0.05211	0.0238352	0.0505637	0	0.0600346	0.0218569
0.0512973	0.0236252	0.0404319	0	0.0511038	0.0207806
0.0142934	0.0226756	0	0	0.0100049	0.0196757
0.0448782	0	0.0651568	0.0234632	0.0668367	0.0215503
0.0717569	0.0232019	0.0681115	0.0234387	0.0628119	0.0213611
0.0409589	0.02325	0.0273943	0.0217581	0.0273781	0.020208
0.0602156	0	0.0496083	0	0.0300291	0
0.0636312	0.0242151	0.0715392	0.0239534	0.0507793	0.0209294
0.122835	0.0244753	0.107633	0.0243597	0.122531	0.0224894
0.162214	0.0275565	0.141136	0.0254678	0.147822	0.0234744
0.052122	0.023994	0.0473888	0	0.0567235	0.0213261
0	0	0	0.0202798	0.00966815	0.0193964
0.0196798	0	0	0	0.0108169	0.0189828
0.179192	0.0286711	0.150951	0.0266066	0.144802	0.0234784
0	0.0227835	0	0	0.0251862	0.0198615
0.105057	0.0252245	0.105213	0.0252031	0.131793	0.0232521
0.0771327	0.0240893	0.0657198	0.0237974	0.097643	0.021951
0.0838228	0.0247525	0.0819713	0.0235052	0.0762292	0.0215002
0	0	0	0	0.00726256	0.02021
0	0	0	0	0.00842735	0.0192331
0	0	-0.0125198	0	0.00935566	0
0.0118096	0.0226088	0.0164555	0	0	0
0.0995432	0.0242	0.0720905	0.0231931	0.0950549	0.0221205
0.0600754	0.0243865	0.0640141	0.0230032	0.0909854	0.0219366
0.0268637	0.0229457	0.0217428	0	0.0320295	0.0204296
0	0.0218993	0	0.0219715	0.00861303	0.0195783
0	0	0	0	0.0130951	0.0197566
0.171219	0.0280676	0.142095	0.0264149	0.133734	0.0232521
0.0327144	0	0.0374996	0	0.0363548	0.0204743
0.0497642	0.0230813	0.0262268	0	0.0555866	0.020836
0	0	0	0	0.0287241	0.0203763
0	0.022303	0	0	0	0.0196094
0.051384	0.0236418	0.060045	0	0.065069	0.0209131
0	0	0	0	0.00751809	0.019078
0.0159317	0	0	0.0214102	0.0077134	0.0197281
0.0326531	0	0.0433302	0.0232092	0.0624676	0.021055
0	0	0	0	0	0
0.0423273	0.0228499	0.0346652	0.0225567	0.0441088	0.0207641
0.0925119	0.024718	0.0542637	0.0238978	0.0579579	0.0216699
0.108517	0.0244445	0.103532	0.0242013	0.101803	0.0216438
0.054189	0	0.0345246	0.0229211	0.065328	0.0212465
0.0574799	0	0.045336	0.0230656	0.0633579	0.0212233
0.126874	0.0257295	0.09362	0.0244432	0.106461	0.0224115
0.0477746	0.0233029	0.0792414	0.0233514	0.103964	0.0220359
0.0648644	0	0.077442	0	0.0637776	0.0211299
0.0431174	0	0.0421646	0.0225661	0.06217	0.0203151
0.112446	0.0246835	0.091231	0.0246235	0.103533	0.0225287
0.0996638	0.0245361	0.0673463	0.0240073	0.0708154	0.0213304
0.167983	0.0273309	0.137	0.0257599	0.15499	0.0234724
0.0708955	0.0240711	0.0965116	0.0237108	0.0874606	0.0216418
0	0	0.0151216	0.022377	0.0166453	0.0202111
0.0470816	0	0.0614145	0.0237899	0.0808657	0.0214584
0.156239	0.0263134	0.108591	0.0249909	0.116905	0.022527
0.0935957	0.0244233	0.0619272	0.0237494	0.0752204	0.0214315
0.113924	0.0252521	0.0981053	0.0238316	0.0956625	0.0218985
0.133113	0.025424	0.124099	0.0252761	0.141126	0.0232725
0.148086	0.0265252	0.106519	0.0251461	0.139749	0.0230642
0.0982464	0.0246029	0.0733746	0.0243415	0.0848684	0.0211178
0.0738479	0.0239099	0.0650972	0.0236901	0.0738761	0.0215406
0	0	0	0.0214353	0	0
0.0810628	0.0244786	0.0654097	0.0233181	0.0674188	0.0211804
0.0167881	0	0	0.0235091	0.0434517	0.0211306
0.0390779	0.0234972	0.0535716	0.0240656	0.0718924	0.0211195
0.0983662	0.0243358	0.0838541	0.0244067	0.10977	0.0226621
0.0163663	0.0227286	0	0	0.0100904	0
0.0307545	0	0	0	0.0104539	0.0192611
0.0215845	0	0.0472678	0.0230351	0.0574198	0.0206419
0	0	0	0	0	0.0196412
0	0	0	0	0.0116821	0.0192967
0.125519	0.0257192	0.129153	0.0252875	0.156243	0.0237532
0.047407	0.0238695	0.0474321	0	0.0671663	0.0209723
0.166023	0.0277085	0.142307	0.0260908	0.153099	0.023537
0.127793	0.0257171	0.112067	0.0252898	0.136102	0.0231571
0	0.0218332	-0.01291	0	0	0.0190529
0.0525638	0	0.0422249	0.0232399	0.0694411	0.0210223
0.0748883	0.0239983	0.102351	0.0247262	0.117095	0.0223109
0.103862	0.0253165	0.10688	0.024733	0.12835	0.0229571
0.105257	0.0249643	0.065359	0.0240758	0.0807	0.0214921
0.0768522	0.0233724	0.073332	0.0236572	0.0978371	0.0220632
0.129355	0.0259381	0.0919279	0.0239366	0.127173	0.0228803
0.0711829	0.024126	0.0641749	0.0236368	0.0973975	0.0219336
0.168637	0.0276923	0.127723	0.025518	0.149162	0.0230763
0.0915524	0.024718	0.0574143	0.0235806	0.0718587	0.0214496
0.0784686	0.0247089	0.0496205	0.0230695	0.060948	0.0211768
0.016325	0	0	0	0.0180512	0.0197495
0.0392144	0.0238031	0.0511255	0.0239942	0.0851242	0.0218646
0.0395924	0.0235591	0.0477448	0.0232687	0.0603896	0.0215319
0.0562955	0.0235786	0.019419	0.0219029	0.0258087	0
0.0875666	0.0247439	0.0454009	0	0.028062	0
0.0827584	0	0.0716658	0.0230306	0.0706337	0.0215689
0.18553	0.0285672	0.16967	0.0265838	0.161306	0.0237633
0.079493	0.0242335	0.10719	0.0257218	0.100657	0.0218569
0.0151738	0.0220265	0	0.0207291	0.014415	0
0	0	0	0.0209443	0.0122097	0.018865
0.353449	0.0367977	0.370861	0.0409973	0.327077	0.031929
0.0137426	0.0223689	0.0118089	0.0228451	0.0299138	0
0.186345	0.0283485	0.199525	0.0290415	0.244585	0.0279664
0.122723	0.0251048	0.125663	0.0249817	0.168971	0.024388
0.153425	0.0262489	0.177255	0.0273825	0.143121	0.0234319
0	0	0	0	0.0148901	0
0.0188693	0	0	0.0212727	0.00907015	0.0191508
0.0169844	0	0	0	0.0168603	0.0200006
0	0.0223205	0	0.0221257	0	0
0.124129	0.0257632	0.0900851	0.0237523	0.121645	0.0221751
0.105757	0.0248446	0.14641	0.0259995	0.14786	0.0230702
0.0393344	0	0.0179741	0	0.0409685	0.0206512
0	0	0.0266439	0.0221685	0.0171962	0
0	0.0222715	0	0	0.0115224	0.0194601
0.301546	0.034433	0.293391	0.0357599	0.267459	0.0299285
0.0626717	0.0233837	0.0443445	0.0231755	0.0588841	0.020405
0.0627382	0.0230941	0.0251599	0	0.0541108	0.020584
0	0.0222803	0	0.0224345	0.0396686	0.0205694
0.0135058	0	0	0.0213103	0.00913114	0
0.095058	0.0237411	0.107029	0.0245618	0.123206	0.0226595
0	0	0	0.0211961	0	0
0	0.0202036	0	0	0	0
0.0602972	0	0.0376961	0.0231385	0.0670655	0.021379
0.011838	0	0	0	0.018854	0.019927
0.0818577	0.0231399	0.07547	0.0231288	0.0794045	0.0212966
0.133055	0.0258276	0.118476	0.0247764	0.0990679	0.0219912
0.243658	0.0300352	0.322668	0.0333957	0.250428	0.0269664
0.0674319	0.0234961	0.0462799	0.0233023	0.0998475	0.0218251
0.101379	0.0246413	0.119254	0.0243368	0.109843	0.022074
0.212076	0.0290378	0.182379	0.0287243	0.201407	0.026168
0.0763548	0.0233816	0.131539	0.0243054	0.185201	0.0248123
0.127674	0.0252083	0.101777	0.0240917	0.109002	0.021482
0.0610301	0.0221402	0.0801864	0.0235863	0.101007	0.0212093
0.205596	0.0274944	0.239636	0.0291921	0.22253	0.0259356
0.163229	0.0266794	0.15448	0.02623	0.130636	0.0226924
0.411244	0.0406533	0.431553	0.0440096	0.36736	0.0347721
0.115143	0.0250403	0.142779	0.0262647	0.151183	0.0231277
0.0222833	0	0.0246293	0	0.0254939	0
0.0757323	0.023505	0.0859465	0.0248628	0.128852	0.0224749
0.307946	0.0322344	0.287179	0.032613	0.276734	0.02832
0.139575	0.0263042	0.141577	0.026319	0.136462	0.0227085
0.249743	0.0288457	0.257934	0.0305317	0.219094	0.0256833
0.238015	0.0300524	0.232998	0.0315313	0.251988	0.0276777
0.249324	0.0313527	0.243429	0.030963	0.265202	0.0283038
0.111783	0.0247387	0.104434	0.0244898	0.108442	0.0221413
0.127725	0.0245914	0.11506	0.0250183	0.136381	0.0229611
0	0	0	0.021269	0.0102985	0.019264
0.147192	0.0256089	0.127866	0.0252784	0.135981	0.022793
0.0186831	0	0.0240151	0	0.0660772	0.0211427
0.061274	0.0237887	0.118228	0.0248239	0.118874	0.0221901
0.169151	0.0263617	0.177324	0.0258489	0.201429	0.025194
0.0203944	0.022837	0.0162912	0	0.0278298	0
0.0179548	0	0.0109438	0.0219854	0.0100895	0.0192345
0.0454597	0	0.0758696	0.0227023	0.0881642	0.0211402
0	0.0212379	0	0	0.0133103	0
0	0	0	0.0218771	0.00618285	0
0.204882	0.0288061	0.240602	0.0312346	0.275241	0.0292333
0.0808278	0	0.0897567	0.0246691	0.122367	0.0223284
0.357292	0.0371863	0.389195	0.0412437	0.332129	0.0332
0.224495	0.0290276	0.229903	0.0304222	0.259688	0.0279421
0	0.0220231	0	0	0	0
0.0869751	0.02408	0.0821772	0.0241139	0.111109	0.021687
0.122627	0.0237161	0.196749	0.0285828	0.20203	0.0246715
0.14069	0.0259105	0.13155	0.0246623	0.155138	0.0231208
0.160132	0.0261775	0.131246	0.0262392	0.146327	0.0227752
0.118393	0.0246505	0.128303	0.0255865	0.160342	0.0236499
0.200209	0.0283323	0.20362	0.0277476	0.22204	0.0263013
0.132225	0.0257754	0.138821	0.0249378	0.169925	0.0235014
0.265352	0.0326189	0.279795	0.0338407	0.276896	0.0300639
0.121858	0.0251186	0.0914893	0.0236673	0.110739	0.0223792
0.112943	0.0246881	0.100291	0.0243149	0.0977591	0.0220646
0.0197756	0	0	0	0.0132037	0
0.0672965	0.0235885	0.117781	0.0243228	0.127396	0.0226106
0.0848664	0.0229817	0.092027	0.0238931	0.0884846	0.0221748
0.0892211	0.0241312	0.0244379	0.021827	0.0297236	0
0.140396	0.0258835	0.0990597	0.0241465	0.0481141	0.0204762
0.126308	0.0259496	0.11654	0.0251734	0.111747	0.0221933
0.371749	0.0392606	0.39518	0.0438613	0.346969	0.0338708
0	0.0223739	0	0.0215125	0	0.0199868
0	0.0220665	-0.0109292	0.0213887	0.013167	0.0191133
0.0978028	0.0250006	0.118605	0.0243632	0.102142	0.0214396
0	0.0228935	0	0.022362	0.0170671	0
0.0703253	0.0236463	0.0774245	0.0242582	0.0904552	0.0213687
0.0491995	0.0240836	0.0659746	0.0234134	0.0686461	0.0212858
0.0584542	0	0.0921639	0.0245687	0.0593356	0.021081
0	0.0227209	0	0.0218443	0	0.0198919
0	0.0220121	0	0.022348	0	0.0193401
0	0	0	0.022393	0.00860137	0
0	0.0227462	0	0.0226608	0.007708	0.0194571
0.0576079	0	0.049292	0.0235349	0.0618577	0.0210929
0.0442682	0	0.0732028	0.0246601	0.0633208	0.0210931
0.0215836	0.0226029	0.0238051	0.0222334	0.0199647	0.0199719
0	0.0236241	0.0165822	0.0224503	0.0144319	0.0197411
0.0161478	0.0230298	0	0	0.00621064	0.0198533
0.089599	0.0245536	0.100864	0.0249501	0.0871544	0.0215206
0.0311492	0	0.030776	0	0.0314578	0.0200114
0.0308777	0	0.0121718	0.0230932	0.0299338	0.020338
0	0.0220034	0.0183176	0.0230296	0.0231807	0.0202847
0	0.0226997	0	0.0210667	0.0075859	0.0196252
0.0452841	0	0.0470283	0	0.0584978	0.0205713
0	0.0225493	0	0.0223114	0	0.0196755
0	0.0194961	0	0.0227806	0.0125051	0.0201926
0.0274518	0	0.0121598	0	0.0275429	0.0204856
0.0127675	0.0232133	0	0.0224905	0.0169198	0.0202234
0.0362533	0.0235536	0.0697562	0.0231072	0.0481253	0.0205702
0.0429697	0.0241782	0.0541553	0.0238655	0.0462809	0.0208318
0.0662623	0.0240174	0.0988539	0.0246007	0.0726011	0.0210042
0.0366971	0	0.0274057	0	0.0478	0.0210006
0.0935491	0.0241077	0.0982768	0.0249989	0.0840741	0.0212188
0.082322	0.0238774	0.0736908	0.0234636	0.075848	0.0216462
0.0339517	0	0.0512542	0.0232183	0.0626961	0.0209455
0.0501702	0	0.0818005	0.0242765	0.0640256	0.0214638
0.0284709	0	0.0339908	0.0230266	0.0387321	0.0198723
0.0922899	0.0237269	0.104283	0.025409	0.0833001	0.0212674
0.0744927	0.0242197	0.116908	0.0250597	0.0637772	0.0209615
0.0921197	0.0248575	0.107831	0.0243952	0.103414	0.0219481
0.0375527	0	0.0576101	0	0.0612878	0.0209106
0.0126689	0	0.0173838	0.0225618	0.0136957	0.0201503
0.0266323	0.0234968	0.0487307	0.0241527	0.0541325	0.0206871
0.0914879	0.024374	0.097052	0.0249067	0.0884688	0.0214408
0.0645415	0	0.0701107	0.0249181	0.0634369	0.0209513
0.0658313	0	0.097073	0.0248336	0.0624839	0.0209556
0.0680128	0.0236958	0.0903716	0.0240184	0.089433	0.0211238
0.0929629	0.025546	0.109763	0.0259981	0.0935873	0.0214416
0.0438987	0	0.0602245	0.0232794	0.0562341	0.0208635
0.0903087	0.0243325	0.107161	0.0252172	0.0804502	0.0212451
0	0.0204786	0	0	0.0097547	0.0195056
0.0733345	0.0241552	0.0872686	0.0244066	0.0756559	0.0210399
0.014748	0	0.0153237	0.0237484	0.0335984	0.0208219
0.0238589	0	0.0738207	0.0242345	0.0508041	0.0204512
0.0693715	0	0.0831734	0.0240595	0.0749815	0.0213991
0.0133903	0	0	0.0232515	0.015944	0.0201024
0	0.0234239	0.0113069	0.0219755	0.00937157	0.0196993
0.0173858	0	0.0357448	0.0228828	0.0412874	0.0205909
0	0.0212683	0	0	0.00819209	0
0	0.0210782	0	0.0226167	0	0.0189621
0.0743272	0.0233694	0.0962952	0.0248793	0.0908848	0.0217353
0.0367738	0	0.0647134	0.0243952	0.0570554	0.0210968
0.0884783	0.0250325	0.116945	0.0252149	0.106416	0.0216118
0.0787154	0.0241506	0.112703	0.0245802	0.0998833	0.0216746
0	0.0228166	0	0.0212305	0.00715148	0.0189179
0.0525338	0.0241068	0.0480424	0	0.0495224	0.0204423
0.0541355	0	0.0753431	0.02416	0.0701114	0.0210567
0.0536022	0	0.0597535	0.0243701	0.0710833	0.0213018
0.0597122	0	0.0613117	0.0233494	0.0728457	0.0210992
0.0584884	0.023077	0.0727245	0.023501	0.0750906	0.0213556
0.0898106	0.0238628	0.113538	0.0245665	0.0947637	0.0215044
0.0546901	0	0.0703955	0.0239995	0.0786486	0.0207606
0.0965013	0.0237568	0.109371	0.0243495	0.101752	0.0217293
0.0429842	0.0236325	0.0477389	0.0234134	0.0602812	0.0209169
0.0387147	0	0.0467687	0.0235383	0.0491911	0.0203796
0	0.0225773	0	0.0215857	0	0.0197636
0.0115777	0	0.047872	0	0.0616373	0.0210144
0.0390443	0.0228566	0.0627489	0.0238264	0.0473923	0.0208876
0.037036	0.0235774	0	0.0225071	0.0144289	0.0198972
0.0585942	0.024089	0.0422104	0.0235458	0.0259312	0
0.0524504	0.0246756	0.0603287	0.0230937	0.0559359	0.0206961
0.0940103	0.0251361	0.122117	0.0245665	0.10081	0.0216543
0	0.050816	0	0.0326894	0	0.0303014
0	0	0.0126398	0.0204388	0	0.0194282
0	0.0676887	0	0.0288969	0	0.0226272
0	0.0217622	0	0	0.0136187	0
0	0.0221559	0	0.0207464	0.00994798	0.0198932
0	0.0215377	0.0138084	0.0205013	0.0114323	0.0196706
0	0.0386149	0	0.0245488	0	0.0211149
0	0.0469193	0	0.0351566	0.00631642	0.0272927
0	0.032272	0	0.0249222	0	0.0210174
0	0.0278507	0	0.0231623	0	0.0246483
0	0.0223802	0.0176027	0.0203345	0.0123345	0.0197249
0	0.0222964	0	0.020751	0.0129493	0.0194273
0	0.0280352	0	0.0230713	0.00925891	0.020977
0	0.0805303	0	0.0303062	0	0.028831
0	0.0309147	0	0.0227327	0.00683651	0.0230365
0.0151495	0	0	0.0203157	0.012357	0
0	0.0219798	0	0.0213921	0.00992358	0.0204837
0	0.0239593	0	0.0228381	0	0.0206828
0	0.0406046	0	0.0254687	0	0.0218764
0	0.0291703	0	0.0268708	0.00800788	0.0244043
0	0.0236182	0	0.0203382	0.0105973	0.0193834
0	0.0434827	0	0.0306571	0.0100866	0.0336913
0	0.0446636	0	0.0337438	0	0.0375772
0.0172679	0.0230437	0	0.0207668	0	0.0200876
0	0.0272707	0	0.023349	0	0.0229782
0	0.0341301	0	0.0246761	0	0.0226568
0	0.0224802	0	0.0207281	0	0.0195371
0	0.021732	0	0	0.00746864	0.0194232
0	0.0256969	0	0.0233231	0	0.0199391
0	0.0228194	0	0.0214628	0	0.019711
0.0115339	0.0216577	0	0.0206268	0.00829609	0.0193544
0.0116877	0.0243485	0	0.0203502	0.0122143	0.0195908
0	0.0223206	0	0.0203372	0	0.0194779
0	0.0239674	-0.0112117	0.0215719	0	0.0205737
0	0	0	0	0.0114987	0.0195755
0	0.0216362	0	0.0205716	0	0.0196294
0	0.0219686	0	0	0.0118709	0.0195709
0	0	0	0.0204273	0.0123274	0.0192424
0	0.0291037	0	0.0229222	0	0.0203816
0	0.0235163	0.0121925	0.0206208	0	0.0200052
0.0169744	0.0229368	0	0	0.00798054	0.0201167
0	0.0218857	0	0.0208304	0	0.0194773
0.0130785	0.0222851	0	0	0.00890726	0.0193103
0	0.0218378	0	0.0206856	0.0137497	0.0197166
0.0152064	0	0	0.0202151	0	0.0193985
0	0.0215461	0	0.0207547	0	0.019873
0.0149282	0.0228613	0.0188343	0.0203609	0.00683513	0.0195396
0	0.0381466	0	0.0254734	0	0.0217617
0	0	0	0.0204197	0	0.0199833
0	0.0219331	0	0.0206363	0.0127272	0.0195513
0	0.0231718	0	0.0212424	0.00923331	0.0194275
0	0	0	0.020525	0.0117092	0.0196292
0	0.0253577	0	0.020966	0	0.0208806
0	0.0437708	0	0.0348881	0	0.0297952
0	0.0229775	-0.0181428	0.021135	0	0.0198264
0	0.0377582	0	0.0258542	0	0.0226768
0	0.0455005	0	0.0299971	0	0.0266984
0	0.0217567	0	0	0.0115887	0
0	0	0	0	0.00623018	0.0199392
0	0	0.0148446	0	0.00841991	0.0192909
0	0	0	0	0.00879423	0.0194468
0	0.0710239	0	0.0333067	0	0.0317931
0	0.0249967	0	0.0207336	0.0120401	0.0207037
0	0.022772	-0.0138557	0	0.0151275	0.0193177
0.01477	0.0216471	0	0	0.00789775	0
0	0.0222632	0	0.0209503	0	0.0195534
0	0.0244089	0	0.0203419	0.0096187	0.0196666
0	0.0225256	-0.0115383	0	0.00832894	0.0196618
0	0.0218173	0	0	0.0145698	0.0195371
0	0.0219164	0.0110264	0.0199675	0.012713	0.0193807
0	0	0	0	0	0.0191958
0	0.0225612	0	0.020452	0	0.0198797
0	0.0368775	0	0.0252967	0.00801628	0.026397
0	0.022152	0	0.0201858	0.00771783	0.0196911
0	0.0246087	0	0.0205864	0.00974671	0.0196815
0.0203317	0.0247308	0	0.021741	0	0.0234178
0.012205	0.0216187	0	0	0.00764692	0.0195441
0	0.0223091	0	0.0202305	0	0.0194037
0	0	0	0.0203011	0.0106068	0.0194997
0	0	0.0132731	0	0.0163901	0.0189085
0	0.0571526	0.0169452	0.0288771	0	0.0213698
0	0.0215433	0	0	0.0131921	0
0	0.0216292	0	0.020669	0.0086898	0.0188275
0	0	0	0	0.00617859	0.0186324
0	0.0334224	0.0174764	0.0267663	0.00627084	0.0195258
0	0.04159	0	0.0351991	0.00875468	0.0259475
0	0.0308057	0	0.0251022	0.00979878	0.0201068
0	0.0264575	0	0.0269935	0	0.0229979
0	0.022021	0	0.0206082	0.00752338	0
0	0	0.0146872	0.0205663	0.0074523	0
0	0.0265781	0.0163157	0.0246836	0.0103761	0.0200023
0	0.0685805	0.0179497	0.0306616	0.0140915	0.0264438
0	0.029112	0.0263744	0.0232077	0.0113597	0.0209931
0	0.0214411	0.0114527	0	0.0186255	0
0	0.0208413	0	0.0210027	0.00955301	0.0190854
0.0129253	0.0220023	0	0.021861	0.0135424	0.0196085
0	0.0367745	0	0.025674	0.00828004	0.0200976
0	0.0287538	0	0.0272155	0	0.0221066
0	0.0211309	0	0	0.00719761	0.019059
0	0.0405456	0.0147379	0.033549	0	0.0300961
0	0.0388245	0.0199995	0.0349876	0.0116011	0.0331728
0	0.0218041	0	0.0210629	0.0130888	0.0186659
0	0.0255441	0.01782	0.0237651	0.0114053	0.0216976
0	0.0323041	0.0131113	0.0251032	0.00776636	0.0214362
0	0	0	0	0	0.0189981
0	0.0217908	0	0.0205103	0	0
0	0.0241517	0	0.0234275	0	0.0188251
0	0.02131	0	0.0204967	0.012957	0.0190869
0	0	0	0	0.0110993	0.0188739
0	0.0240821	0	0	0.0104185	0.0188803
0	0.0209713	0	0.0203468	0	0.0188982
0	0.0227895	0	0.0218003	0.0106734	0.0196578
0	0.0213498	0	0.0203945	0.00802653	0.0188593
0	0.021359	0	0	0.00876156	0.0188549
0	0.0215207	0	0.0206804	0.0154433	0
0	0	0	0.0204573	0.0100734	0.0190366
0	0.0290327	0	0.0233459	0	0.0196878
0	0.0226748	0	0.0212897	0.0112421	0.0191747
0	0	0	0.0205549	0	0.0186045
0	0	0	0	0.00813234	0.0189544
0.016587	0.0216423	0	0	0.015964	0
0	0.0212909	0	0	0.0136927	0.0188371
0.0120924	0.0213522	0	0	0.0118105	0
0.0130853	0.0224449	0	0	0.0109591	0.0187064
0	0	0	0.0212292	0.0152666	0
0	0.0329674	0	0.0290399	0	0.0200463
0	0.0210954	0	0.0213453	0	0.0192463
0	0.0217386	0	0.0216292	0.0105207	0.0191898
0	0.0212221	0	0.0206408	0.00752868	0.0188113
0	0.0211594	0	0.0207919	0.0092336	0.0189398
0	0.024332	0	0.022931	0.00792145	0.0201488
0	0.0401437	0.0220552	0.036289	0	0.0281272
0	0.0220506	0	0.020059	0.00746173	0.0191659
0	0.0348267	0	0.025635	0	0.02236
0	0.0420031	0	0.0306104	0	0.0243742
0	0.0213584	0.0178722	0	0.012684	0.018764
0	0	0	0.0210489	0.0104423	0.018668
0	0.0218339	0	0	0.0154961	0.0186932
0	0	0	0.0205739	0.0146396	0
0	0.0522042	0.0167427	0.0364431	0.00680236	0.026909
0	0.0245765	0	0.02086	0.0126967	0.0198831
0	0.0211597	0.0114441	0	0.00695143	0.0186445
0	0.0216168	0.0139487	0	0.00799068	0.0187941
0	0.021534	0	0	0.0131371	0.0188655
0	0.0233039	0	0.0214214	0.00958385	0.0188705
0	0.0217872	0	0.020587	0.00822348	0.0187008
0	0.0211652	0	0.0212633	0.00970625	0.0189716
0	0.0212772	0	0.0203027	0.0147365	0.0186847
0	0	0	0	0	0.0188358
0	0.0215236	0.0167352	0.021011	0.0100169	0.0191547
0	0.0342309	0	0.0279023	0	0.0242424
0	0.0208193	0	0	0.00939913	0.0189601
0	0.0242949	0	0.0211931	0.010075	0.0187747
0	0.0219143	0.012881	0.0225797	0	0.0222071
0	0.0214455	0	0.0208883	0.00658692	0.0187157
0	0.021184	0	0.0207337	0.0104271	0
0	0	0.0144681	0.0204699	0.0176901	0.0186492
0	0.0226036	0.014927	0	0.0265669	0
0.187297	0.0291085	0.223623	0.0309174	0.243402	0.0281381
0.127284	0.0251949	0.123861	0.024822	0.166468	0.0237656
0.162866	0.0272483	0.171059	0.0267184	0.142457	0.0230965
0	0	0	0	0.021333	0
0	0.0215515	0	0	0.0077668	0.0191659
0.0232541	0.0211356	0	0.0220834	0.0183001	0
0	0	0	0	0	0
0.142649	0.0262193	0.102249	0.0243205	0.115612	0.0219164
0.117225	0.0250083	0.169141	0.0267252	0.158118	0.023535
0.0314965	0.0229358	0.0234008	0	0.035596	0.0207529
0	0.021313	0	0.0227965	0.0164482	0.0198389
0.019532	0	0.0172578	0	0.0133632	0.0197618
0.315319	0.0352184	0.319641	0.0380146	0.265263	0.029684
0.0619376	0	0.0581844	0	0.058506	0.0204783
0.0724589	0.0236017	0.0473189	0.0227429	0.0494245	0.0207181
0	0	0.0149464	0	0.0393103	0.0204189
0.0271445	0.0218936	0	0	0.0116603	0.0198789
0.102408	0.0246467	0.10157	0.0243382	0.118023	0.022421
0	0	0	0.0210055	0	0.0190369
0	0.0195433	0	0	0.00643817	0.0197356
0.0687521	0.0234704	0.0525812	0	0.0615847	0.0210489
0	0	0	0.0227813	0.0196982	0.0199914
0.0618873	0.0232406	0.0856577	0.0230163	0.0780943	0.020758
0.14779	0.0260121	0.104988	0.0243222	0.0987634	0.0220417
0.257499	0.0301507	0.318039	0.03589	0.246386	0.027126
0.0802881	0.0238088	0.0740512	0.0234721	0.107168	0.0217745
0.110582	0.0252017	0.10678	0.0247886	0.0991756	0.0222034
0.218745	0.0287066	0.207172	0.0296052	0.198148	0.0258063
0.0838339	0.0233356	0.140899	0.0260444	0.183075	0.0251417
0.119178	0.0248357	0.118184	0.0242058	0.0988175	0.0218886
0.0780304	0.0229014	0.10284	0.0240212	0.104075	0.0212257
0.215823	0.0277986	0.238414	0.0304382	0.223087	0.0258063
0.16197	0.0272322	0.156772	0.0259653	0.116586	0.0222721
0.395153	0.0397652	0.370961	0.041189	0.342671	0.0329191
0.131112	0.0256529	0.148081	0.0254567	0.149865	0.0232631
0.0379103	0	0.0350844	0	0.0290161	0.0202609
0.080121	0.0241359	0.113365	0.0239337	0.137581	0.0226065
0.337978	0.0345485	0.29682	0.0328845	0.262412	0.0271732
0.146134	0.025844	0.136082	0.0258512	0.13613	0.0226156
0.246976	0.0289612	0.262783	0.0309904	0.211227	0.0257075
0.252848	0.0316969	0.266805	0.0332542	0.254108	0.0281546
0.25671	0.0317514	0.271262	0.031796	0.257313	0.0284877
0.131304	0.0256092	0.10508	0.0251449	0.100825	0.0219613
0.138584	0.0252662	0.131277	0.0262232	0.1318	0.0227692
0	0.0206152	0	0	0.00705718	0
0.152972	0.0265278	0.14377	0.0255819	0.130854	0.0230699
0.0225323	0	0.03284	0	0.0656676	0.0211306
0.0623597	0.0234303	0.127991	0.0251642	0.12373	0.0225928
0.173166	0.0272069	0.181699	0.0267138	0.198855	0.0254708
0.0138968	0.0232333	0.0185167	0	0.0257061	0.0202088
0.0175347	0	0	0	0.0108231	0.0193641
0.0422947	0	0.0891406	0.0237874	0.0901127	0.0212948
0	0.0213245	0	0	0.0159709	0
0	0	0	0	0	0
0.2133	0.0285019	0.270012	0.0311547	0.278149	0.0298032
0.0853282	0.0239942	0.104915	0.0242697	0.119791	0.0222173
0.447563	0.0464668	0.500492	0.0548152	0.413837	0.0397005
0.245315	0.0307799	0.264704	0.0319694	0.254142	0.0275137
0.0137301	0.0218761	0	0.0211166	0	0.0187925
0.0892429	0.023781	0.0973615	0.0238806	0.112268	0.0219099
0.133722	0.0242132	0.224327	0.0291351	0.20361	0.0253538
0.149926	0.0270089	0.143736	0.0251073	0.156544	0.0232986
0.155152	0.0268731	0.140413	0.0273414	0.138838	0.0228742
0.143829	0.0245385	0.142275	0.0254331	0.162641	0.0239207
0.212504	0.0299534	0.218551	0.0294455	0.220018	0.0263902
0.12661	0.025026	0.145077	0.0264305	0.174106	0.0241063
0.292628	0.0343275	0.308079	0.0351712	0.27101	0.0292778
0.13014	0.0257404	0.0999455	0.024377	0.111109	0.0219285
0.115465	0.0242013	0.103644	0.0241135	0.106321	0.021645
0.0182193	0	0	0	0.0167273	0.019684
0.0767099	0.0242257	0.124367	0.0255163	0.123909	0.0228128
0.0855128	0.0234618	0.0843545	0.0232527	0.0931578	0.0215845
0.0962027	0.0237716	0.021217	0.0216628	0.030987	0.020151
0.152403	0.0262613	0.0969093	0.0239731	0.0452203	0.0207031
0.13751	0.0257888	0.123289	0.025728	0.108637	0.0218336
0.380327	0.0395902	0.405883	0.0449954	0.34122	0.033592
0	0.023035	0.0296633	0.0218953	0.034092	0.0197434
0	0.0234244	0.01207	0.0216388	0.0240659	0
0	0.0229626	0	0.0217359	0.0112121	0.0197105
0	0.0445573	0	0.0231736	0.00724073	0.019759
0	0.0520603	0	0.0321224	0	0.0216292
0	0.0375547	0	0.0248152	0.0126048	0.0198817
0	0.0307415	0.0124661	0.0235876	0	0.0205921
0	0.0231313	0.0109	0	0.0202874	0
0	0.0223718	0.032788	0.0228597	0.0269753	0.019992
0	0.032076	0	0.0249084	0.00929805	0.0206951
0	0.0983639	0.0567516	0.0317168	0.0209765	0.0217049
0	0.0324162	0.0152181	0.0241158	0	0.0196768
0.012149	0.022508	0.0229238	0.0215116	0.0219171	0
0.011514	0.0231086	0	0.0226326	0.0142063	0.0196099
0	0.0240169	0	0.0229102	0.0110169	0.0196163
0	0.0449918	0	0.0251162	0	0.0202301
0	0.0335322	0	0.0244385	0	0.0201853
0	0.0236689	0.0404345	0.0227466	0.0267882	0.0200405
0	0.0503572	0	0.0287563	0	0.0215264
0	0.0518013	0	0.027371	0.00787482	0.0233687
0	0.0246591	0	0.0213875	0.0125408	0.0202181
0.0121703	0.026852	0	0.0231275	0	0.0201374
0	0.0377905	0.0180736	0.0246188	0.0147495	0.0201502
0	0.0234746	0	0	0.0118419	0
0	0.0232161	0.0131266	0	0.0123727	0.0199252
0	0.0272246	0	0.023613	0.0274664	0.0199617
0	0.0246747	0	0.0214191	0.0194327	0.019799
0	0	0.0147938	0	0.0236507	0.0199322
0	0.0258896	0.0120813	0.0223632	0.0281216	0
0	0.0226677	0	0.021766	0	0.0196447
0	0.0246566	0	0.0223496	0.0260262	0.0197185
0	0.022417	0	0.0218931	0.0145075	0.0200701
0	0.0220673	0	0	0	0
0.016794	0.0226848	0	0.0218494	0.0293163	0
0	0.0221926	0.014544	0.0216775	0.0193055	0
0	0.0311452	0	0.0232741	0.0143143	0.0199064
0	0.0249553	0.0277772	0.0232056	0.029521	0.020097
0	0.0221237	0.0236646	0	0.0226562	0.019726
0	0.0234517	0	0.0221164	0.01238	0.0199903
0	0.0222181	0.0119656	0	0.0149394	0.0200395
0	0	0.0151968	0.0221994	0.0377675	0.0199595
0	0.0225585	0.0280081	0.0223172	0.0345477	0.0199232
0	0.0222919	0	0.0219152	0.0165099	0.0199013
0	0.0237472	0	0.0216473	0.0159806	0.0199256
0	0.0450315	0	0.024411	0.0089825	0.0194637
0.0124573	0.0226474	0.0156702	0.0222739	0.0170861	0
0	0.0243908	0.0108428	0.0214067	0.0177097	0.0196869
0	0.0226556	0.0154897	0.0218893	0.0231614	0.0197633
0.0174576	0.0226722	0.0226012	0.0222634	0.0247903	0.019821
-0.0160051	0.0268679	0.0265888	0.024357	0.00681623	0.019785
0.0117763	0.0490864	0	0.0310365	0.00793626	0.0213362
0	0.0256397	0	0.0229273	0.0218856	0.0196595
0	0.0431027	0	0.0238885	0.00834064	0.0200777
0.0128749	0.05325	0	0.0285967	0.00867346	0.020831
0.0186855	0.0222488	0.0183272	0.0220304	0.0300285	0
0	0.0223859	0.0163687	0.0219467	0.0148677	0.0198144
0	0	0	0.0214294	0.034245	0.0199361
0	0.022154	0.013185	0.0214019	0.0240964	0.0199875
0	0.0808245	0	0.0300617	0	0.0207783
0	0.0257944	0	0	0.033929	0.0205034
0	0.0232036	0.0313733	0.021778	0.0261686	0
0	0	0	0.0214926	0.0189049	0
0	0.0227032	0	0.021499	0.0121456	0.0198966
0	0.0263008	0.019664	0.0229447	0.0265185	0.0201915
0	0.0224887	0	0	0.027235	0.0199573
0	0.0215914	0.0221841	0.0215721	0.0247795	0.0200749
0	0	0.0191774	0	0.0315208	0
0	0.0224037	0	0	0.0124381	0
0	0.0228362	0	0.0225561	0.0166069	0.0195738
0	0.0418794	0	0.0244317	0.00804765	0.0213117
0	0.022911	0.017865	0	0.0256284	0.0202498
0.0116404	0.0265019	0	0.0216545	0.0164326	0.0199141
0	0.0243537	0	0.022121	0.0153065	0.0204425
0	0	0	0.0215533	0	0.0198976
0	0.0229657	0	0.0218805	0.0152238	0
0	0.022148	0.0158117	0	0.032308	0.0202157
0.0941288	0.0244001	0.101963	0.0250958	0.156596	0.0238363
0.1027	0.0252037	0.117443	0.0250639	0.129519	0.0231591
0	0.0216039	0	0.0217541	0.0179055	0
0	0	0	0.0211422	0.00767686	0.0191663
0.0119883	0.0215724	0.0127073	0.0219953	0.0200349	0.0200861
0.0158933	0.0225538	0	0	0.00617207	0.0197228
0.109889	0.0247663	0.0753109	0.0235446	0.108279	0.0228562
0.0789255	0.0245937	0.110225	0.025712	0.154743	0.0238603
0.0330219	0	0.022702	0	0.034313	0.0203605
0.0128901	0.0214468	0	0.0214918	0.0107756	0.0195008
0	0	0.031706	0.0232101	0.0180727	0
0.189857	0.0290023	0.204359	0.0293816	0.231544	0.0285786
0.0279242	0	0.0308245	0.0227303	0.0563216	0.0204743
0.0415304	0	0.0311951	0	0.0533334	0.0207344
0	0	0	0.022313	0.0307978	0
0.0133722	0.0216661	0	0	0	0.0198268
0.0726285	0.0242122	0.0942713	0.0243108	0.109701	0.0221683
0	0	0	0	0	0
0.0115036	0	0	0	0.00693912	0.0194774
0.0313752	0	0.0313178	0.0231248	0.0552975	0.0206318
0.0194988	0.023209	0	0	0.0100347	0
0.0478147	0	0.0562825	0.0223466	0.0767254	0.0204072
0.0985652	0.0246351	0.0681906	0.0250274	0.0924462	0.0217467
0.124618	0.0259113	0.155512	0.0261844	0.185248	0.0247456
0.0573538	0.0234544	0.0519316	0	0.100207	0.0220031
0.0700806	0.0237377	0.0720737	0.0232778	0.0969939	0.0222418
0.14892	0.0264087	0.133515	0.0264058	0.180014	0.0257477
0.0571355	0.0239285	0.115215	0.0247595	0.164494	0.024297
0.0810305	0.0241954	0.070457	0.0235509	0.0974209	0.0219352
0.0567711	0.0228742	0.0910885	0.0234567	0.0906943	0.0213383
0.129639	0.0249804	0.127458	0.0258991	0.174543	0.0248202
0.114775	0.0250334	0.0845976	0.0246235	0.114863	0.0225044
0.181769	0.0272181	0.193069	0.0293907	0.260992	0.0292919
0.0842123	0.024794	0.103646	0.0248565	0.12634	0.0228063
0.0302342	0	0.0320935	0.0232222	0.029075	0.0204777
0.0616288	0	0.0808588	0.0244861	0.120311	0.0222663
0.160677	0.0275335	0.156209	0.0272136	0.196897	0.0250898
0.102378	0.023933	0.0944497	0.0247147	0.117557	0.0228924
0.138638	0.02644	0.151854	0.0267526	0.159806	0.0242647
0.152892	0.0262898	0.162721	0.02733	0.211316	0.0260914
0.19763	0.0286592	0.213221	0.0302236	0.251148	0.0282493
0.0795726	0.0238478	0.0600317	0	0.0923955	0.0221251
0.0880104	0.024322	0.0879492	0.0247033	0.126822	0.0228904
0	0	0.0139981	0	0.0145868	0.0192095
0.0908529	0.0251301	0.096406	0.0246189	0.118534	0.0225444
0	0	0.0256898	0.0238766	0.0605877	0.021264
0.0563651	0	0.110241	0.0255798	0.10864	0.0223621
0.10474	0.0253188	0.122163	0.0263213	0.173566	0.0247858
0.0161813	0	0	0.0223409	0.025139	0
0	0	0	0.0217388	0.0206756	0.0193038
0.0369192	0	0.0568931	0.023097	0.0847838	0.0211951
0.011374	0.0212018	0	0	0.0099935	0
0	0	0	0	0.0135986	0
0.137529	0.0257884	0.189791	0.0286194	0.240017	0.0278977
0.0626406	0.0238027	0.103976	0.0249156	0.10993	0.0225649
0.193276	0.0286086	0.213471	0.0311958	0.250043	0.0284089
0.152519	0.0258023	0.171041	0.027476	0.228666	0.0271642
0	0.0217532	0	0	0	0.0187511
0.0721624	0	0.0892117	0.0247615	0.110006	0.0222585
0.0677152	0.0231468	0.169632	0.0269763	0.186542	0.0252323
0.10933	0.0249068	0.0860391	0.0241465	0.134736	0.0227085
0.113864	0.0248791	0.0869763	0.023811	0.130908	0.0231107
0.0948281	0.0232772	0.106437	0.0239455	0.144497	0.0233305
0.145765	0.0259243	0.139009	0.0263966	0.20262	0.0258669
0.0948205	0.0234131	0.118524	0.026079	0.16557	0.0236572
0.171376	0.0282748	0.181978	0.0291625	0.244979	0.0287322
0.0774868	0.0251554	0.0753734	0.0236696	0.0940808	0.0220033
0.0734866	0.0239863	0.0770644	0.0242554	0.0921584	0.0212883
0.0203715	0	0.0180848	0.0222613	0.0109488	0
0.0726604	0.0245301	0.0990393	0.025263	0.122748	0.0226612
0.0722179	0.0231404	0.0694806	0.0229371	0.0836978	0.0217563
0.0722868	0.0234578	0.0158516	0	0.0314782	0
0.0932547	0.024661	0.0614494	0	0.0481763	0.0207457
0.097683	0.0243658	0.0818422	0.0238384	0.0997594	0.0220013
0.188743	0.0288066	0.225617	0.0308466	0.258376	0.0290252
0.093943	0.0246488	0.0914582	0.0241807	0.101264	0.0221672
0	0.0220742	0	0	0.0181696	0.020201
0	0.0219347	0	0.0217875	0	0.019133
0	0	0	0	0.0098699	0
0	0	0	0	0.00888419	0
0.0678915	0.0239212	0.0503345	0.0233666	0.0866603	0.0214356
0.0532154	0	0.0886731	0.0243838	0.120324	0.0227876
0.022901	0.0226381	0	0	0.0327547	0
0.0148936	0.0235889	0.0114535	0.0222372	0.0126882	0.0198299
0	0.0221328	0.0183608	0	0.0159669	0
0.123255	0.0258578	0.128811	0.0255135	0.150664	0.0238121
0.0226337	0.0234971	0.024932	0	0.0461511	0.0205234
0.0403156	0.023313	0.0132738	0.0228127	0.0472187	0.0206187
0	0.0219162	0	0.022217	0.0285906	0.0204232
0.0132172	0	0	0	0.010575	0.0197619
0.0557279	0.0245261	0.0770484	0.0240575	0.110047	0.0219502
0	0.0220164	0.0114989	0	0.00974379	0.0191407
0.0132266	0.0207771	0	0.0216405	0	0.0196119
0.0251369	0	0.0220664	0	0.0425951	0.0207919
0	0.0238337	0	0	0.017831	0.0198579
0.0483606	0.0235098	0.0524754	0.0229796	0.0602094	0.0206032
0.0726707	0.0238244	0.0549719	0.0244044	0.0683411	0.0213872
0.0988077	0.0243822	0.093241	0.0242812	0.122242	0.0225291
0.0372088	0	0.0302085	0	0.0765786	0.0214996
0.050275	0.024044	0.0644181	0.0234376	0.076356	0.0217954
0.104825	0.0244931	0.0850502	0.0238544	0.120988	0.0224279
0.186166	0.0279383	0.310059	0.0331557	0.349283	0.032744
0.0618641	0	0.0743929	0.0234938	0.0726667	0.0213264
0.0308792	0	0.0533179	0.0221409	0.0789932	0.0209577
0.0823733	0.0249067	0.0901193	0.0243473	0.119546	0.0222016
0.0870699	0.0246719	0.0789847	0.0240575	0.0791693	0.021365
0.130504	0.0259384	0.119209	0.0250548	0.176459	0.0240202
0.0666073	0	0.0728187	0.0235191	0.102948	0.0219169
0.0151579	0.0225074	0.0241185	0	0.0218247	0
0.112788	0.0253481	0.197333	0.0280745	0.249946	0.027529
0.125654	0.0248584	0.0954898	0.0240712	0.14205	0.0231259
0.0665931	0.024734	0.0545758	0.0238407	0.0754375	0.021173
0.0946338	0.0250771	0.10973	0.0239	0.111039	0.0221412
0.102743	0.0251615	0.104929	0.0245573	0.153065	0.0235314
0.114528	0.024939	0.124725	0.0249315	0.160961	0.0236747
0.0532697	0	0.0701164	0.0242251	0.0752817	0.0211686
0.0813541	0.0244807	0.0697367	0.0240005	0.08879	0.0216378
0	0.0211853	0	0	0.0121325	0
0.0737799	0.0238198	0.0677338	0.0237449	0.0907126	0.0220031
0.0202123	0.0236433	0.0215507	0	0.051075	0.021446
0.0432842	0	0.0769907	0.0240861	0.0933731	0.0218645
0.112294	0.0248284	0.132142	0.025477	0.189411	0.0254731
0.0173332	0	0.0366527	0.0228152	0.038772	0.0201226
0.0201155	0	0	0.0217556	0.0127897	0.0195331
0.0256797	0	0.0554356	0.0237461	0.0849452	0.0215004
0	0.0212252	0	0	0.0099495	0.0194443
0.0146448	0.0214708	0	0.0221323	0.0132515	0.0192759
0.0912085	0.0241571	0.112288	0.0251027	0.167027	0.0239555
0.0454257	0	0.0730213	0.0235167	0.0886058	0.0216152
0.129493	0.0249735	0.132043	0.0247764	0.17296	0.024485
0.116287	0.0246534	0.143635	0.0251187	0.18642	0.0246244
0	0.0229266	0	0.0214022	0.00769526	0.0190628
0.0480706	0.023662	0.0600276	0.023471	0.0778201	0.0214278
0.0541761	0	0.108395	0.0249133	0.135145	0.0223273
0.0753578	0	0.0662615	0.0239	0.0963906	0.0219409
0.0793862	0.0244784	0.0505067	0	0.0941321	0.0217368
0.0558896	0.0225617	0.0709856	0.0231628	0.116793	0.0226557
0.0823006	0.0244876	0.0884159	0.0242264	0.147833	0.0234342
0.0619396	0.0238119	0.0788905	0.0239198	0.123126	0.0226561
0.110533	0.0255953	0.122849	0.0257599	0.167597	0.0243274
0.0745021	0.0242182	0.0464556	0	0.0766057	0.0214802
0.0549387	0	0.040341	0.0231107	0.0723635	0.0211203
0	0.0230239	0	0	0.0150797	0.0196956
0.0474309	0.0237012	0.0630934	0.0235628	0.101142	0.0221802
0.0515313	0.0232776	0.0604282	0.0230972	0.070239	0.0216817
0.0414836	0.023027	0.0282938	0	0.0217517	0.0199157
0.0749982	0.024403	0.0441573	0.0238339	0.0375823	0
0.0801511	0.0246972	0.0631587	0.0247444	0.0724389	0.0212922
0.132251	0.025966	0.141736	0.0252099	0.185038	0.0245112
0	0	-0.0140828	0.0224963	0.0203004	0.0202359
0	0	0	0	0.00854233	0.0190555
0	0	0	0.0218709	0.00825625	0.0201209
0	0	0	0.0221935	0	0.0195465
0.0804925	0.0242161	0.0591002	0	0.0721185	0.021306
0.0746263	0.0242461	0.112124	0.0255842	0.0935296	0.0217527
0.0284203	0	0	0	0.0226862	0.0206431
0	0.0226195	0.0159209	0.0215638	0	0.0197831
0	0	0.0133177	0	0	0
0.155348	0.0260371	0.165415	0.0264582	0.13689	0.0234703
0.0405773	0	0.0317728	0	0.035035	0.0206067
0.0375187	0	0.0211486	0.0230986	0.0243179	0.0206206
0	0.0216714	0	0.022316	0.0217714	0.0204433
0	0	0	0.0210806	0	0.0194534
0.0660688	0	0.0832339	0.0236239	0.0757779	0.0216428
0	0	0	0.0220727	0	0
0.0155301	0	0	0	0	0
0.0311638	0	0.0292482	0	0.0280314	0.0206905
0.0151946	0	0	0.0228901	0	0
0.0387141	0	0.0793771	0.0221854	0.0537563	0.0205051
0.0900477	0.0239145	0.084702	0.0252122	0.0635194	0.0214153
0.10573	0.0245412	0.13666	0.0262506	0.106791	0.0225653
0.0399341	0.0233271	0.0364777	0	0.0569562	0.0210644
0.0655825	0.0247888	0.0836439	0.0252542	0.0655411	0.0212456
0.12032	0.0251678	0.118808	0.0253309	0.103307	0.0220841
0.0622362	0.0233793	0.0824607	0.0232761	0.0932588	0.022145
0.0826665	0.0235577	0.09235	0.0243907	0.0691187	0.0212675
0.0447533	0.0227304	0.0531765	0.0224572	0.0495163	0.0205869
0.115927	0.0246719	0.140301	0.0253355	0.116642	0.0224075
0.112765	0.0247364	0.136733	0.0256755	0.0809542	0.0214274
0.168772	0.0269787	0.168962	0.026901	0.146556	0.0234441
0.184997	0.0280676	0.185716	0.0279992	0.155081	0.0235765
0.0124913	0.0220501	0.0219522	0	0.018165	0
0.0495871	0.0235189	0.0760701	0.0238424	0.0713417	0.0213268
0.157627	0.0256596	0.138403	0.0247672	0.113938	0.0221791
0.0759035	0.0240158	0.108174	0.0243131	0.0741381	0.0214921
0.120821	0.0246236	0.135796	0.0253104	0.096855	0.0216438
0.127815	0.0270589	0.148813	0.0267001	0.121831	0.0226926
0.13668	0.0256319	0.151464	0.0264788	0.137094	0.0229409
0.0668464	0.0242	0.0815626	0.0232458	0.0610696	0.0209459
0.0907085	0.0239353	0.0956637	0.0241921	0.0838278	0.0218215
0	0.0207654	0	0	0.00881435	0.0191823
0.079302	0.024573	0.089933	0.0244569	0.0786641	0.0214653
0	0	0.0196695	0.0234818	0.0354673	0.0212963
0.0403235	0	0.0823932	0.0249609	0.0718146	0.0214028
0.104514	0.0253649	0.108353	0.0246326	0.108635	0.0221185
0	0	0.0163369	0	0.0156614	0.020212
0	0	0	0.0221212	0.00989231	0.0194108
0.0315281	0	0.0434339	0	0.0509799	0.0205158
0	0.0213012	0	0	0.00759609	0.0193052
0	0	0.0113808	0.0218987	0	0
0.111302	0.0239958	0.151448	0.025283	0.136979	0.0230925
0.047508	0	0.08018	0.0239685	0.0748091	0.0213098
0.16288	0.0260832	0.169678	0.0275399	0.145341	0.0232016
0.131297	0.0254754	0.15009	0.0261707	0.141969	0.0229551
0	0.0219147	0	0.0212713	0	0.0189002
0.0464511	0.0232702	0.04866	0	0.0533372	0.0208501
0.0754078	0.0233663	0.128792	0.0257234	0.113073	0.0220861
0.0921359	0.025084	0.0914751	0.0233934	0.088075	0.0220215
0.0850711	0.0246167	0.0956032	0.0245984	0.0799276	0.021975
0.0710164	0.0228179	0.0878288	0.0240577	0.09207	0.0219864
0.11523	0.0256987	0.134395	0.0256162	0.126517	0.0226095
0.0766274	0.0240475	0.0997113	0.0236049	0.103093	0.0219275
0.151345	0.0264008	0.153671	0.0261068	0.138241	0.0230864
0.0761571	0.0239399	0.06756	0.0238453	0.066885	0.0210758
0.0699206	0	0.0618041	0.0230649	0.0508137	0.0208667
0	0.0224625	0.0107987	0.0217243	0	0.0196135
0.0508439	0.0246662	0.0743966	0.0236199	0.0686022	0.0211125
0.0516833	0.0231157	0.0693089	0.0240577	0.060553	0.0212266
0.059129	0.0233882	0.0207719	0	0.0201455	0.0201636
0.0803713	0.0243594	0.0665548	0	0.0277051	0.0206869
0.0751461	0.0245108	0.080407	0.023398	0.0670391	0.0214921
0.175112	0.0272641	0.185408	0.0275103	0.15308	0.0236199
0	0.0330812	0	0.0263232	0.00630137	0.0209627
0	0.0250941	0	0.0226412	0	0.0202442
0	0.0243364	0	0.0237816	0	0.0204913
0.0158685	0	0	0	0.0147933	0
0	0.021955	0	0.0217404	0.00865366	0
0	0.025207	0.0150268	0.0224043	0.0125912	0.020419
0	0.0469039	0	0.0260993	0.00901856	0.0205628
0	0.0260928	0	0.0213384	0	0.0194894
0	0	0	0	0.00927077	0
0.0168302	0.0221359	0.0156739	0.0217136	0.0110925	0.0195104
0	0.0230014	0.0148667	0.0231945	0.00931965	0.0197806
0	0.0302507	0	0.0246375	0.00928649	0.0210691
0	0.0260662	0	0.0226404	0.0113836	0.0207195
0	0.0230848	0	0	0	0
0	0.0321521	0.0107889	0.0246711	0	0.0210389
0	0.0312871	0	0.0268706	0.00645548	0.0232641
0	0.0229294	0	0	0.0161673	0.0203515
0	0.024463	0	0.0222192	0.00697711	0.0200407
0	0.0282016	0	0.0235443	0	0.0201837
0	0.0218417	0	0.0223407	0.0109116	0.0202081
0.0153355	0	0	0	0.0108452	0.0201277
0	0.0224954	0	0.0225637	0.0134957	0
0	0.0219595	0	0.0218569	0.0074818	0
0	0.0223012	0	0	0.0114908	0.0201414
0	0.0223747	0	0	0.0238012	0.0200002
0	0.0219233	0	0	0.0116228	0
0.0137898	0.0219715	0	0.0218896	0.0159798	0.0197282
0	0.0224368	0	0	0.015779	0.0200862
0.0148415	0	0	0	0.00887904	0
0	0	0	0	0.0196062	0.0202265
0	0.021982	0	0.0215848	0.014552	0.0200792
0	0.0248474	0	0.0226363	0	0
0	0.0221449	0	0.0221808	0.0155831	0.0200211
0	0.0221644	0	0	0.00770469	0.0198855
0	0	0	0.0218214	0	0.0203397
0	0.0216933	0	0	0.0136718	0
0	0	0.0111438	0	0.0192666	0
0	0	0.0114822	0.0220443	0.0208583	0.0199345
0	0.0223317	0	0.0218547	0.0165592	0.0202471
0	0.022319	0	0	0.0110659	0
0	0.0280777	0	0.0245673	0	0.0199576
0.0117053	0.0223422	0	0.0225146	0	0.0201183
0	0.0222835	0	0	0.0113016	0.0200325
0.0200842	0.0216452	0	0.0218722	0.0107029	0.020066
0.0163144	0	0	0	0.0185477	0
0	0.0243985	0	0.0223559	0.00961888	0.0196534
0	0.0314965	0	0.0283175	0.0122744	0.0215927
0	0.0214421	0	0	0.00882188	0.0198107
0	0.0295099	0	0.0213794	0	0.0191731
0	0.0334292	0	0.0260985	0	0.0203536
0.0146855	0	0	0	0.0110339	0
0.021402	0.0223697	0	0.021618	0	0.0204126
0	0.0219207	0	0	0.0217813	0
0	0	0	0.021747	0.0164791	0.0201281
0	0.0405003	0.0134091	0.0282393	0	0.0203984
0	0.0233809	0.0225262	0.0219033	0.00917238	0.0202247
0	0.021336	0	0	0.0185033	0
0	0	0	0	0.0113468	0.020053
0	0	0	0.0220586	0	0
0.0168824	0.0234384	0	0	0.00835539	0
0	0	0	0	0.0197409	0.0201791
0.0223117	0.0214639	0	0	0.00957618	0.020436
0	0	0.0117913	0	0.0201611	0
0	0.0218768	0	0.0221143	0	0
0	0	0.0137707	0.0225579	0.00955865	0.0201751
0	0.0300787	0	0.0237252	0	0.0214429
0	0.0225723	0	0	0.0156158	0.0200743
0.0125438	0.0233839	0	0	0.0107068	0
0	0.0228159	0	0.0217174	0	0.0198516
0	0.0216855	0	0	0	0.0199261
0	0	0	0.0222337	0.00995769	0
0	0.0218331	0	0	0.0200676	0
0	0.0297383	0	0.0263024	0.00659958	0.0206806
0	0.0270849	0	0.0256095	0	0.0236496
0	0.0219283	0	0	0	0.0191927
0.0114208	0	0	0.0217239	0	0.019284
0	0.0269104	0.0140105	0.0253169	0.0134448	0.020666
0	0.0608567	0.011607	0.0315449	0.0116729	0.0258502
0	0.0276328	0	0.0250304	0.0184183	0.0211681
0	0	0.0161614	0	0	0.0191313
0	0.0217879	0	0.0226519	0	0.0197418
0	0.0228337	0	0.0230156	0.0119148	0.0196886
0	0.0330674	0	0.0281867	0.0179672	0.0212335
0	0.0271651	0	0.0277228	0	0.0221371
0	0.0226381	0	0.022036	0.0101602	0.0195323
0	0.0368573	0.0112035	0.034643	0.0133499	0.0277754
0	0.0358569	0	0.0331032	0.0152539	0.0330723
0	0.0222935	0.0122364	0.0219599	0.0102254	0.019809
0	0.0248054	0.0144532	0.0248176	0.0149579	0.0207677
0	0.0300485	0	0.026492	0.00679834	0.0211586
0	0.0225495	0	0.0213515	0	0.0193676
0.0167819	0	0	0.0212071	0.00787943	0.0195544
0	0.0242109	0	0.0237781	0	0.0196695
0	0.0225014	0.0125768	0.0225001	0.0084682	0.0192111
0.0116359	0	0	0	0	0.019107
0	0.0235805	0	0.0217612	0.0106875	0.0193169
0.0154979	0.0219745	0	0	0	0.0192946
0.0138031	0.0228522	0	0.0223654	0.00958792	0.0196473
0	0	0	0.0212984	0.00960445	0.0193728
0	0	0	0.0210782	0	0
0.0137203	0	0	0	0.00757955	0.0191506
0	0.021899	0	0.0217786	0	0
0.0117299	0.0274025	0	0.0242405	0	0.0198462
0.0136615	0.0229718	0	0.02218	0.00770706	0.0193209
0	0	0	0	0.00749707	0.0195246
0	0.0218641	0	0	0.00645238	0.0194742
0	0	0.0114547	0	0	0
0	0.0216168	0	0	0.013922	0
0.0322251	0.0220565	0	0.0210461	0.00733691	0
0	0.0218571	0	0	0	0
0	0.0215188	0	0.0218864	0.00766177	0.0194344
0	0.0319955	0	0.0270711	0	0.0208678
0	0	0	0	0.0139164	0.0191497
0	0.0227079	0	0.0223922	0.00895351	0.0193307
0	0	0	0.0224293	0.00627175	0
0.0118167	0	0	0.0218324	0	0.019488
0.0129577	0.0248342	0	0.0239543	0.00817919	0.0203617
0	0.0382784	0	0.0364288	0	0.026794
0	0.0230181	0.0145948	0.0224119	0	0.0187833
0	0.0331272	0	0.0264363	0	0.0224329
0	0.0380913	-0.0110226	0.0312822	0	0.0230893
0	0.0215381	0	0.0214081	0.00914346	0
0	0.0224846	0	0	0.00902192	0.0192973
0.0129045	0	0	0.0218001	0.017986	0
0	0	0.0171777	0.0221599	0	0
0.0165254	0.0506358	0	0.036912	0	0.0266345
0	0.024646	0	0.0209523	0.0125677	0.0201542
0	0.0222233	0	0.0213315	0	0.0190565
0	0.0221005	0	0.0215368	0.00636667	0
0.0141672	0	0	0.0213686	0.00848561	0.0193439
0	0.0239533	0	0.0227971	0	0.0196117
0	0.0218901	0	0	0	0.0191393
0	0.0222071	0	0	0.00724517	0.0193001
0	0.0217989	0	0.0216081	0.00965002	0
0.0119596	0.022176	0	0	0.00818045	0
0	0.022203	0	0.0218943	0.0102797	0.0193786
0.0120904	0.0329956	0	0.0264643	0	0.0251037
0	0.0221067	0	0.0213917	0.00893642	0.0191562
0	0.0246894	0	0.0219348	0	0.0194894
0	0.0233019	0	0.0232097	0	0.0221595
0	0.0215616	0.0137432	0	0	0.0189006
0	0.0223855	0	0	0	0
0	0	0	0	0.0109112	0
0	0.0230937	0	0.0226864	0.0087772	0.0203365
0.0209293	0.021131	0	0	0.0120352	0.0201931
0.0195205	0	-0.0125872	0.0215777	0.0107532	0
0	0.0240031	0	0.0229475	0.0086083	0.0202729
0	0.0397171	0	0.0243378	0.0121922	0.0201427
0	0.0241331	0	0.022981	0	0.0199266
0.012825	0.0216025	0	0	0.0167958	0.0200386
0	0.0204992	0	0.0219469	0.0133601	0.0195567
0	0.0215154	0	0.0221766	0.00982388	0.0199817
0	0.0294061	0	0.0235726	0	0.0206596
0	0.0252777	0	0.0228168	0	0.0200342
0.0187011	0.021226	0	0.0212591	0.00872321	0
0	0.0302387	0	0.025017	0	0.021202
0	0.0270366	0	0.0256583	-0.00662976	0.0218893
0	0.0209154	0	0	0.0131207	0
0	0.0230311	0.0126264	0.0229227	0.0104656	0.0200363
0	0.0249502	0	0.0234062	0.00784537	0.0197008
0	0	0	0	0.0115642	0
0.0153002	0	0	0	0	0
0	0.0218415	0	0.0225787	0.00966452	0.0200991
0	0.0220748	0	0.0218369	0.007743	0
0.0136904	0	0	0	0.0207966	0.0201519
0	0.0211008	0	0	0.0108697	0.0199984
0	0	0	0	0.00683371	0
0	0.0210207	0	0.0217265	0.00718742	0.0197891
0	0	0	0.0217519	0.0106695	0
0.0136906	0	-0.0136654	0.0219012	0	0
0.0150207	0	0	0	0.014691	0
0	0	0	0	0.00911303	0
0	0.0232784	0	0.0212592	0	0.0202141
0	0.0221459	0	0	0.0122257	0.0198842
0.0162139	0	0	0.0223858	0.0131342	0
0	0	0	0.0215986	0.0101593	0.0200806
0.0194933	0	0	0	0.0129399	0
0	0	0	0	0.017295	0
0.0134971	0.0213766	0	0.0215915	0.0174423	0
0	0.0214558	0	0.0225209	0.0138079	0
0.0145209	0.021633	0	0	0	0
0	0.0267177	0	0.0227642	0	0.0195469
0.012617	0.0212815	0	0.0219939	0.0155319	0.0203254
0	0.0206973	0	0	0.0124059	0
0	0	0	0	0.015669	0.0199871
0	0	0	0.0215366	0.0165993	0.0199689
0	0.0228988	0	0.0220595	0	0.0194753
0	0.0297834	0	0.0269626	0	0.0208875
0	0.0214454	0	0.0221065	0.00876221	0
0	0.0270747	-0.013256	0.0230097	0	0.019419
0.0139835	0.0296013	0.0136991	0.0242639	0	0.0199309
0	0	0	0	0.0187786	0
0	0	0	0.0222944	0.0116732	0
0	0	0	0.021997	0.0194595	0
0.012343	0	0	0	0.0188402	0
0	0.0358791	0	0.0268409	0.00789628	0.020367
0	0.022458	0	0.0220349	0.0184756	0.0198845
0.017454	0.0213945	0	0	0.0143713	0
0.0129778	0.0219106	0	0	0	0
0.0116509	0.0210845	0	0.0220857	0	0
0	0.0218092	0	0.0217869	0.00861838	0
0	0.0216473	0	0	0.00926373	0
0	0	0	0.0216362	0.0171893	0.0199253
0.013884	0	0	0	0.0197274	0
0	0.0212876	0	0	0	0.0201687
0	0.0214896	0	0	0.0103499	0.0200035
0	0.0261816	0	0.0225257	0.00646332	0.0206655
0	0.021593	0	0	0.0141391	0.020152
0	0.0214724	0	0	0	0
0	0.0224199	0.015462	0.0224396	0.00920791	0.0197799
0	0	0.0129746	0.0216253	0	0
0.0164709	0.0212287	0	0.0216549	0.0105026	0
0.0142097	0	0	0	0.0198837	0
0.0169762	0	0	0	0.00683977	0.0197435
0	0	0	0.0220287	0	0
0.0113413	0.023547	0	0.022614	0	0.0199685
0.0115628	0.0318543	0	0.0243211	0	0.0225318
0	0.0234955	0	0.0226	0	0.0204444
0	0	0	0.0220427	0	0
0	0	0	0.0215789	0	0.0194076
0	0	0	0.0222631	0	0.0199124
0	0.0266278	0	0.0237449	0.0074275	0.0203911
-0.0126041	0.0233395	0	0.0236613	0	0.0216637
0	0.0229303	0	0.022139	0	0
0	0.0262532	0	0.0250217	0	0.0245606
0	0.024583	0	0.025371	0	0.0275357
0	0	0.0109841	0	0.00781514	0.0194997
0	0.0224024	0	0.0220096	0	0.0205185
0	0.025035	0	0.022634	0.00823181	0.0208208
0.0123908	0	0	0.0221294	0	0.0196564
0	0	0	0	0	0
0	0.0221961	0	0.0225872	0	0.0198999
0	0	0.0126846	0	0.00885516	0.0194881
0.015815	0	0.0127487	0	0.00698488	0
0	0.0226824	0	0	0	0.0197392
0	0	0	0	0	0
0	0.0210695	0.0131091	0.0220786	0	0.0196356
0.0137408	0	0	0	0	0
0	0	0	0	0	0.0197001
0	0	0	0	0	0.019591
0	0.0229592	0	0.021824	0.00636208	0
0	0.0235526	0	0.021984	0.00668267	0.0197028
0.0121217	0	0	0	0.00753109	0.0201081
0	0	0	0.022422	0	0.0196189
0	0.0224967	0.0140373	0	0	0
0	0	0	0	0	0
0.0153525	0	0	0	0.00950759	0.0196144
0.0163822	0	0	0	0.0101547	0.0198443
0	0	0	0.0220019	0.00792628	0.0196597
0	0.0224124	0	0	0.00709115	0
0	0.0248075	0	0.0232012	0	0.0202229
0	0	0	0	0	0.0195193
0	0.0224802	0	0	0	0
0.0232972	0.0216877	0.0132982	0.0219721	0.00979349	0.0195935
0	0.0231382	0	0.0220136	0	0.0196166
0	0.0225037	0	0.0219116	0	0.019569
0	0.0261792	0	0.027278	0	0.0239705
0	0.0218343	0	0	0	0.0195859
0	0.0237647	0.017025	0.0216234	0.0100508	0.0201647
0	0.0242018	0	0.0243268	0	0.0219913
0.0123843	0	0	0	0	0
0	0	0	0	0	0.0195319
0.0181494	0	0	0	0	0
0	0	0	0	0.0105536	0
0	0.0287874	0	0.0264882	0.0117207	0.0235125
0.01349	0.0220414	0	0.0216137	0.00754028	0.0201555
0	0	0	0	0	0
0	0	0	0.0225686	0.00715184	0
0	0	0	0	0.00865752	0
0	0.0220102	0	0	0	0.0196785
0	0	0	0	0	0
0.0136887	0	0	0	0.00767564	0
0	0	0	0	0.00785362	0.0196266
0.0139082	0	0	0	0	0.0196059
0	0	0	0.0218889	0.00966857	0.0197369
0	0.0247925	0	0.0247216	0	0.0228125
0	0	0	0	0.00712487	0.0197689
0	0.0224137	0	0.0219912	0.0107967	0.0198331
0.0117057	0	0.0124264	0.0210082	0	0.0208735
0.0151392	0	0	0	0	0.0198852
0	0	0.0108609	0	0	0.0195812
0	0	0	0	0	0
0.0573925	0.0244509	0.0514964	0	0.0748982	0.0214111
0.0211296	0	0	0	0.0300464	0.0205188
0	0.0224108	0	0	0.0129772	0.0198823
0.0136592	0.0223093	0	0	0.00691544	0
0.12785	0.025404	0.0927968	0.0239782	0.103844	0.0217405
0.0388433	0.023379	0.0364262	0	0.038438	0
0.0408143	0.0238429	0.0212346	0	0.041003	0.0205756
-0.0121568	0	0	0.0221678	0.0305297	0.0205304
0	0	0	0	0	0
0.0635408	0.0242884	0.0517691	0	0.0644986	0.0209795
0	0.0222331	0	0	0	0.0192188
0	0	0	0.0213731	0	0.0193031
0.0434036	0	0.0263843	0.0231184	0.0603376	0.0214335
0.0135977	0	0	0	0.0198006	0.0201077
0.0478671	0	0.0390675	0	0.0474283	0.0205945
0.0998013	0.0247571	0.0526091	0	0.0529939	0.0211645
0.108108	0.0249557	0.083657	0.024373	0.0845729	0.0215407
0.0426647	0	0.0304258	0	0.0595999	0.0214305
0.0769186	0.0245998	0.0524979	0.0233126	0.0609226	0.0209301
0.100682	0.0247465	0.0690985	0.0237682	0.0888055	0.0222418
0.053095	0.0233469	0.0517486	0.0233405	0.087357	0.0216943
0.0806297	0.0236015	0.0721406	0.0237066	0.0627796	0.0211965
0.034569	0	0.0311991	0	0.0507515	0.0201364
0.0978728	0.0248699	0.0864752	0.0239394	0.0901289	0.0219143
0.0949502	0.0248239	0.0917037	0.0236039	0.0714413	0.0214839
0.14039	0.0247111	0.0964481	0.0243114	0.11991	0.0224964
0.0690071	0.0242599	0.0529056	0.0233598	0.0768553	0.021304
0.0147877	0.0224512	0.0139719	0	0.0190099	0.0202979
0.0402139	0	0.0471193	0.0238452	0.0749681	0.0213165
0.130357	0.0258529	0.086574	0.0233506	0.0983539	0.0218291
0.0914459	0.0247502	0.0662858	0.0233597	0.0659386	0.0213343
0.100146	0.0242461	0.0856303	0.0242315	0.07457	0.0215993
0.111587	0.0256842	0.078457	0.0237203	0.117943	0.0221935
0.122224	0.0254247	0.0772078	0.0237659	0.120786	0.0228339
0.0904088	0.0244578	0.0594427	0	0.0846079	0.0213745
0.0862246	0.0255375	0.0613436	0.0232228	0.0690877	0.0214131
0	0.0203291	0	0	0.00810891	0.0192085
0.0802385	0.024177	0.0523759	0.0234442	0.0657228	0.02135
0.0127054	0	0.0147195	0	0.0450462	0.0215205
0.0444023	0.0242283	0.0512445	0.0230475	0.0662843	0.0208946
0.102315	0.0238455	0.0654477	0.0237272	0.0934357	0.0214293
0.0139249	0.0229817	0	0	0.0159651	0.020043
0.0191124	0.0226213	0	0.0217764	0.00914715	0.0195483
0.0310931	0	0.0223316	0	0.0430422	0.0205867
0	0.0211785	0	0	0	0
0	0.0211728	0	0.0222767	0	0
0.105882	0.0249925	0.0836616	0.0230334	0.115049	0.0222963
0.0565741	0	0.0469581	0.0231498	0.0663646	0.02115
0.137879	0.0260901	0.0968487	0.0237659	0.122856	0.0226197
0.121496	0.0249919	0.0976445	0.0240626	0.114757	0.0222842
0	0.0227192	0	0	0	0.0190803
0.0435042	0.0231728	0.036677	0	0.0669018	0.0209269
0.0602522	0.0230036	0.0634048	0.0231954	0.0877007	0.0213105
0.106456	0.0246673	0.0819467	0.0238572	0.124734	0.0232584
0.0880463	0.0240826	0.0532653	0.023257	0.0722826	0.0215991
0.0646809	0.0227395	0.0410712	0	0.0780265	0.02158
0.107339	0.0248446	0.0889161	0.0233574	0.103666	0.0217244
0.068933	0.0240152	0.051392	0	0.0864609	0.0212982
0.12581	0.0259703	0.0921451	0.0239622	0.116351	0.0222074
0.068797	0.0243589	0.054841	0	0.0568892	0.0208957
0.0600268	0	0.029706	0	0.0510117	0.0208685
0	0	0	0	0	0
0.0321953	0	0.0504311	0.0230225	0.0712125	0.0217412
0.0715122	0.0233245	0.0473557	0	0.0603757	0.0210262
0.0451766	0.0228987	0.0165451	0	0.0188298	0.0198935
0.0685348	0	0.0375157	0	0.0273572	0.0206846
0.075652	0.0239284	0.0600139	0	0.0607258	0.0212838
0.140707	0.0262029	0.110334	0.0242178	0.116527	0.0224964
0.0187027	0	0.0247959	0.0225045	0.0247923	0
0	0.0225494	0.0440553	0.0219409	0.016132	0.0196365
0.014744	0	0.0172415	0.0225911	0.0123872	0
0.118088	0.0249091	0.159658	0.0272889	0.14095	0.0234784
0.0300283	0	0.0356974	0	0.0443595	0.0204498
0.0366134	0.0233553	0.0248374	0	0.0424138	0.0208583
0	0	0.010968	0.0224062	0.0257061	0
0	0.0218179	0	0	0.010675	0
0.0540735	0.0246926	0.102326	0.0248836	0.0871602	0.0213234
0.0142988	0.0214169	0.0137913	0.0216963	0	0.0192512
0	0	0.0110722	0	0	0.0193488
0.027421	0	0.0142435	0	0.0426783	0.0206095
0.0197674	0	0	0.0228083	0.0127134	0
0.0347827	0.0230918	0.0603414	0.0231911	0.0607469	0.0208355
0.0503384	0.0239629	0.0463882	0.0236855	0.0625175	0.0210132
0.0826405	0.0245228	0.110774	0.0245048	0.109591	0.0221672
0.0451546	0.0238664	0.0474905	0.0234468	0.0660078	0.0215499
0.0411519	0	0.0650056	0.0242729	0.0712849	0.0213062
0.0882799	0.0236644	0.121315	0.0249977	0.130498	0.0233289
0.0471113	0.023377	0.0945483	0.0239402	0.12535	0.0227168
0.0642184	0.0242161	0.0704339	0.0243314	0.0719036	0.0212635
0.0420764	0	0.0847166	0.0246481	0.0796972	0.0206054
0.0836469	0.0242046	0.118141	0.0253149	0.120772	0.0226762
0.0696574	0.023735	0.0823302	0.0242652	0.0831605	0.0214092
0.120913	0.024543	0.130543	0.0248357	0.159494	0.0235754
0.0596155	0.0243358	0.0735627	0.0240143	0.101895	0.0219511
0.0127499	0	0.0311371	0.0221483	0.0257951	0
0.0359291	0	0.0793262	0.0250659	0.0998892	0.0221347
0.107271	0.0246328	0.13087	0.0252784	0.131169	0.0221932
0.0558445	0	0.0641314	0.0249726	0.0794791	0.0217265
0.0857448	0.0242829	0.111394	0.0250479	0.104827	0.0220702
0.102527	0.0242634	0.123398	0.0255888	0.145622	0.0232847
0.0896656	0.0242138	0.130645	0.0256915	0.156214	0.0236381
0.0487339	0.0240596	0.0674978	0.0242342	0.0705672	0.0212776
0.0702781	0.024032	0.0850529	0.0247444	0.0902256	0.0214072
0	0	0	0.0213687	0	0
0.0588636	0.0236705	0.0888614	0.0239388	0.0811299	0.0214027
0	0	0.0378126	0.0231805	0.0325764	0.0208841
0.0577704	0	0.121738	0.025493	0.100602	0.0221961
0.0826454	0.0248377	0.141446	0.0266522	0.139426	0.0231107
0.0159449	0.0229094	0.0388501	0.0225612	0.018146	0
0	0.0223434	0	0.0223989	0.0169206	0.0194341
0.0242074	0	0.0507055	0.0229892	0.0674336	0.0208046
0	0.021487	0	0	0	0.0195438
0	0.0210938	0.0121403	0.0222105	0.00794306	0
0.0881159	0.0236867	0.153016	0.0269329	0.158107	0.023925
0.0569625	0	0.0967322	0.0250046	0.093152	0.02229
0.119354	0.024962	0.156551	0.025194	0.15981	0.02363
0.1131	0.0247525	0.148095	0.0267686	0.165968	0.0237169
0	0.0218443	0	0.0212158	0	0.0190489
0.0368529	0	0.0599543	0.0243313	0.0754787	0.0210689
0.0466537	0	0.142896	0.0262985	0.141865	0.0226712
0.0615456	0.0241701	0.0825671	0.0234026	0.092735	0.0220963
0.0641058	0.023712	0.0536323	0.0234322	0.089557	0.0221488
0.0445753	0.0230266	0.0749229	0.0246092	0.100772	0.0218328
0.0748212	0	0.111098	0.025696	0.142094	0.023341
0.0522855	0	0.110113	0.0247894	0.125033	0.0223827
0.103735	0.0241517	0.163081	0.026319	0.176527	0.0239654
0.04333	0	0.0479992	0.0237084	0.0729886	0.0213122
0.0479013	0.0235685	0.0522197	0.0237174	0.0716629	0.0211606
0	0	0.0108464	0	0	0
0.0340671	0.0236946	0.0757207	0.0237774	0.0969495	0.0216442
0.0551048	0.0232223	0.0644075	0.0238999	0.0659685	0.0217624
0.0363986	0	0.0159984	0.0219573	0.024911	0.019784
0.0664918	0	0.0512976	0.0233158	0.0336703	0.0205714
0.0431331	0.0239813	0.0656205	0.0235349	0.0678452	0.0208071
0.117332	0.0248791	0.170234	0.027079	0.17203	0.023733
0	0.0315771	0	0.0238231	0.0180313	0.0206652
0	0.0238409	0	0.0225216	0.00639405	0.0198065
0.0388711	0.0225028	0.018896	0.0222561	0.0355849	0.0203233
0.0148364	0	0.0165095	0.0218385	0.031591	0.0203145
0.0159543	0.0224668	0.0128507	0.0220815	0.0261594	0.0204365
0	0.0251761	0	0.0230753	0.0151883	0.0205482
0	0.023152	0	0.0230323	0.0100993	0.0202987
0	0	0	0	0.018181	0.0204548
0	0.0250506	0	0.0229381	0.00830633	0.0208256
0.0161172	0.0239216	0	0.0235576	0.00954064	0.0220156
0	0.0227197	0	0	0.0232699	0.020609
0	0.0225728	0.0155301	0.0232267	0.00828988	0.0200392
0.0192897	0.0249655	0.0123373	0.0225529	0.0183864	0.0200111
0.016705	0	0	0.0231048	0.0169756	0
0.0153892	0.0228982	0.0131305	0	0.0207834	0.0204115
0.0147822	0.0220733	0	0.0227778	0.0254894	0.0205376
0.0305189	0	0	0.0222443	0.0161745	0.0202826
0.0380264	0.0228393	0.0195886	0	0.031691	0.0203341
0.0178498	0.0226117	0.0144211	0	0.0338651	0.0206941
0.0218776	0.0224571	0.0164283	0.022347	0.0228491	0
0.0143646	0.0221835	0	0.0220324	0.0218947	0.0201969
0.0272028	0	0.016419	0	0.0144406	0
0.0259364	0.0230371	0.0184918	0	0.0233528	0.0203686
0.0382445	0.0226201	0.0197299	0	0.0403818	0
0.024675	0	0	0	0.0244165	0
0	0.0239045	0	0.0222479	0	0.0202116
0.0186979	0.02295	0.0136545	0	0.0282366	0
0.042218	0.0227412	0.0238467	0	0.0291982	0
0.0162147	0	0.0292181	0.0219461	0.0202091	0
0.0294764	0.0234192	0.0138537	0	0.0247141	0
0.0388624	0.0224561	0.0196785	0.0220723	0.0355657	0.0203892
0.0418206	0.0224722	0.0229962	0	0.0437513	0.0211473
0.0196238	0.0227977	0	0	0.0209321	0.0201734
0.0355549	0	0	0	0.0284956	0.0203151
0	0.0247094	0	0.0226055	0.00868151	0.0197728
0.0304973	0	0	0	0.0185645	0
0	0	0	0	0.0224556	0
0.0260259	0.0219933	0	0.022314	0.0259539	0.0205439
0.0178941	0	0.0109305	0.0225938	0.0312868	0.0204703
0.0170588	0.0224763	0	0.0229895	0.00850533	0.0198523
0.0154543	0.0271983	0	0.0255709	0.0120295	0.0209887
0.0127958	0.0221106	0.0159449	0.0217004	0.0235405	0.0198117
0	0.0250345	0	0.0220052	0.012251	0.0198792
0	0.0258214	0	0.0232021	0.0100914	0.0198775
0.0432963	0.022336	0.024292	0	0.0410467	0.0205618
0.0131325	0.022424	0.02051	0.0219791	0.0250371	0.0204738
0.0386726	0.0222244	0.0198478	0	0.0433982	0.020757
0.0332985	0.0227617	0.013978	0.0226735	0.0428642	0.0203247
0	0.030123	0	0.0248849	0.00768743	0.0201221
0.021055	0.022637	0	0.0219028	0.0323382	0.0204841
0.0188246	0.0213879	0.0204997	0.0222143	0.0335439	0
0.0216251	0	0.0113467	0	0.0285841	0.0204825
0.0289892	0.0227122	0	0	0.0247966	0
0.0246792	0.0234365	0.0211351	0	0.0276613	0.0205993
0.0251608	0	0.0164366	0	0.0334135	0.0201893
0.0270612	0	0.0142521	0	0.0346604	0.0202779
0.0410545	0.0223156	0.0217165	0.0226442	0.0414485	0
0.0285243	0.0230863	0	0	0.0219695	0.0203119
0.0173169	0.0226366	0.0181947	0.0221799	0.0203798	0.0202678
0	0.0260404	0	0.0229424	0	0.0205015
0	0.0221989	0.0298093	0	0.0384433	0.0206981
0.0195105	0.0224727	0	0.0220685	0.0203268	0.0205627
0.0290038	0.0226443	0	0.0208452	0.0129589	0.0204158
0.0270101	0	0	0	0.0134688	0
0.0141954	0.0224981	0.0196139	0	0.0220768	0.0207041
0.0316445	0.0223148	0.0339697	0	0.0415032	0
0	0.0358717	0.0179974	0.0237326	0.007818	0.0216022
0	0.0219145	0	0	0.0151866	0.019701
0.012978	0.0222675	0	0.0219283	0	0.0199665
0	0.025191	0	0.0226835	0.0135362	0.0204609
0	0.0521291	0	0.0270516	0.00809347	0.0205389
0	0.034346	0	0.025863	0.00761319	0.0226411
0	0.0238066	0.052924	0.0222319	0.0165214	0.0199769
0	0.054513	-0.0111629	0.0276591	0.0108425	0.0287172
0	0.0561838	0.017205	0.0311036	0.00960663	0.0317786
0	0.02457	0	0.0221798	0.0151408	0.0199321
0	0.0290995	0.0196195	0.0238594	0.00912343	0.0211255
0	0.0397458	0.0147602	0.024695	0.0131435	0.021949
0	0.0226393	0	0.0223549	0	0
0	0.0229481	0.0117689	0.0216534	0.0128161	0.0197334
0.012876	0.0274393	0	0.0237479	0.0140302	0.0195677
0	0.0233098	0	0.022343	0	0.0194423
0	0.0219656	0	0	0.0101812	0.0196467
0	0.0262621	0.0132712	0.022283	0.0173903	0.0194053
0	0.0223438	0	0.0225104	0.0111484	0.0194185
0.018634	0.025395	0	0.0223716	0.011719	0.0200434
0	0.0234829	0.0134012	0	0.0104947	0
0	0.0220006	0	0.0224129	0	0
0	0	0.0170772	0.0220345	0.00929876	0.0194093
0	0.0220006	0	0	0.00938528	0.0195798
0	0.0327378	0	0.0220192	0.00663487	0.0200162
0	0.0246583	0.0337797	0.0231021	0.022636	0.0200267
0	0.0223358	0	0.0219292	0.0105502	0.0197517
0	0.0228439	0	0.0218974	0	0.0194862
0	0.0223832	0	0	0	0.0197767
0.0206704	0.0220144	0	0	0.0177877	0.0193956
0	0.0213682	0	0.0219011	0.016167	0.0194401
0	0.0229702	0	0.0217121	0.00726358	0.0195814
0	0.0224086	0.0151581	0.0222927	0.00887894	0.0195029
-0.0115719	0.0461266	0	0.0247735	0	0.0203647
0	0.0225356	0.0113365	0	0.0123465	0.019959
0	0.0241579	0	0.0216009	0.0111694	0.0196546
0	0.0232725	0.0109998	0.021872	0.00753754	0.0195646
0	0.0218719	0.0167126	0.0229141	0.0191993	0.0197189
0	0.0276942	0.0437285	0.0242047	0.0164284	0.0207917
0	0.0545502	0.0180875	0.0315367	0.00630595	0.026679
0	0.0259926	0.0148846	0.0217841	0.0177747	0.0195029
0	0.0455442	0	0.02489	0	0.021911
0	0.0580954	0	0.0295154	0	0.0243741
0	0.0223311	0.0366166	0.0218277	0.018082	0.0195692
0	0.0224843	0	0.021965	0.0156796	0.0194526
0.014984	0.0219155	0	0.0220326	0.0177123	0.0197203
0	0.0222369	0	0.0218312	0.0185406	0.0196293
0	0.0925088	0	0.0311777	0	0.0262781
0.0215515	0.0266098	0.0229033	0	0.0174796	0.0206454
0	0.0236526	0	0	0.0146863	0.0196056
0	0.0229741	0	0	0.00684261	0.0196652
0	0	0	0.021881	0	0.0197923
0	0.0272025	0.0157797	0.0226358	0.00863245	0.0194358
0	0.0220308	0	0.0218693	0.0103381	0.0194708
0.0123586	0.0216732	0	0.0218507	0.0199698	0.0197712
0.0124764	0.0221063	0	0	0.0134944	0
0	0.0220886	0	0	0.00953176	0
0.0158915	0.0227553	0	0.0224266	0.0161481	0.0197551
0.0130867	0.0432416	0	0.0255471	0.00965063	0.0244746
0.0113789	0.0238543	0	0.0222478	0.0175388	0.0198991
0	0.0280659	0	0.0221237	0	0.0196771
0	0.0246083	0	0.0227056	0.00921203	0.0227304
0	0.0213213	0	0	0.0101643	0.0198059
0	0.0235872	0	0.0216888	0	0.0194026
0	0.0215355	0.0149473	0	0.0178827	0.0196295
0	0	0.0129564	0	0.0106738	0
0.0149612	0.0221847	0	0.022061	0.00752211	0.0193089
0.0152326	0.0223718	0	0.0221116	0.0100018	0.0194295
0	0.0276367	0	0.0234134	0.00920314	0.0195495
0	0.0231256	0	0.022388	0.00658621	0.0199103
0.0197842	0	0.0170365	0	0.0110488	0
0	0.0277513	0	0.0227972	0.0117927	0.022297
0	0.0259348	0.011994	0.0232467	0.0103897	0.0238911
0	0.0224519	0	0	0.012353	0.0199149
0	0.0230493	0	0.0227156	0.00860502	0.0202016
0.0123906	0.0263951	0	0.0233582	0.0102477	0.0203589
0.0123363	0	0	0.0228028	0	0
0	0	0	0.0222778	0.0074799	0.0197803
0	0.0226616	0	0	0.01482	0.0197112
0	0.0224038	0	0	0.0164731	0.0198916
0	0	0	0	0.0107103	0
0	0.0224323	0.0209564	0	0.0111469	0
0.0128009	0	0	0	0	0
0	0.0215136	0.0200807	0.0223044	0.00991734	0.0201343
0.0143412	0	0	0	0.010383	0
0	0	0	0	0	0
0.0163854	0	0	0	0.0155087	0
0	0.0227272	0	0	0.0102508	0
0	0.0229547	0	0.0220093	0.011613	0.0197112
0.0144618	0.0222273	0.0171555	0.0222176	0.0127575	0
0	0	0	0	0.0142195	0.0196949
0.0118341	0.0231381	0	0	0	0
0	0	0	0	0.00693442	0
0	0	0.0244934	0	0.020497	0
0.013828	0	0.0189213	0	0.014118	0
0	0	0	0	0.015711	0
0	0.0229079	0	0	0.00735708	0
0	0.0252398	0	0.0217366	0	0.019436
0	0	0	0	0.00835548	0
0	0.0221494	0	0	0.016035	0
0	0	0.0152502	0.0231298	0.0119029	0.0197552
0.0128087	0	0.0115084	0.02266	0.0110873	0
0.0117848	0.0232348	0	0.0219603	0.00975058	0.019206
0	0.0277583	0.0146103	0.0243055	0.00619185	0.0219225
0	0.0210895	0.0209841	0	0.00718288	0
0	0.0246462	0.011166	0.0222341	0.00853503	0.0197525
0	0.026635	0	0.0233724	0	0.0205711
0.0115841	0	0.019398	0	0.0222469	0.0196845
0	0	0.0284712	0.0229731	0.00751218	0
0.0175243	0	0	0	0.0193792	0.0197486
0	0.0223982	0.0153394	0	0.0144952	0.0200056
0	0.0317135	0	0.0246736	0	0.0214762
0.0252286	0.0230915	0.0134737	0	0.0128398	0.0203348
0.0116086	0.0226215	0.0190843	0.0224102	0	0
0	0	0	0	0.0113619	0
0	0	0	0	0.00821702	0.0197968
0	0.0214651	0	0	0	0.0198114
0	0	0	0	0.00937911	0
0	0	0.0232803	0	0.011378	0
0	0.022235	0	0	0.0133525	0
0	0	0	0.022403	0	0.020089
0.0131898	0.0220935	0	0	0.0171538	0
0	0.0244187	0	0.0228828	0	0.0210024
0	0.0228397	0.0170506	0	0.0128302	0
0	0.0228557	0	0.0222278	0.0110127	0.0199276
0.0124899	0.0221767	0.0142056	0.0214642	0.0064712	0.0202369
0	0	0	0	0.01108	0.0195722
0	0	0	0.0224035	0.00857238	0.0196313
0.0142624	0	0.0193719	0	0.0197841	0.0199209
0.0648432	0	0.0497033	0	0.0522448	0.0205619
0.0666653	0	0.0337271	0	0.0485173	0.0206856
0	0	0	0	0.0264941	0
0	0	0	0	0.00632247	0.0197146
0.0881285	0.023457	0.108178	0.0257736	0.108473	0.0218833
0	0.0214769	0.0155258	0.0208951	0	0
0.012403	0	0	0.0216386	0	0.0194982
0.0552984	0	0.046782	0	0.0543656	0.021057
0.017497	0	0	0.0229715	0.0125565	0
0.0665439	0.0231362	0.0697481	0.0230064	0.0694363	0.0205969
0.15091	0.0270477	0.10227	0.0247969	0.0865062	0.0218801
0.22841	0.0295931	0.241378	0.031351	0.195777	0.0253559
0.0703629	0.023827	0.0692908	0.0234124	0.0909246	0.0217522
0.104741	0.0247957	0.0951002	0.0240127	0.0946065	0.0219952
0.221986	0.0295374	0.189954	0.028738	0.189238	0.0265418
0.0925623	0.0236087	0.138616	0.0256975	0.16771	0.024295
0.141225	0.0267807	0.104162	0.0249224	0.0958372	0.0216054
0.0609129	0.0223742	0.0810859	0.0233526	0.0939625	0.0208551
0.200891	0.026981	0.199317	0.0288088	0.189978	0.0255638
0.184068	0.0272711	0.145433	0.0259379	0.115481	0.0222296
0.337882	0.0367305	0.295826	0.0363852	0.289789	0.0322664
0.125981	0.0252636	0.150706	0.0260091	0.143795	0.0238029
0.0248446	0.0220435	0.0308673	0.0230022	0.0219353	0.0202421
0.0863527	0.0233056	0.109682	0.0243286	0.117231	0.0224344
0.273432	0.0316589	0.224874	0.029838	0.212841	0.0261092
0.15885	0.0263755	0.138351	0.0270059	0.127615	0.0226398
0.222654	0.0282748	0.206712	0.0294112	0.172701	0.0245759
0.239891	0.0304254	0.234253	0.0324509	0.214975	0.0271119
0.265161	0.0318293	0.23766	0.0315335	0.244028	0.0290596
0.110334	0.025526	0.107188	0.024766	0.0928547	0.0219411
0.136366	0.0249942	0.121283	0.0254678	0.122389	0.0225388
0	0	0	0	0.00917414	0
0.153649	0.0266472	0.113421	0.0241944	0.121174	0.0220716
0.0159054	0	0.0181336	0	0.0529218	0.0212195
0.0732786	0.0244181	0.113227	0.0258516	0.106124	0.0222245
0.184383	0.0279755	0.163945	0.0271702	0.187034	0.0263458
0.0149398	0	0.0125801	0.0225801	0.0189497	0
0.0199953	0	0	0.0222184	0.0111923	0.0195419
0.0437993	0.0229014	0.0604454	0.0229663	0.0801845	0.0209999
0	0.0212971	0	0	0.00721583	0
0	0	0	0	0.0123442	0
0.218001	0.0289168	0.243126	0.0321292	0.255611	0.0296617
0.0764032	0.0237658	0.0899758	0.0244888	0.112449	0.0221829
0.332306	0.0366039	0.308969	0.0380739	0.27411	0.0307772
0.246768	0.0304342	0.235248	0.0312095	0.233837	0.0279846
0	0.0213406	0	0	0	0
0.0699121	0.023667	0.079889	0.0240819	0.0910224	0.0215897
0.13502	0.0239027	0.193849	0.0293633	0.189403	0.0252667
0.148187	0.0254409	0.128658	0.0248791	0.145312	0.0236987
0.167088	0.0272135	0.128291	0.0257211	0.133962	0.0226924
0.129036	0.0243884	0.121563	0.0253553	0.147613	0.0239065
0.203734	0.0293706	0.189563	0.0283957	0.199279	0.0263599
0.127194	0.0249957	0.135482	0.0258759	0.157013	0.023815
0.290636	0.0349763	0.260449	0.0337859	0.257126	0.0302275
0.119208	0.025404	0.0925191	0.0247558	0.0994122	0.0221124
0.10812	0.024912	0.090712	0.0244134	0.0876296	0.0215153
0.0116409	0	0	0	0.0143554	0
0.0770278	0.0237408	0.104115	0.0243068	0.112594	0.0225257
0.0955394	0.0237541	0.0733011	0.0239251	0.0748869	0.021166
0.0939374	0.0236204	0.0240583	0	0.0281041	0.0198806
0.14651	0.0250547	0.0852865	0.0243108	0.046136	0.020847
0.148232	0.0260141	0.111587	0.0245025	0.0917629	0.0217103
0.335441	0.0374073	0.326418	0.0390005	0.285631	0.0317612
0.0332003	0.0225358	0.0226525	0	0.017261	0.0201274
0	0.0209402	0	0.0218381	0.0139999	0.0202478
0	0	0	0.020452	0.00696414	0.0195785
0.0261537	0.0234283	0.0226693	0	0.0315622	0
0	0.0216272	0.0142222	0.0222486	0.0129189	0.0200746
0.0191576	0	0	0.023332	0	0.020636
0.0217831	0.0228359	0.0143995	0	0.0303241	0.0203832
0	0	0	0.02317	0.0125817	0.019797
0.0122906	0.0221574	0.0132582	0.022398	0.0260906	0.0196773
0.0220192	0.0231801	0.032428	0	0.0321735	0.0204824
0.0486931	0.0233049	0.02922	0.0236438	0.0407107	0.0202897
0.0366464	0	0.0259456	0.0228259	0.0365906	0.0205376
0.0334143	0.023174	0.0230616	0	0.0343142	0.0205008
0.048022	0	0.0415671	0	0.0490064	0.0203251
0.0186578	0	0.0280051	0	0.0491553	0.0205356
0.0293856	0.0233349	0.0426663	0.0228499	0.0441776	0.0202499
0.0233002	0	0.0264585	0	0.0328563	0.0198761
0.0433516	0	0.0478915	0.0231778	0.0443411	0
0.0438716	0	0.0311764	0	0.0422329	0.0209632
0.0649688	0	0.0460165	0	0.0587753	0.0205008
0.0373948	0	0.0383784	0.023784	0.0343218	0.0203447
0.0121727	0.0211529	0	0.0227476	0.0157343	0.0199198
0.0263957	0	0.0199327	0	0.0447599	0.0202239
0.0673311	0	0.0399885	0	0.0430498	0.0204745
0.0402613	0	0.0353341	0	0.0302631	0.0201292
0.0479057	0.0231755	0.0370533	0.022512	0.0386216	0.020503
0.0473081	0	0.0434277	0.0227097	0.0620698	0.0209308
0.0531616	0	0.0354293	0	0.0572148	0.020623
0.0306624	0	0.0237802	0	0.0244727	0.0201756
0.0404004	0	0.031751	0.0230767	0.0350978	0.0202624
0	0.0213932	0	0.0215927	0.0101501	0.0187848
0.0358079	0	0.0327419	0.0232535	0.0379499	0
0	0	0	0	0.0322816	0
0.0149029	0	0.026039	0.0230887	0.0372672	0.0200865
0.0467618	0.0229219	0.030912	0	0.0446765	0.0203253
[truncated: 1,918 more rows]

## Sheet: Fig6
Corr	Normalized MI
0.271779	0.0349317
0.348749	0.0592182
0.204435	0
0.171626	0
0	0
0	0
0.280898	0.0585687
0.180997	0.0370848
0	0
0.16152	0.0442618
0.327021	0.0961369
0.252519	0.0356602
0.230146	0
0.18976	0
0	0
0.164691	0
0.341539	0.0524799
0	0
0	0.0569766
0	0
0	0
0	0
0.189274	0
0.334365	0.0487553
0.179649	0.0382918
0	0
0	0
0.19068	0.0417143
0	0
0.267775	0.0339383
0	0.0358489
0	0
0	0
0	0
0	0
0	0
0	0.0355395
0	0
0.243442	0
0.192774	0
0.202579	0
0	0
0.178022	0
0	0
0.171985	0
-0.32536	0.0679667
0	0
0.168759	0.0393368
0	0
0.293141	0.0590595
0	0
0.175822	0
0.248287	0.0594414
0.236341	0.0456452
0	0
0.172262	0.0422482
0	0
0.248962	0.0422307
0	0
0	0
0.23099	0
0.193325	0
0.217538	0.0358673
0.197549	0.0424659
0	0
0	0
0.229412	0.0367688
0.226475	0
0	0.0468781
0.14937	0
0	0
0.59577	0.103956
0	0
0	0
0	0
0.200714	0.0542828
0.236499	0.0556465
0.196059	0
0.21672	0.040157
0	0
0	0
0	0
0.175121	0.0430552
0.184235	0
0	0.0494338
0.152064	0
0	0
0.313773	0.0699825
0.489018	0.096417
0.80199	0.226448
0.37964	0.047699
0.217986	0
0	0
0.585809	0.134372
0.193633	0.0411511
0.194054	0
0.176991	0.0448933
0.57558	0.113374
0.209849	0
0.53599	0.103853
0.467679	0.0648641
0.254664	0
0	0
0.208858	0
0	0
0	0
0	0
0.361397	0.0664728
0	0
0.270842	0.0475248
0.4419	0.0665259
0.362036	0.0915721
0	0
0	0
0	0.0394233
0	0
0.321512	0.0395823
0	0.0395261
0	0
0	0
0.180872	0
0.686886	0.160239
0	0
0.458164	0.0626144
0.161229	0.0448693
0.315502	0.0571309
0.514944	0.0894024
0.411611	0.0808851
0	0
0.379777	0.0709504
0.280121	0.0353026
0	0
0	0.105269
0.189664	0
0.271329	0
0.366284	0.0535079
0.582958	0.134657
0	0
0.340227	0.048039
0.513321	0.0954097
0.594007	0.118993
0	0
0.24668	0.0414581
0	0
0.515855	0.0903007
0.154686	0
0.347405	0.0606927
0.44306	0.0812641
0.321458	0.0440394
0.164876	0
0.257512	0.0559805
0.150412	0
0	0
0.516335	0.107581
0.509272	0.088772
0	0.11686
0.501684	0.0854871
0.311922	0.0544564
0.473793	0.0638599
0.445153	0.0925487
0	0
0	0
0.293028	0.0492496
0.378268	0.0807462
0.4977	0.0890628
0.52705	0.139885
0	0
0.285242	0.038893
0	0
0.227	0.0599602
0.717152	0.23318
0.32119	0.0425564
0.185437	0
0	0
0.675066	0.147037
0.498113	0.0878584
0.385186	0.0795421
0	0.0430715
0	0
0.503268	0.107803
0.161308	0
0.207401	0
0.196932	0.0377613
0.45173	0.0929998
0.258587	0.0502508
0.554372	0.106555
0.352453	0.0494228
0.223132	0.0420076
0	0
0.243081	0
0.192806	0.033477
0	0
0.157064	0
0.381351	0.0946094
0.209659	0
0.400382	0.0474553
0.354494	0.0677235
0.348459	0.107262
0.170704	0
0.203733	0.0409837
0	0
0	0
0.356801	0.0405767
0.171612	0
0	0
0	0
0.161932	0
0.392738	0.0648137
0	0
0.367004	0.0844482
0	0.0440589
0.284194	0.0338187
0.441983	0.0954352
0.362266	0.049364
0	0
0.436703	0.0957391
0.205496	0
0	0
0	0.125742
0.337103	0.0647345
0.204802	0
0.316721	0.0437005
0.406379	0.0758134
0	0.0378662
0.375001	0.0775237
0.551925	0.133853
0.546911	0.0939278
0.181469	0
0.299829	0
0	0
0.47174	0.0703394
0.219873	0.0365154
0.401288	0.0536168
0.429298	0.0615004
0.338425	0.0425835
0.171831	0
0.300004	0.041695
0.213712	0
0.238927	0.039378
0.455596	0.102069
0.375348	0.053238
0	0.0916569
0.443331	0.0755843
0.240682	0
0.508712	0.0917293
0.438283	0.0760501
0	0
0	0
0.415485	0.0770078
0.436448	0.0611886
0.535907	0.100623
0.493921	0.0977739
0	0
0.295688	0.0545732
0	0
0.307893	0.043145
0.38757	0.0991873
0.307576	0.0514627
0.184824	0
0	0
0.600888	0.119611
0.387886	0.081019
0.24476	0.0415229
0	0
0.576364	0.110927
0.333117	0.0526501
0.271778	0.0485344
0.172665	0
0.559407	0.107899
0.242664	0
0.549924	0.0715606
0.441119	0.0659518
0.273893	0.047177
0	0
0.256302	0.0553491
0.153939	0.0375689
0	0
0	0
0.332925	0.0456958
0.166679	0
0.305624	0.041534
0.430256	0.0799357
0.338634	0.0795619
0	0
0	0
0	0
0	0
0.321275	0.0366505
0	0
0	0
0	0
0.20105	0
0.637212	0.111919
0	0
0.484622	0.0558386
0	0.0522508
0.371099	0
0.471026	0.0789959
0.402787	0.0466151
0	0
0.390306	0.0763602
0.290518	0.0503786
0.186908	0
0	0.0755519
0.156709	0
0.28814	0
0.357872	0.0382255
0.516507	0.0877673
0	0
0.359226	0.0633407
0.585628	0.126173
0.566943	0.0853323
0	0
0.262005	0
0	0
0.516685	0.0821215
0.209093	0.0468753
0.320602	0.0559624
0.402325	0.0474455
0.341412	0.0380703
0	0
0.300904	0.0474688
0.177301	0
0.16314	0
0.484693	0.0628605
0.422851	0.0545094
0	0.0685387
0.48801	0.07059
0.336707	0.0535878
0.5046	0.0830614
0.431157	0.0856849
0	0
0	0
0.3145	0.0731145
0.36932	0.0673198
0.517847	0.0907086
0.481276	0.0966469
0	0
0.286305	0
0	0
0.277756	0.0609903
0.697567	0.17327
0.352344	0.0420781
0.216456	0
0	0
0.658249	0.12402
0	0
0.242666	0.0587137
0.463805	0.0802895
0.232042	0
0.237689	0
0	0
0.446503	0.0797776
0.408713	0.0549142
0.476271	0.0671004
0.265742	0.041098
0.242254	0
0	0
0.365917	0.0758879
0.286261	0.0555805
0	0
0	0.0333959
0.300889	0.0380302
0.331393	0.0518385
0.377556	0.0597845
0.266592	0
0.347911	0.128001
0	0
0	0
0	0
0	0
0.270393	0
0.208715	0
0	0
0	0.0359647
0	0
0.297263	0.0364814
0	0
0.247575	0.0423538
0	0.0526162
0.244381	0.0347846
0.421753	0.13517
0.338866	0
0	0
0.458492	0.074603
0.173646	0
0	0
0	0.079711
0.23188	0.036347
0.312203	0.040111
0.314815	0.0384835
0.338316	0.0520259
0	0
0.188445	0.0560933
0.438456	0.0983051
0.508754	0.105391
0.159329	0.0347899
0.16884	0
0.188432	0.0477102
0.479267	0.0623421
0.224681	0.0383194
0.284081	0.0464562
0.320903	0.0812672
0.156857	0.0543089
0.153871	0
0.282201	0
0.247508	0
0	0
0.474862	0.0581687
0.416582	0.0677294
0	0.0929348
0.310598	0.064151
0.246448	0
0.475809	0.105375
0.460502	0.0928175
0	0
0	0
0.333497	0.0487686
0.403932	0.0591525
0.472537	0.0847457
0.398501	0.121711
0	0
0.209438	0
0.166458	0
0.341849	0.0551462
0.269344	0.0483214
0.375439	0.0429748
0.282204	0.0675953
0	0
0.520108	0.102086
0	0
0.191011	0.0385612
0.339404	0.0596516
0.177827	0.0349787
0.221567	0
0.293889	0.0561201
0.175861	0
0.214886	0.0393055
0.33751	0.059443
0	0
0	0
0.222952	0
0	0
0	0
0	0
0.235371	0.0476473
0	0
0	0.0359008
0	0
0	0
0.190542	0
0	0
0	0
0	0.0453537
0.202191	0.0326302
0	0
0	0
0.217743	0
0	0
0.165654	0
0	0
0.234555	0
0	0
0.279936	0.0343217
0.253784	0.0428856
0.297447	0
0	0
0	0
0.312672	0.0587748
0.248678	0.050656
0	0
0	0
0.190181	0
0.289542	0.0402035
0.266926	0.040599
0	0
0.20345	0
0.178947	0
0.249208	0
0	0
0	0
0	0
0.266546	0
0	0
0	0
0.157361	0.0398951
0.183197	0
0.222317	0.0351812
0.156321	0
0.248091	0
0	0
0.164894	0
0.202036	0
0	0.0502164
0.303932	0.0608011
0	0
0.263966	0.0378714
0.202786	0
0	0
0	0
0	0
0.158487	0
0	0
0.172399	0
0	0
0.220945	0.0460261
0	0
0.150456	0
0	0
0.151355	0
0	0
0	0
0.256668	0
0	0
0.193159	0
0	0
0	0
0	0
0	0
0	0
0	0
0	0
0	0
0.213991	0
0.159505	0
0	0
0.352056	0.0344807
0	0
0.201374	0
0.186993	0
0	0
0	0
0.222687	0
0.344318	0.0364006
0.152653	0
0	0
0	0
0	0
0.216973	0
0.251366	0
0	0
0	0
0	0
0	0
0	0
0	0
0	0
0	0
0	0
0	0
0	0
0	0
0	0
0	0
0	0
0	0
0	0
0	0
0	0
0.151582	0.0390523
0	0
0.412771	0.0668852
0	0
0.216937	0
0	0.0375012
0.260542	0
0	0
0	0
0	0
0.221144	0
0	0
0.17803	0
0	0
0.172907	0.0469562
0	0
0	0
0	0
0	0
0.18504	0
0	0
0.185449	0
0.174502	0
0.219848	0
0.230844	0
0	0
0	0
0.313124	0
0.171783	0
0.244657	0.0373661
0.200652	0
0	0
0.215561	0
0.203827	0
0.261256	0
0	0
0.185253	0.0394024
0.313637	0.0472785
0.226975	0.0497789
0.606291	0.174269
0.320829	0.0506312
0.518399	0.0925633
0.461743	0.104354
0.349656	0.0457551
0	0
0.274912	0.059997
0	0
0	0
0	0
0.332353	0.0547799
0.16906	0.0375238
0.307788	0.0544193
0.355533	0.0619003
0.274244	0.0689091
0	0
0	0
0	0
0	0
0.343338	0.0576917
0.151321	0.0396827
0	0
0	0
0.171856	0
0.498256	0.0723235
0	0
0.510156	0.0710975
0.148453	0
0.230758	0.0413588
0.518376	0.105543
0.514144	0.115745
0	0
0.378289	0.0528174
0.336829	0.0530487
0	0.0448599
0	0.179072
0.306412	0.0429172
0.303886	0.0492238
0.408208	0.0788408
0.643982	0.119916
0	0
0.470443	0.0770574
0.587662	0.128234
0.632381	0.136728
0	0
0.314326	0
0	0
0.538357	0.0954555
0	0
0.369053	0.046132
0.452733	0.0924699
0.295158	0.0622759
0	0
0.341637	0.0818972
0.256377	0.0363642
0	0
0.509088	0.0890257
0.458939	0.0988081
0	0.192438
0.538255	0.0665944
0.353171	0.0475642
0.540284	0.120927
0.484948	0.100308
0	0
0	0
0.402922	0.0670756
0.447674	0.0907751
0.512836	0.0879144
0.503879	0.140688
0	0
0.275899	0.0450039
0	0
0.416752	0.101944
0.494934	0.0868867
0.301945	0.0399837
0.233439	0
0	0
0.733069	0.157679
0.244725	0
0.157691	0
0.334169	0.0502075
0.235556	0
0.193773	0.0389343
0.203988	0
0	0
0	0
0.302441	0.0415333
0	0
0.168938	0
0.204428	0
0.214447	0.0352589
0.25561	0
0	0
0.156253	0
0	0.0762334
0.279502	0.0503004
0	0
0	0
0	0
0.188304	0.0416937
0.148522	0
0	0
0	0
0	0
0.236816	0.038153
0	0
0.174401	0.0440786
0	0
0.367341	0.0407676
0.255624	0.0461929
0.170204	0
0	0
0	0
0.227918	0.0567743
0	0
0	0.0493615
0	0
0.167584	0.0393679
0.159252	0
0.284871	0.0504225
0	0
0.150148	0
0.333868	0.0555822
0.282293	0.052084
0	0
0.244138	0
0	0
0.370563	0.0753283
0.225206	0
0	0
0.162002	0
0.175856	0
0.235785	0
0	0
0	0
0	0
0.256308	0
0.19874	0.0453407
0	0.0396075
0.25446	0.0470864
0	0
0.280766	0.0649726
0.178351	0
0	0
0	0
0.167495	0
0.275119	0
0.207347	0
0.248613	0.0452817
0	0
0.216961	0
0	0
0.235609	0.0595214
0.151914	0
0.215794	0.0360834
0.179735	0
0	0
0.253406	0
0.171607	0
0.276976	0.0611856
0.231776	0
0	0
0	0.0473413
0	0.0372683
0	0
0.285492	0.0407681
0	0
0	0.0501901
0	0
0.192243	0
0.291234	0.0610813
0.174205	0.0502147
0.17672	0
0	0
0.219067	0.0390949
0	0
0.241506	0
0	0
0	0
0.188986	0
0	0.0429903
0.209281	0
0.224703	0
0.170163	0
0	0
0	0
0	0.0365177
0	0
0.262908	0.0430422
0.170161	0
0	0
0.157406	0
0	0
0	0
0	0.0383543
0	0
0	0
0.167945	0
0.262412	0.0377753
0	0
0.258744	0.0567597
0.319979	0.0403802
0.201616	0
0.199195	0.0424986
0	0
0.242481	0
0.321926	0.0466773
0.178184	0
0	0
0	0
0	0
0	0
0.196508	0
0.149287	0
0	0
0.215753	0.0531888
0	0
-0.16163	0.0585026
0.218694	0.0370656
0.223304	0
0.236156	0
0	0
0	0
0	0
0.221831	0.051049
0.251357	0.0419435
0.209768	0.0408129
0.153704	0
0	0
0.163212	0
0	0
0.205313	0
0.152953	0
0.192132	0
0.259547	0
0	0
0.280276	0.0446437
0.229737	0.0517542
0.254739	0
0.219603	0.0497706
0.267029	0.0433274
0	0
0	0
0.191337	0
0	0
0	0.0471781
0	0
0.161135	0.0413481
0	0
0.216071	0.0458743
0	0
0	0
0.149043	0
0.151931	0
0.208992	0
0	0
0	0
0.237974	0
0	0
0	0
0.169745	0
0	0
0.162245	0
0	0
0	0
0	0
0.2766	0.0457664
0.278989	0.0558852
0	0
0	0
0	0
0	0
0	0.0553024
0	0
0	0
0.229832	0.0404012
0.203646	0.0723429
0	0
0	0
0.233646	0.0511778
0.206471	0.0476032
0	0
0	0
0.18518	0
0	0
0.231861	0
0.15547	0.0398259
0.227631	0.056369
0.185292	0
0.189314	0
0.214093	0.0393567
0.262742	0.0377592
0	0
0	0
0	0
0	0.0628766
0.207791	0.0465621
0.245405	0
0.213199	0.0422277
0.187111	0.0453669
0	0
0	0
0.248519	0
0.249362	0.0335049
0.207341	0
0.259585	0.0532545
0.151159	0
0	0
0	0
0	0
0.199802	0
0.185587	0.0346454
0	0.046317
0.178841	0
0.218482	0.0573371
0.278476	0.0371877
0.448297	0.0772006
0.507833	0.125856
0.249384	0
0.193501	0
0.303112	0.0731097
0.217505	0.055114
0	0
0.218656	0
0.391208	0.0735135
0.15673	0.0381911
0.273507	0.0878522
0.27966	0.0557119
0.284286	0.0661854
0	0
0	0
0	0.0383593
0	0
0.398683	0.0812092
0.193241	0.0510129
0	0
0	0
0	0
0.480044	0.0909632
0	0
0.398752	0.0803441
0.150457	0.0529067
0.398914	0.0668522
0.444555	0.0832588
0.494716	0.0873216
0	0
0.369872	0.0640288
0.314612	0.0567777
0	0
0	0.168999
0.235315	0.0474994
0.333673	0.0556797
0.434963	0.0727805
0.615715	0.136472
0	0
0.398218	0.0665045
0.575462	0.118531
0.52067	0.100539
0	0
0.22788	0.0567095
0	0
0.485629	0.0880566
0.269207	0
0.357085	0.0646657
0.465459	0.0608235
0.358655	0.0619724
0.234118	0
0.306855	0.0710024
0.274026	0.0493946
0	0
0.588764	0.123928
0.411615	0.0702669
0	0.294091
0.504478	0.0936273
0.261385	0.047459
0.529569	0.128643
0.449368	0.114943
0	0
0	0
0.39778	0.090672
0.443153	0.102436
0.501885	0.0742368
0.512484	0.121207
0	0
0.257643	0.0359822
0	0
0.396357	0.0491402
0.466575	0.0977126
0.278461	0
0.243765	0.0391834
0	0
0.660258	0.186184
0.397006	0.0541647
0.196091	0
0.169486	0
0	0
0.285772	0
0.261052	0
0	0
0	0
0.252102	0.0374992
0.293503	0.0551627
0.293754	0.0457596
0.244295	0
0.231362	0.0493607
0	0
0	0
0	0
0	0
0.253135	0
0.306398	0
0.175738	0
0	0
0.19616	0
0	0
0	0
0	0
0	0
0.241382	0
0.186035	0
0.202579	0.0416491
0.177005	0
0.378181	0.0598164
0	0
0	0
-0.171564	0.0574418
0.153	0
0.269177	0
0.183996	0
0.308327	0.0393971
-0.179758	0
0	0
0.330604	0.0556584
0.342787	0.0692989
0	0
0.165071	0
0	0
0.292709	0
0.186925	0
0.29533	0
0.265659	0.0557765
0.234497	0
0	0
0.295482	0.0416185
0	0
0.182501	0
0.34462	0.0557956
0.224627	0
0	0.049239
0.23445	0.0429571
0.150705	0
0.362827	0.0397221
0.21686	0.0380418
0	0
0	0
0.236618	0
0.236204	0
0.327133	0.0352593
0.200733	0.0418807
0	0
0.229426	0.0373478
0.173406	0
0.194608	0.060559
0.156546	0
0.284866	0
0	0
0	0
0.30479	0
0.45305	0.102773
0.255986	0
0	0
0.252548	0.038552
0.148671	0
0	0
0	0
0.293424	0.0755098
0	0
0.425112	0.0498119
0.333665	0.057125
0.31697	0.109982
0	0
0	0
0	0
0	0
0.447779	0.0369338
0	0
0	0
0	0
0	0
0.457573	0.103914
0	0
0.330396	0.0465854
0	0
0.325616	0.0453017
0.463084	0.0734092
0.46464	0.0855714
0	0
0.38947	0.0430142
0.278114	0.0369672
0	0
0	0.102445
0.229782	0.0516055
0.208186	0
0.424514	0.0764041
0.421177	0.0543829
0	0
0.235024	0.049823
0.468372	0.0707571
0.612989	0.134427
0	0
0.354594	0.0427326
0	0
0.484567	0.0847476
0.196379	0
0.300388	0
0.431365	0.0594954
0.373566	0.0425801
0	0
0.322822	0.0376177
0.309076	0.0458811
0	0
0.535466	0.0945032
0.478978	0.0720612
0	0.0698121
0.459865	0.0952021
0.275585	0
0.514897	0.0836221
0.484957	0.103655
0	0
0	0
0.284329	0
0.379795	0.0676066
0.557561	0.0773265
0.423137	0.0624929
0	0
0.332339	0.0517421
0	0
0.245529	0
0.334488	0.0387417
0.293002	0.0488989
0.174556	0
0	0
0.558025	0.0980939
0.194571	0
0	0
0	0
0	0
0	0
0	0
0.332618	0.0420124
0	0
0.177174	0.0539423
0.294005	0.049504
0.236268	0
0	0
0	0
0	0
0	0
0.465597	0.0956287
0	0
0	0
0	0
0.246076	0
0.429478	0.0622378
0	0
0.391791	0.0561999
0	0.0368478
0.369063	0.0494481
0.301269	0.0589346
0.825969	0.251164
0	0.0327826
0.325897	0.0445926
0.32323	0.0413701
0.205179	0.0426698
0	0.103746
0.202088	0
0.206458	0
0.781504	0.205482
0.411968	0.0703555
0	0
0.342831	0.046907
0.352101	0.0653697
0.5448	0.0828399
0	0
0.295126	0
0	0
0.390485	0.0488868
0	0
0.271714	0.0406568
0.605522	0.104681
0.482722	0.052987
0.205669	0
0.188428	0
0.185464	0
0	0
0.464249	0.086163
0.34614	0.0375597
0	0.0968775
0.551162	0.118079
0.284384	0
0.345951	0.0485165
0.39371	0.0528994
0	0
0	0
0.344558	0.0407154
0.425229	0.0697329
0.452976	0.0674268
0.357185	0.0480511
0	0
0.257664	0.0435021
0	0
0.249587	0
0.36662	0.0379776
0.193085	0
0	0.0416857
0	0
0.463844	0.073398
0	0
0	0
0	0
0	0
0.158469	0
0.257289	0
0.163569	0
0	0
0.234068	0
0	0
0	0
0	0
0	0
0.181587	0
0.224774	0
0	0
0	0
0	0
0.164477	0
0.240125	0
0	0
0.213347	0.0395635
0	0
0.199754	0
0.166044	0
0	0
0	0
0.254844	0
0	0
0	0
0.151723	0.038833
0.54233	0.123823
0.149904	0
0.164165	0
0.254756	0
0	0
0.172729	0.0386115
0.226063	0
0.284698	0
0.161777	0
0	0
0	0
0.23983	0
0.169571	0
0.16905	0
0.198813	0
0	0
0	0
0.179645	0.0375194
0	0
0	0
0.312433	0.039211
0.216786	0
0	0
0.357438	0.055106
0.212039	0
0.208503	0
0.279973	0
0	0
0	0
0.147657	0
0.208531	0
0.246626	0
0.188332	0
0	0
0	0
0	0
0.158169	0
0.178696	0
0	0
0	0
0	0
0.284774	0
0	0
0	0
0	0
0	0
0.196369	0.0437866
0	0.0354077
0	0
0	0
0	0
0	0
0	0
0	0
0	0
0.190354	0.0375921
0	0
-0.221686	0
0	0
0	0
0	0
0	0
0	0
0	0
0	0
0	0
0	0
0	0
0	0
0	0.0461769
0	0
0	0
0	0
0	0
0	0.0472323
0	0
0	0
0	0
0	0
0	0
0	0
0	0
0	0
0.156271	0
0	0
0	0
0.15434	0
0.166854	0
0	0
0	0
0	0
0	0
0	0
0	0
0	0
0	0
0	0
0	0
0	0
0	0
0	0.0471736
0	0
0	0
0	0
0	0
0	0
0	0.0411058
0	0
0.173454	0
0	0
0	0
0	0
0	0
0	0
0.253185	0
0.183032	0
0	0
0.195889	0
0.207731	0
0.342517	0.0599385
0.317131	0.0420382
0.243252	0
0	0
0.171196	0
0.324144	0.0681117
0.156208	0
0.171945	0
0.217825	0
0.208744	0
0	0
0	0
0	0
0	0
0	0
0	0
0	0
0.202858	0.0566228
0	0
0	0.0385325
0.322272	0
0	0
0.236517	0
-0.236283	0.0459067
0	0
0.241124	0.0490029
0	0
0.231557	0.0458179
0	0
0	0
0.290712	0.0553996
0.292214	0.0516235
0.270507	0.0661844
0.202191	0
0.201677	0
0.352667	0.0430813
0.23427	0.0734086
0	0
0	0.035041
0	0.0333778
0.212111	0
0	0
0.264186	0.0376566
0.264834	0
0.302067	0.0468709
0.28197	0
0	0.0605763
0	0
0.163748	0.0400136
0.479948	0.0843774
0.194824	0
0	0
0	0
0	0
0.16448	0
0.297436	0
0.249078	0.0452872
0	0
0.171911	0
0.175729	0
0	0
0	0
0.324476	0.048414
0.304275	0.0737055
0	0.0558308
0.310089	0.0465645
0	0
0.15562	0
0	0
0.206174	0
0	0
0	0.0460076
0.149014	0.0361583
0.240788	0
0	0
0	0
0.25899	0.0442229
0.201554	0
0.179663	0
0.209077	0
0	0
0.170428	0
0	0
0	0
0	0
0	0.0376623
0	0
0.185922	0.043061
0	0
0.164962	0
0	0.0384926
0	0
0	0
0	0
0	0
0.212887	0.0381547
0	0
0.190591	0
0	0
0	0
0.21825	0.0420782
0	0.0366258
0.176312	0
0	0
0	0
0.173909	0
0	0
0.205645	0.040135
0	0
0.174048	0.0775639
0	0
0.149764	0
0.268768	0
0.183114	0
0.186299	0.0398795
0	0.0404228
0	0.0519269
0	0
0	0
0.169935	0
0.175525	0
0	0
0	0
0	0
0	0
0	0
0.211317	0.0622827
0	0
0	0.0383617
0.149025	0
0	0
0	0
0.259603	0
0.250495	0
0	0
0.228773	0.0462018
0.166785	0
0	0
0	0
0	0
0	0
0	0
0.169241	0.0442032
0.244625	0.0372128
0.159629	0
0	0
0	0
0	0
0.182021	0
0.231273	0
0.179557	0.0372309
0	0
0.180133	0
0	0
0	0
0	0
0	0
0	0
0	0
0	0
0	0
0	0
0	0
0	0
0	0
0	0
0	0
0	0
0	0
0.167669	0
0	0
0.220879	0.0599888
0.163663	0
0.184281	0.0514243
0	0
0.195758	0
0	0
0	0
0	0
0	0
0	0
0	0
0	0.0459303
0	0
0	0
0	0
0	0
0	0
0	0
0	0
0.187	0
0.158224	0
0	0
0	0
0	0
0	0
0.212526	0
0	0
0.207808	0
0	0.0461087
0	0
0.217145	0
0	0
0.162311	0
0	0
0.18067	0
0	0
0	0
0	0
0	0
0.195417	0
0.331562	0
0	0.0491168
0.185051	0
0.1678	0
0.17466	0
0	0
0.283893	0.048847
0	0
0.158355	0
0	0
0	0
0	0
0.246226	0.0406169
0	0
0	0
0	0
0	0.0371092
0	0
0	0
0	0
0.261692	0
0	0
0	0
0.201998	0.0342356
0	0
0.317071	0.046103
0.215386	0
0	0
0.458649	0.0539662
0	0
0	0
0.212578	0
0	0
0	0
0	0
0	0
0.2953	0
0.26452	0.0450395
0.196033	0
0.1536	0
0	0
0	0
0	0.0359821
0	0
0	0
0.158715	0
0	0
0.266536	0
0	0
0	0
0	0.0403614
0.207025	0
0	0
0.22432	0
0.182055	0
0	0
0	0
0	0
0.251843	0
0	0
0	0
0.180254	0
0	0
0.234577	0
0.329327	0.0361821
0.254263	0.0604333
0	0
0	0
0	0
0.175767	0
0.356372	0.0373183
0.302041	0
0	0
0	0
0.163016	0
0.2938	0.0511769
0	0
0.338199	0.0505892
0	0
0.242572	0
0.238744	0.051106
0.276682	0.0332981
0	0
0.348416	0.0599093
0.254152	0
0	0
0	0.0739859
0.258161	0.0409318
0.177036	0
0.260734	0.0634734
0.391654	0.0655848
0	0
0.306597	0.0720056
0.401326	0.0910971
0.370718	0.0648142
0	0
0.283429	0.042036
0	0
0.459175	0.072525
0	0
0.323541	0.0673621
0.397039	0.0635132
0.368511	0.0565567
0	0
0.17108	0
0	0
0	0
0.473531	0.079982
0.391529	0.0576539
0	0.0580969
0.417757	0.0771438
0.235725	0.0382892
0.365493	0.051011
0.412713	0.110307
0	0
0	0
0.18186	0
0.341386	0.0637768
0.437012	0.0742219
0.352558	0.0756511
0	0.0336333
0.260062	0.0485036
0	0
0.237412	0.0607097
0.337971	0.0648288
0.207698	0
0.219448	0
0	0
0.447457	0.0855324
0	0
0	0
0	0.0419756
0	0
0	0
0.175348	0.0332767
0.318562	0
0	0
0.201251	0
0	0
0.169634	0
0	0
0	0
0	0
0.199414	0.0411753
0	0
0	0
0.234336	0.0527433
0	0
0	0
0	0.0403411
0	0
0	0.0373869
0	0.0379639
0	0
0	0.035489
0	0
0	0.0399567
0	0
0	0
0.188542	0
0.281869	0
0.282782	0
0	0
0	0
0.200541	0.0538923
0.155148	0
0	0
0	0
0	0
0.163256	0
0.217476	0
0	0
0	0
0	0.0342564
0	0
0	0
0	0
0	0
0.216781	0
0	0.0430693
0	0
0	0
0	0
0.191607	0
0	0
0	0
0	0
0	0
0	0
0.190265	0
0	0.0370606
0.238139	0
0	0
0	0
0.178622	0
0.237411	0.0404112
0.245139	0.0451545
0	0
0	0
0.208473	0.041672
0	0
0.264237	0.0394993
0.214135	0
0	0
0	0
0.149761	0
0.227444	0.0512236
0	0
0.183457	0.0487305
0	0.049135
0	0
0.426156	0.105077
0.171102	0.0484883
0	0
0.31233	0.0575566
0.180524	0
0	0
0	0.0444982
0.312038	0
0.261216	0.0514552
0.200499	0.0467416
0.166293	0.035511
0	0
0	0.0439188
0.360851	0.0836944
0.362547	0.062329
0	0
0.175101	0
0.170349	0
0.286479	0.0551836
0.17855	0
0.292877	0
0.217278	0.035057
0.306872	0.0603923
0	0.0383212
0.254934	0
0.21414	0
0	0
0.295625	0.040043
0.295739	0
0	0.0735142
0.152369	0.0465213
0.174526	0.0582725
0.446879	0.087052
0.411368	0.0914703
0	0
0	0
0.240692	0.0441626
0.256078	0.0371599
0.408242	0.0576158
0.371784	0.0855875
0	0
0.194064	0
0	0
0	0.0349942
0.192429	0.0363057
0.275185	0.0615866
0	0
0	0
0.350546	0.0735406
0.263031	0.0385486
0	0
0	0
0	0.0495712
0.304262	0.0390945
0.258097	0
0.205195	0
0	0
0	0
0	0
0.297923	0
0	0
0.379552	0.0542764
0	0
0.156837	0
0.169485	0
0.230756	0.0446359
0	0
0.258222	0
0.2077	0
0.213958	0.0347868
0	0.0565567
0	0
0.183508	0
0.224156	0.044808
0.270993	0.0527452
0	0
0.209399	0
0.321767	0.058825
0.441762	0.114255
0	0
0.302901	0
0.198538	0
0.355393	0.0371993
0.204785	0
0	0.0441463
0.285897	0
0.269596	0
0	0
0	0.0504745
0	0
0	0
0.287036	0.0381065
0.406545	0.048365
0	0.0424332
0.275739	0.0432073
0.193293	0
0.431448	0.0840636
0.190109	0
0	0
0	0
0	0
0.196816	0
0.300503	0.0440141
0.169124	0.0465593
0	0
0.153582	0
0	0
0.244547	0.0389618
0.375938	0.0437295
0.169924	0.0550641
0	0
0	0
0.355666	0.0807165
0	0
0	0
0	0
0.184477	0
0.221517	0
0	0
0	0
0	0
0	0
0.28917	0.061795
0	0
0.173569	0.047643
0	0.0491159
0.201428	0
0.340002	0.0931719
0.266616	0
0	0
0.349142	0.073585
0	0
0	0
0	0.0795312
0.194412	0.0378283
0.217903	0.0420538
0.277575	0.0411364
0.270293	0.0587684
0	0
0	0.0591927
0.211198	0.0876375
0.348448	0.0684739
0	0
0	0
0	0
0.345602	0.0891742
0	0
0.206685	0
0.269372	0.0487455
0.293779	0.0715326
0	0
0.187181	0
0	0
0	0
0.301519	0.102897
0.309571	0.0726985
0	0.0595724
0.300712	0.0571843
0	0
0.344089	0.093716
0.292525	0.12804
0	0
0	0
0.22325	0.038891
0.217329	0.0366628
0.328489	0.108357
0.392116	0.107039
0	0
0.282002	0.0471891
0	0
0	0.0796708
0.282005	0.0728169
0.247923	0.076914
0	0
0	0
0.375061	0.0923632
0	0
0	0
0.16935	0
0.198643	0
0.171005	0
0	0
0.236434	0
0.315204	0.0603438
0	0
0.166017	0.0386052
0	0.0424059
0	0.043965
0	0
0.189303	0
0	0
0.369184	0.0492605
0	0
0	0
0	0
0	0
0	0.0362232
0	0
0	0
0	0
0	0
0	0
0	0
0	0
0	0
0.206572	0
0.21714	0
0	0
0.210577	0
0	0
0	0
0.229848	0
[truncated: 1,917 more rows]

## Sheet: Fig7
S.No	Stock	based on correlation coefficient			based on mutual information
		pre election period	election period	post election period	pre election period	election period	post election period
1	ABB	1	2	1	1	1	1
2	ACC	1	2	2	1	1	1
3	ADANIPORTS	1	1	4	1	1	1
4	AMBUJACEM	2	2	2	1	2	2
5	ASHOKLEY	1	1	2	1	1	2
6	ASIANPAINT	1	3	1	1	1	1
7	AUROPHARMA	2	1	1	1	1	1
8	AXISBANK	2	1	3	2	1	2
9	BAJAJ-AUTO	1	1	1	1	1	1
10	BAJFINANCE	1	1	1	2	1	1
11	BAJAJFINSV	1	3	1	1	2	1
12	BANKBARODA	8	9	1	8	9	1
13	BEL	1	1	1	5	2	1
14	BHEL	1	2	1	1	2	2
15	BPCL	2	1	1	1	1	1
16	BHARTIARTL	2	2	1	3	2	1
17	INFRATEL	1	1	1	1	1	1
18	BOSCHLTD	2	1	2	1	8	1
19	BRITANNIA	1	1	1	1	1	1
20	CADILAHC	1	1	1	1	1	1
21	CIPLA	1	1	1	1	1	2
22	COALINDIA	1	2	1	1	2	1
23	COLPAL	1	1	1	1	1	1
24	CONCOR	1	3	1	33	1	1
25	CUMMINSIND	1	2	2	1	1	1
26	DLF	3	1	1	3	2	1
27	DABUR	1	1	1	1	1	1
28	DIVISLAB	3	1	1	1	1	1
29	EICHERMOT	1	1	1	1	1	1
30	EMAMILTD	1	1	1	1	1	1
31	GAIL	1	3	1	1	1	1
32	GSKCONS	1	1	1	1	1	1
33	GLAXO	1	1	2	1	2	25
34	GLENMARK	2	1	2	1	1	1
35	GODREJCP	1	1	1	1	1	1
36	GRASIM	1	1	1	1	2	2
37	HCLTECH	1	1	1	1	1	1
38	HDFCBANK	1	2	1	1	2	1
39	HAVELLS	1	1	1	1	1	1
40	HEROMOTOCO	1	2	1	1	1	1
41	HINDALCO	1	1	2	1	1	1
42	HINDPETRO	2	3	3	3	3	3
43	HINDUNILVR	1	1	1	2	1	1
44	HINDZINC	1	1	1	1	1	1
45	HDFC	1	1	1	1	1	1
46	ITC	1	3	2	1	3	2
47	ICICIBANK	22	4	11	8	3	15
48	IDEA	1	1	3	1	2	1
49	IBULHSGFIN	1	1	1	1	1	1
50	IOC	1	1	2	1	1	1
51	INDUSINDBK	4	1	1	1	1	1
52	INFY	1	2	1	1	4	1
53	KOTAKBANK	1	1	1	2	1	1
54	LICHSGFIN	4	1	5	1	2	2
55	LT	4	1	3	2	2	8
56	LUPIN	1	1	1	1	1	1
57	M&M	1	2	1	1	1	1
58	MARICO	1	1	1	1	1	1
59	MARUTI	1	1	1	1	1	1
60	MOTHERSUMI	1	1	1	1	1	1
61	NMDC	2	1	1	1	2	1
62	ONGC	1	2	3	1	2	2
63	OIL	1	1	1	1	1	1
64	OFSS	1	2	1	1	11	1
65	PETRONET	1	1	2	1	1	1
66	PIDILITIND	1	1	1	1	1	1
67	PEL	1	2	1	1	1	1
68	PFC	2	1	3	1	2	2
69	POWERGRID	1	1	1	1	1	1
70	PNB	6	6	7	3	11	11
71	RELIANCE	4	6	4	3	8	3
72	SHREECEM	1	1	2	1	6	1
73	SIEMENS	4	3	3	1	1	1
74	SAIL	1	1	2	1	1	1
75	SUNPHARMA	2	1	3	2	1	3
76	TCS	2	3	3	3	2	3
77	TATAMTRDVR	1	1	1	2	1	1
78	TATAMOTORS	2	2	3	2	2	2
79	TATAPOWER	2	2	1	1	1	1
80	TATASTEEL	3	6	9	5	5	4
81	TECHM	2	1	1	1	1	1
82	TITAN	1	1	1	1	1	1
83	TORNTPHARM	1	1	1	1	1	1
84	UPL	2	2	1	1	1	1
85	ULTRACEMCO	1	2	1	1	1	1
86	UBL	2	2	1	1	1	1
87	MCDOWELL-N	2	1	1	1	1	1
88	WIPRO	1	1	1	1	1	1
89	YESBANK	16	27	21	14	10	11

## Sheet: Fig8
Source	Target	Type	Weight				Id	Label	Category	Weights
1	23	Undirected	0				1	ACC	Markowitz	0.037719
1	33	Undirected	0.0203385				2	AMBUJACEM	Markowitz	0.000233884
1	38	Undirected	0				3	ASIANPAINT	Markowitz	0.134263
1	44	Undirected	0				4	AUROPHARMA	Markowitz	0.000591642
2	14	Undirected	0.0231874				5	BAJAJ-AUTO	Markowitz	0.0173155
2	22	Undirected	0.0245255				6	BAJAJFINSV	Markowitz	0.00987384
3	9	Undirected	0.026815				7	BANKBARODA	Markowitz	0.0628514
3	24	Undirected	0.024207				8	BPCL	Markowitz	0.00911332
3	25	Undirected	0.0193447				9	INFRATEL	Markowitz	0
3	34	Undirected	0.0233947				10	BRITANNIA	Markowitz	0.0201418
4	11	Undirected	0.0234875				11	CADILAHC	Markowitz	0.0122111
5	24	Undirected	0.0216359				12	CIPLA	Markowitz	0
6	32	Undirected	0.0214667				13	COLPAL	Markowitz	0
7	16	Undirected	0.0233939				14	CONCOR	Markowitz	0.0221383
7	29	Undirected	0.0228043				15	CUMMINSIND	Markowitz	0
8	43	Undirected	0.0207132				16	DLF	Markowitz	0.0691333
9	12	Undirected	0.0227423				17	DABUR	Markowitz	0.0247138
9	14	Undirected	0.0371981				18	DIVISLAB	Markowitz	0.0045641
9	19	Undirected	0.0330604				19	EMAMILTD	Markowitz	0.00989368
9	21	Undirected	0.0611619				20	GAIL	Markowitz	0.0100508
9	28	Undirected	0.0243196				21	GODREJCP	Markowitz	0.0103294
9	29	Undirected	0.0272477				22	HDFCBANK	Markowitz	0.0407283
9	43	Undirected	0.0239274				23	HEROMOTOCO	Peripheral	0.0168231
10	29	Undirected	0.0266128				24	HINDPETRO	Markowitz	0
11	21	Undirected	0.0210162				25	HINDUNILVR	Markowitz	0.0112505
11	37	Undirected	0.0210386				26	HDFC	Markowitz	0
12	13	Undirected	0.0208398				27	ITC	Markowitz	0.0122327
12	30	Undirected	0.0260535				28	IDEA	Markowitz	0.0198911
14	18	Undirected	0.0223086				29	IBULHSGFIN	Markowitz	0
14	31	Undirected	0.0193851				30	IOC	Markowitz	0.00925714
14	32	Undirected	0.0382464				31	LICHSGFIN	Markowitz	0.0601157
15	29	Undirected	0.0213958				32	MARICO	Markowitz	0.0108573
16	39	Undirected	0.0216596				33	MOTHERSUMI	Peripheral	0.054009
17	30	Undirected	0.0262661				34	OIL	Markowitz	0.0368981
18	26	Undirected	0.0197021				35	PETRONET	Markowitz	0.0262302
18	42	Undirected	0.027472				36	PIDILITIND	Markowitz	0.0307636
19	41	Undirected	0.0227311				37	PNB	Markowitz	0.0398791
20	21	Undirected	0.0217579				38	RELIANCE	Markowitz	0
24	35	Undirected	0.0177915				39	SAIL	Peripheral	0.0383441
27	43	Undirected	0.0206576				40	TATASTEEL	Peripheral	0
29	36	Undirected	0.02906				41	TITAN	Markowitz	0
37	40	Undirected	0.0189562				42	TORNTPHARM	Markowitz	0
39	44	Undirected	0.282021				43	ULTRACEMCO	Markowitz	0.0670196
							44	MCDOWELL-N	Peripheral	0.0705629

## Sheet: Fig9
Portfolio with 3 peripheral stocks corresponding to method 3,4 and 5																Portfolio with 5 peripheral stocks corresponding to method 3,4 and 5																Portfolio with 10 peripheral stocks corresponding to method 3,4 and 5
	Method 1(Markowitz with simple correlation)			Method 2(Markowitz with exponential correlation)			Method 3(MST based on simple correlation)			Method 4(MST based on exponential correlation)			Method 5(MST based on mutual information)				Method 1(Markowitz with simple correlation)			Method 2(Markowitz with exponential correlation)			Method 3(MST based on simple correlation)			Method 4(MST based on exponential correlation)			Method 5(MST based on mutual information)				Method 1(Markowitz with simple correlation)			Method 2(Markowitz with exponential correlation)			Method 3(MST based on simple correlation)			Method 4(MST based on exponential correlation)			Method 5(MST based on mutual information)
tick	average return	standard deviation	ratio (r/s)	average return	standard deviation	ratio (r/s)	average return	standard deviation	ratio (r/s)	average return	standard deviation	ratio (r/s)	average return	standard deviation	ratio (r/s)	tick	average return	standard deviation	ratio (r/s)	average return	standard deviation	ratio (r/s)	average return	standard deviation	ratio (r/s)	average return	standard deviation	ratio (r/s)	average return	standard deviation	ratio (r/s)	tick	average return	standard deviation	ratio (r/s)	average return	standard deviation	ratio (r/s)	average return	standard deviation	ratio (r/s)	average return	standard deviation	ratio (r/s)	average return	standard deviation	ratio (r/s)
1	-2.94291e-06	0.000188508	-0.0156116	-2.9409e-06	0.000200531	-0.0146656	-1.47235e-05	0.000374365	-0.0393293	-1.41978e-05	0.000355926	-0.0398898	-1.16325e-05	0.00034988	-0.0332471	1	-2.94291e-06	0.000188508	-0.0156116	-2.9409e-06	0.000200531	-0.0146656	-1.34662e-05	0.000289204	-0.0465628	-1.34794e-05	0.000279268	-0.0482668	-1.05848e-05	0.000278274	-0.0380374	1	-2.94291e-06	0.000188508	-0.0156116	-2.9409e-06	0.000200531	-0.0146656	-1.2405e-05	0.000207579	-0.0597605	-1.35639e-05	0.000201062	-0.0674614	-9.53341e-06	0.000209942	-0.0454097
2	-7.79956e-06	0.00029723	-0.0262408	-8.82595e-06	0.000317774	-0.0277743	-2.5488e-05	0.000527951	-0.0482772	-2.41152e-05	0.000502997	-0.047943	-1.94318e-05	0.000508681	-0.0382005	2	-7.79956e-06	0.00029723	-0.0262408	-8.82595e-06	0.000317774	-0.0277743	-2.38267e-05	0.000412293	-0.0577909	-2.41042e-05	0.000400781	-0.0601431	-1.75988e-05	0.000410423	-0.0428795	2	-7.79956e-06	0.00029723	-0.0262408	-8.82595e-06	0.000317774	-0.0277743	-2.26831e-05	0.000302944	-0.0748755	-2.42533e-05	0.00029359	-0.0826093	-1.68577e-05	0.000316208	-0.0533122
3	-1.11807e-05	0.000380343	-0.0293965	-1.2923e-05	0.000406868	-0.0317622	-3.45956e-05	0.00064061	-0.0540042	-3.24512e-05	0.000613491	-0.0528959	-2.54328e-05	0.000622038	-0.0408863	3	-1.11807e-05	0.000380343	-0.0293965	-1.2923e-05	0.000406868	-0.0317622	-3.31012e-05	0.000503985	-0.065679	-3.27418e-05	0.000488888	-0.0669719	-2.41249e-05	0.00050802	-0.047488	3	-1.11807e-05	0.000380343	-0.0293965	-1.2923e-05	0.000406868	-0.0317622	-3.00639e-05	0.000375593	-0.0800438	-3.22269e-05	0.000363144	-0.088744	-2.30986e-05	0.000397662	-0.0580862
4	-1.3245e-05	0.000448701	-0.0295186	-1.48926e-05	0.000479759	-0.0310417	-4.03222e-05	0.000736976	-0.054713	-3.94675e-05	0.000703955	-0.0560653	-2.59508e-05	0.00071961	-0.0360624	4	-1.3245e-05	0.000448701	-0.0295186	-1.48926e-05	0.000479759	-0.0310417	-3.97959e-05	0.000578496	-0.0687919	-3.99993e-05	0.000560648	-0.0713447	-2.60154e-05	0.000590696	-0.0440418	4	-1.3245e-05	0.000448701	-0.0295186	-1.48926e-05	0.000479759	-0.0310417	-3.59355e-05	0.000436137	-0.0823949	-3.89905e-05	0.000420709	-0.0926781	-2.57733e-05	0.000467117	-0.0551752
5	-1.51005e-05	0.000508701	-0.0296844	-1.661e-05	0.000543977	-0.0305345	-4.92683e-05	0.000819284	-0.0601358	-4.53254e-05	0.000781495	-0.0579983	-2.89438e-05	0.000804159	-0.0359926	5	-1.51005e-05	0.000508701	-0.0296844	-1.661e-05	0.000543977	-0.0305345	-4.70494e-05	0.000646067	-0.0728244	-4.5907e-05	0.000624265	-0.0735377	-3.02932e-05	0.000661966	-0.0457625	5	-1.51005e-05	0.000508701	-0.0296844	-1.661e-05	0.000543977	-0.0305345	-4.18488e-05	0.000489857	-0.0854306	-4.57681e-05	0.000475025	-0.0963489	-2.88556e-05	0.000529859	-0.0544591
6	-1.6091e-05	0.000562389	-0.0286118	-1.70921e-05	0.000601575	-0.0284123	-5.52483e-05	0.000888194	-0.062203	-4.91694e-05	0.000848625	-0.05794	-3.14604e-05	0.000882841	-0.0356354	6	-1.6091e-05	0.000562389	-0.0286118	-1.70921e-05	0.000601575	-0.0284123	-5.2579e-05	0.000706507	-0.0744211	-4.98749e-05	0.000683798	-0.072938	-3.19815e-05	0.000728666	-0.0438904	6	-1.6091e-05	0.000562389	-0.0286118	-1.70921e-05	0.000601575	-0.0284123	-4.67932e-05	0.000537321	-0.087086	-5.04788e-05	0.000522186	-0.0966682	-3.05394e-05	0.000585432	-0.0521656
7	-1.70888e-05	0.000612199	-0.0279138	-1.76697e-05	0.000654765	-0.0269863	-6.03861e-05	0.00095606	-0.0631615	-5.26028e-05	0.000917612	-0.0573257	-3.32581e-05	0.000954491	-0.0348438	7	-1.70888e-05	0.000612199	-0.0279138	-1.76697e-05	0.000654765	-0.0269863	-5.58466e-05	0.00076295	-0.0731983	-5.34373e-05	0.000740301	-0.0721833	-3.35941e-05	0.000791503	-0.0424434	7	-1.70888e-05	0.000612199	-0.0279138	-1.76697e-05	0.000654765	-0.0269863	-5.16245e-05	0.000580604	-0.0889152	-5.38071e-05	0.000566664	-0.0949542	-3.26462e-05	0.000637598	-0.0512018
8	-1.7711e-05	0.000657919	-0.0269197	-1.75294e-05	0.000703803	-0.0249066	-6.38034e-05	0.00101965	-0.0625737	-5.6685e-05	0.000978807	-0.0579124	-3.60177e-05	0.00102004	-0.03531	8	-1.7711e-05	0.000657919	-0.0269197	-1.75294e-05	0.000703803	-0.0249066	-6.05913e-05	0.000814949	-0.0743498	-5.89949e-05	0.000793125	-0.0743828	-3.64987e-05	0.000847262	-0.0430784	8	-1.7711e-05	0.000657919	-0.0269197	-1.75294e-05	0.000703803	-0.0249066	-5.54858e-05	0.000621146	-0.0893281	-5.83509e-05	0.000607881	-0.0959906	-3.47698e-05	0.000684829	-0.0507714
9	-1.82955e-05	0.000701339	-0.0260865	-1.7496e-05	0.000750285	-0.0233191	-6.70945e-05	0.00107812	-0.0622329	-6.0944e-05	0.0010351	-0.0588773	-3.74846e-05	0.00108229	-0.0346347	9	-1.82955e-05	0.000701339	-0.0260865	-1.7496e-05	0.000750285	-0.0233191	-6.42121e-05	0.000865251	-0.0742121	-6.26805e-05	0.000844247	-0.0742443	-3.74217e-05	0.000899772	-0.0415902	9	-1.82955e-05	0.000701339	-0.0260865	-1.7496e-05	0.000750285	-0.0233191	-5.96893e-05	0.000659535	-0.0905021	-6.31196e-05	0.000647915	-0.0974196	-3.70009e-05	0.000731027	-0.050615
10	-1.86762e-05	0.000742692	-0.0251467	-1.70685e-05	0.000794605	-0.0214805	-7.10626e-05	0.00112956	-0.0629119	-6.26159e-05	0.00108625	-0.0576442	-3.65995e-05	0.0011425	-0.0320345	10	-1.86762e-05	0.000742692	-0.0251467	-1.70685e-05	0.000794605	-0.0214805	-6.60378e-05	0.000911591	-0.0724424	-6.55512e-05	0.000887406	-0.0738684	-3.75679e-05	0.000949687	-0.0395582	10	-1.86762e-05	0.000742692	-0.0251467	-1.70685e-05	0.000794605	-0.0214805	-6.18288e-05	0.000698026	-0.0885767	-6.73778e-05	0.000683637	-0.0985579	-3.75773e-05	0.00077422	-0.0485357
11	-1.92789e-05	0.000781416	-0.0246717	-1.71351e-05	0.000836578	-0.0204823	-7.4101e-05	0.00117943	-0.062828	-6.66866e-05	0.00113397	-0.0588081	-3.9026e-05	0.00119921	-0.0325431	11	-1.92789e-05	0.000781416	-0.0246717	-1.71351e-05	0.000836578	-0.0204823	-6.87452e-05	0.000955862	-0.0719195	-6.90475e-05	0.000927956	-0.0744082	-3.82169e-05	0.000999789	-0.038225	11	-1.92789e-05	0.000781416	-0.0246717	-1.71351e-05	0.000836578	-0.0204823	-6.48237e-05	0.00073358	-0.0883662	-7.07737e-05	0.000719194	-0.098407	-4.0146e-05	0.000813682	-0.0493387
12	-1.94992e-05	0.000818018	-0.0238371	-1.66065e-05	0.000875846	-0.0189606	-7.43854e-05	0.00122729	-0.0606095	-6.85148e-05	0.00118356	-0.0578886	-3.89685e-05	0.00125006	-0.0311734	12	-1.94992e-05	0.000818018	-0.0238371	-1.66065e-05	0.000875846	-0.0189606	-6.93816e-05	0.0009972	-0.0695764	-7.10141e-05	0.000969085	-0.0732795	-3.89384e-05	0.00104362	-0.0373109	12	-1.94992e-05	0.000818018	-0.0238371	-1.66065e-05	0.000875846	-0.0189606	-6.60366e-05	0.000767388	-0.0860538	-7.31069e-05	0.000751648	-0.0972622	-4.12493e-05	0.000850245	-0.0485145
13	-1.97345e-05	0.000853386	-0.0231249	-1.63385e-05	0.000913778	-0.0178802	-7.89377e-05	0.00127465	-0.0619289	-7.02139e-05	0.00123091	-0.0570421	-4.02564e-05	0.00129385	-0.0311137	13	-1.97345e-05	0.000853386	-0.0231249	-1.63385e-05	0.000913778	-0.0178802	-7.29261e-05	0.00103715	-0.070314	-7.31338e-05	0.00100878	-0.0724969	-4.0082e-05	0.00108352	-0.0369923	13	-1.97345e-05	0.000853386	-0.0231249	-1.63385e-05	0.000913778	-0.0178802	-6.84527e-05	0.000800565	-0.0855055	-7.63935e-05	0.000784749	-0.0973476	-4.30945e-05	0.000884563	-0.0487184
14	-1.95821e-05	0.000886725	-0.0220836	-1.55462e-05	0.000949899	-0.0163661	-8.30097e-05	0.00132127	-0.0628255	-7.12619e-05	0.00127939	-0.0556997	-3.86866e-05	0.00134333	-0.0287991	14	-1.95821e-05	0.000886725	-0.0220836	-1.55462e-05	0.000949899	-0.0163661	-7.53089e-05	0.0010733	-0.0701657	-7.44039e-05	0.00104713	-0.071055	-3.99342e-05	0.00112604	-0.0354643	14	-1.95821e-05	0.000886725	-0.0220836	-1.55462e-05	0.000949899	-0.0163661	-6.9724e-05	0.000831288	-0.0838746	-7.80518e-05	0.000816697	-0.09557	-4.26034e-05	0.000920421	-0.0462869
15	-1.95788e-05	0.000918741	-0.0213105	-1.52017e-05	0.000984725	-0.0154375	-8.60083e-05	0.00136413	-0.0630501	-7.45453e-05	0.00132524	-0.0562503	-3.59121e-05	0.00139067	-0.0258236	15	-1.95788e-05	0.000918741	-0.0213105	-1.52017e-05	0.000984725	-0.0154375	-7.74569e-05	0.00110833	-0.0698863	-7.75696e-05	0.00108597	-0.071429	-3.9708e-05	0.00116537	-0.0340734	15	-1.95788e-05	0.000918741	-0.0213105	-1.52017e-05	0.000984725	-0.0154375	-7.22615e-05	0.00086147	-0.0838816	-8.09774e-05	0.00084856	-0.0954292	-4.29625e-05	0.000955287	-0.0449734
16	-1.96532e-05	0.000949603	-0.0206962	-1.4724e-05	0.00101872	-0.0144535	-8.86248e-05	0.00140372	-0.0631355	-7.70812e-05	0.00136759	-0.0563627	-3.50344e-05	0.0014398	-0.0243328	16	-1.96532e-05	0.000949603	-0.0206962	-1.4724e-05	0.00101872	-0.0144535	-7.99599e-05	0.00114271	-0.0699742	-8.11368e-05	0.00112159	-0.0723408	-4.03892e-05	0.00120433	-0.0335366	16	-1.96532e-05	0.000949603	-0.0206962	-1.4724e-05	0.00101872	-0.0144535	-7.34099e-05	0.000889569	-0.082523	-8.39932e-05	0.000877773	-0.095689	-4.39314e-05	0.000986017	-0.0445544
17	-2.00021e-05	0.000979542	-0.0204199	-1.47342e-05	0.00105144	-0.0140133	-9.07061e-05	0.00145292	-0.0624301	-8.02491e-05	0.00140775	-0.0570052	-3.6774e-05	0.00148383	-0.0247831	17	-2.00021e-05	0.000979542	-0.0204199	-1.47342e-05	0.00105144	-0.0140133	-8.3603e-05	0.00118051	-0.0708192	-8.44996e-05	0.00115567	-0.0731172	-4.15118e-05	0.00123997	-0.0334779	17	-2.00021e-05	0.000979542	-0.0204199	-1.47342e-05	0.00105144	-0.0140133	-7.68504e-05	0.000919158	-0.0836096	-8.79942e-05	0.000906513	-0.0970688	-4.47809e-05	0.00101648	-0.0440548
18	-2.00793e-05	0.00100869	-0.0199063	-1.43885e-05	0.00108254	-0.0132915	-9.22882e-05	0.00149105	-0.0618948	-8.41217e-05	0.00144628	-0.058164	-3.59957e-05	0.00152574	-0.0235923	18	-2.00793e-05	0.00100869	-0.0199063	-1.43885e-05	0.00108254	-0.0132915	-8.52659e-05	0.00121215	-0.0703427	-8.7403e-05	0.00118543	-0.0737309	-4.02251e-05	0.00127529	-0.031542	18	-2.00793e-05	0.00100869	-0.0199063	-1.43885e-05	0.00108254	-0.0132915	-7.86676e-05	0.000945287	-0.0832209	-9.1159e-05	0.000931887	-0.097822	-4.41441e-05	0.00104809	-0.0421184
19	-2.04146e-05	0.00103619	-0.0197016	-1.45365e-05	0.00111203	-0.013072	-9.53513e-05	0.00152735	-0.0624293	-8.87426e-05	0.00148323	-0.0598306	-3.3385e-05	0.00157388	-0.0212118	19	-2.04146e-05	0.00103619	-0.0197016	-1.45365e-05	0.00111203	-0.013072	-8.84667e-05	0.00124352	-0.0711423	-9.18333e-05	0.00121719	-0.0754472	-4.04018e-05	0.00131344	-0.0307603	19	-2.04146e-05	0.00103619	-0.0197016	-1.45365e-05	0.00111203	-0.013072	-8.1022e-05	0.000971112	-0.0834322	-9.47984e-05	0.000957982	-0.0989564	-4.60058e-05	0.00108034	-0.0425844
20	-2.03056e-05	0.00106206	-0.019119	-1.4121e-05	0.00113938	-0.0123936	-9.90291e-05	0.00156142	-0.0634223	-9.2841e-05	0.00151018	-0.0614766	-3.27576e-05	0.0016158	-0.0202734	20	-2.03056e-05	0.00106206	-0.019119	-1.4121e-05	0.00113938	-0.0123936	-9.08297e-05	0.00127472	-0.0712545	-9.56746e-05	0.00124176	-0.0770477	-4.13349e-05	0.00135095	-0.0305968	20	-2.03056e-05	0.00106206	-0.019119	-1.4121e-05	0.00113938	-0.0123936	-8.35006e-05	0.000997059	-0.0837469	-9.75524e-05	0.000982019	-0.0993386	-4.72149e-05	0.00111055	-0.0425149
21	-2.03193e-05	0.00108696	-0.0186937	-1.3877e-05	0.00116572	-0.0119042	-0.000102326	0.00160189	-0.0638786	-9.83129e-05	0.00154101	-0.0637975	-3.52274e-05	0.00165525	-0.0212822	21	-2.03193e-05	0.00108696	-0.0186937	-1.3877e-05	0.00116572	-0.0119042	-9.29658e-05	0.00130812	-0.0710683	-9.92207e-05	0.00126931	-0.078169	-4.26833e-05	0.00138675	-0.0307794	21	-2.03193e-05	0.00108696	-0.0186937	-1.3877e-05	0.00116572	-0.0119042	-8.64707e-05	0.0010233	-0.0845018	-0.000101903	0.00100584	-0.101311	-4.84048e-05	0.00113922	-0.0424895
22	-2.02883e-05	0.00111045	-0.0182704	-1.3451e-05	0.00119079	-0.0112959	-0.000105055	0.00163977	-0.0640668	-9.94621e-05	0.00157283	-0.0632377	-3.50463e-05	0.00169295	-0.0207014	22	-2.02883e-05	0.00111045	-0.0182704	-1.3451e-05	0.00119079	-0.0112959	-9.588e-05	0.00133953	-0.0715775	-0.000100528	0.00129602	-0.0775669	-4.16876e-05	0.00141788	-0.0294013	22	-2.02883e-05	0.00111045	-0.0182704	-1.3451e-05	0.00119079	-0.0112959	-8.80685e-05	0.00104865	-0.0839829	-0.000103241	0.0010301	-0.100224	-4.87642e-05	0.00116586	-0.0418268
23	-2.04429e-05	0.00113335	-0.0180375	-1.34001e-05	0.00121466	-0.011032	-0.000106431	0.00167119	-0.0636861	-0.000104035	0.00160611	-0.0647749	-3.43376e-05	0.00173097	-0.0198371	23	-2.04429e-05	0.00113335	-0.0180375	-1.34001e-05	0.00121466	-0.011032	-9.77865e-05	0.00137073	-0.0713389	-0.000104021	0.00132479	-0.0785189	-4.26079e-05	0.0014481	-0.0294234	23	-2.04429e-05	0.00113335	-0.0180375	-1.34001e-05	0.00121466	-0.011032	-9.09398e-05	0.00107377	-0.0846918	-0.000106058	0.00105546	-0.100486	-4.93541e-05	0.00119216	-0.0413989
24	-2.01738e-05	0.0011556	-0.0174574	-1.28598e-05	0.00123786	-0.0103887	-0.000107466	0.00170129	-0.0631678	-0.000107059	0.00163904	-0.0653183	-3.26e-05	0.00176355	-0.0184854	24	-2.01738e-05	0.0011556	-0.0174574	-1.28598e-05	0.00123786	-0.0103887	-9.90061e-05	0.00140275	-0.07058	-0.000106247	0.00135281	-0.0785376	-4.235e-05	0.00147604	-0.0286917	24	-2.01738e-05	0.0011556	-0.0174574	-1.28598e-05	0.00123786	-0.0103887	-9.26318e-05	0.0010996	-0.0842412	-0.000108298	0.00107824	-0.10044	-4.94687e-05	0.00121781	-0.0406208
25	-2.00612e-05	0.00117729	-0.0170401	-1.24996e-05	0.00126022	-0.0099186	-0.000109984	0.00173621	-0.0633473	-0.000109632	0.00166999	-0.0656482	-3.20698e-05	0.00179587	-0.0178575	25	-2.00612e-05	0.00117729	-0.0170401	-1.24996e-05	0.00126022	-0.0099186	-0.0001016	0.0014309	-0.0710046	-0.000109001	0.00138079	-0.0789415	-4.40559e-05	0.00150492	-0.0292747	25	-2.00612e-05	0.00117729	-0.0170401	-1.24996e-05	0.00126022	-0.0099186	-9.57462e-05	0.00112575	-0.0850507	-0.000110976	0.00110097	-0.100799	-5.02597e-05	0.00124289	-0.0404376
26	-1.9721e-05	0.00119821	-0.0164587	-1.16075e-05	0.00128135	-0.00905882	-0.000112702	0.00177009	-0.0636703	-0.000110207	0.00170139	-0.0647744	-3.10576e-05	0.00182677	-0.0170014	26	-1.9721e-05	0.00119821	-0.0164587	-1.16075e-05	0.00128135	-0.00905882	-0.000103875	0.00145944	-0.0711748	-0.000110733	0.00140936	-0.0785701	-4.48085e-05	0.00153203	-0.0292478	26	-1.9721e-05	0.00119821	-0.0164587	-1.16075e-05	0.00128135	-0.00905882	-9.69787e-05	0.00115087	-0.0842653	-0.000112656	0.0011228	-0.100334	-5.0811e-05	0.001268	-0.0400719
27	-1.94974e-05	0.00121864	-0.0159993	-1.10745e-05	0.00130196	-0.00850599	-0.000114094	0.00180545	-0.0631941	-0.000112069	0.00173644	-0.0645394	-3.278e-05	0.00185647	-0.0176572	27	-1.94974e-05	0.00121864	-0.0159993	-1.10745e-05	0.00130196	-0.00850599	-0.000105781	0.00148676	-0.0711486	-0.000112835	0.00143787	-0.0784734	-4.58415e-05	0.00155899	-0.0294046	27	-1.94974e-05	0.00121864	-0.0159993	-1.10745e-05	0.00130196	-0.00850599	-9.94751e-05	0.00117563	-0.0846139	-0.000115198	0.00114552	-0.100564	-5.14937e-05	0.00129151	-0.0398711
28	-1.91259e-05	0.00123882	-0.0154388	-1.02734e-05	0.001322	-0.00777111	-0.000114478	0.00184091	-0.0621853	-0.00011352	0.00176884	-0.0641776	-3.39139e-05	0.00188784	-0.0179643	28	-1.91259e-05	0.00123882	-0.0154388	-1.02734e-05	0.001322	-0.00777111	-0.000107155	0.00151435	-0.0707599	-0.00011354	0.00146349	-0.0775818	-4.57312e-05	0.00158638	-0.0288275	28	-1.91259e-05	0.00123882	-0.0154388	-1.02734e-05	0.001322	-0.00777111	-9.9434e-05	0.00119984	-0.0828726	-0.000116321	0.00116831	-0.099563	-5.10701e-05	0.00131463	-0.0388476
29	-1.87813e-05	0.00125862	-0.0149222	-9.6231e-06	0.00134189	-0.00717127	-0.000119151	0.00187291	-0.0636183	-0.000115017	0.0018016	-0.0638418	-3.41449e-05	0.00192068	-0.0177775	29	-1.87813e-05	0.00125862	-0.0149222	-9.6231e-06	0.00134189	-0.00717127	-0.000110981	0.00154131	-0.0720042	-0.000114455	0.00149095	-0.0767665	-4.49836e-05	0.00161613	-0.0278341	29	-1.87813e-05	0.00125862	-0.0149222	-9.6231e-06	0.00134189	-0.00717127	-0.000101558	0.00122369	-0.0829932	-0.000117289	0.00119121	-0.0984625	-5.15911e-05	0.00133943	-0.0385173
30	-1.82585e-05	0.00127859	-0.0142802	-8.61624e-06	0.00136183	-0.00632694	-0.000119823	0.0019091	-0.0627642	-0.000116285	0.00183822	-0.0632598	-3.20702e-05	0.00196036	-0.0163594	30	-1.82585e-05	0.00127859	-0.0142802	-8.61624e-06	0.00136183	-0.00632694	-0.000111892	0.00156772	-0.0713719	-0.000115986	0.00152119	-0.0762466	-4.47876e-05	0.00164844	-0.0271697	30	-1.82585e-05	0.00127859	-0.0142802	-8.61624e-06	0.00136183	-0.00632694	-0.000102405	0.00124513	-0.0822442	-0.000118611	0.00121485	-0.0976342	-5.16052e-05	0.00136449	-0.0378201
31	-1.79512e-05	0.00129831	-0.0138266	-8.01574e-06	0.00138172	-0.00580126	-0.000121873	0.0019462	-0.0626211	-0.000119742	0.00187103	-0.0639982	-3.30817e-05	0.00199482	-0.0165838	31	-1.79512e-05	0.00129831	-0.0138266	-8.01574e-06	0.00138172	-0.00580126	-0.000114554	0.00159387	-0.0718715	-0.000118852	0.00154944	-0.0767065	-4.60342e-05	0.00167772	-0.0274385	31	-1.79512e-05	0.00129831	-0.0138266	-8.01574e-06	0.00138172	-0.00580126	-0.000104256	0.00126687	-0.0822941	-0.00012085	0.00123679	-0.0977125	-5.23653e-05	0.00138691	-0.0377568
32	-1.75473e-05	0.00131773	-0.0133163	-7.24384e-06	0.00140089	-0.00517088	-0.000124865	0.00198103	-0.0630304	-0.000122179	0.00190404	-0.0641684	-3.33771e-05	0.00202773	-0.0164604	32	-1.75473e-05	0.00131773	-0.0133163	-7.24384e-06	0.00140089	-0.00517088	-0.000116916	0.00162164	-0.0720972	-0.000121475	0.00157633	-0.0770617	-4.52021e-05	0.00170857	-0.026456	32	-1.75473e-05	0.00131773	-0.0133163	-7.24384e-06	0.00140089	-0.00517088	-0.000106319	0.00128696	-0.0826127	-0.000122613	0.0012587	-0.0974124	-5.23216e-05	0.00140992	-0.0371096
33	-1.72976e-05	0.00133669	-0.0129406	-6.69489e-06	0.0014194	-0.0047167	-0.000127466	0.0020182	-0.0631585	-0.000124501	0.00193999	-0.064176	-3.35192e-05	0.0020558	-0.0163047	33	-1.72976e-05	0.00133669	-0.0129406	-6.69489e-06	0.0014194	-0.0047167	-0.000119691	0.0016499	-0.0725445	-0.000123335	0.00160483	-0.0768527	-4.47988e-05	0.00173071	-0.0258846	33	-1.72976e-05	0.00133669	-0.0129406	-6.69489e-06	0.0014194	-0.0047167	-0.000108927	0.00130801	-0.0832771	-0.00012458	0.00127989	-0.0973364	-5.25516e-05	0.00143262	-0.0366822
34	-1.67098e-05	0.0013552	-0.0123301	-5.74259e-06	0.00143801	-0.00399345	-0.000128976	0.0020479	-0.0629798	-0.0001254	0.0019704	-0.063642	-3.14126e-05	0.00209499	-0.0149941	34	-1.67098e-05	0.0013552	-0.0123301	-5.74259e-06	0.00143801	-0.00399345	-0.000121425	0.00167553	-0.0724694	-0.000124187	0.00162868	-0.0762501	-4.42714e-05	0.00175845	-0.0251764	34	-1.67098e-05	0.0013552	-0.0123301	-5.74259e-06	0.00143801	-0.00399345	-0.000109925	0.00132713	-0.0828287	-0.000126269	0.00130061	-0.0970846	-5.30548e-05	0.00145601	-0.0364385
35	-1.63515e-05	0.00137333	-0.0119065	-5.19527e-06	0.00145652	-0.00356691	-0.000131393	0.00208263	-0.0630898	-0.000125527	0.00199774	-0.0628345	-3.13027e-05	0.00212991	-0.0146967	35	-1.63515e-05	0.00137333	-0.0119065	-5.19527e-06	0.00145652	-0.00356691	-0.000122607	0.00170256	-0.0720134	-0.000125548	0.00165271	-0.0759654	-4.53066e-05	0.00178705	-0.0253527	35	-1.63515e-05	0.00137333	-0.0119065	-5.19527e-06	0.00145652	-0.00356691	-0.000111912	0.00134783	-0.0830317	-0.000128495	0.00132031	-0.0973213	-5.48229e-05	0.00147961	-0.0370523
36	-1.5938e-05	0.00139127	-0.0114557	-4.5758e-06	0.00147493	-0.00310239	-0.000132231	0.00211555	-0.0625045	-0.00012784	0.00202654	-0.0630829	-3.25746e-05	0.00215867	-0.0150901	36	-1.5938e-05	0.00139127	-0.0114557	-4.5758e-06	0.00147493	-0.00310239	-0.000123513	0.00172957	-0.0714125	-0.000126387	0.00167679	-0.0753745	-4.62707e-05	0.00181151	-0.0255426	36	-1.5938e-05	0.00139127	-0.0114557	-4.5758e-06	0.00147493	-0.00310239	-0.000113397	0.00136946	-0.0828038	-0.00013026	0.00134127	-0.0971166	-5.54611e-05	0.00150119	-0.0369448
37	-1.56949e-05	0.00140878	-0.0111408	-4.30998e-06	0.00149291	-0.00288696	-0.00013452	0.00214912	-0.0625929	-0.000130601	0.00205419	-0.0635779	-3.572e-05	0.00218686	-0.0163339	37	-1.56949e-05	0.00140878	-0.0111408	-4.30998e-06	0.00149291	-0.00288696	-0.000125224	0.0017578	-0.0712392	-0.000129036	0.00170234	-0.075799	-4.78159e-05	0.00183699	-0.0260295	37	-1.56949e-05	0.00140878	-0.0111408	-4.30998e-06	0.00149291	-0.00288696	-0.000115792	0.00139156	-0.0832096	-0.000132539	0.00136017	-0.0974424	-5.71557e-05	0.00152447	-0.0374922
38	-1.508e-05	0.00142584	-0.0105762	-3.51266e-06	0.00150996	-0.00232633	-0.00013495	0.00217777	-0.061967	-0.000133601	0.002081	-0.0642004	-3.72345e-05	0.00221471	-0.0168124	38	-1.508e-05	0.00142584	-0.0105762	-3.51266e-06	0.00150996	-0.00232633	-0.00012622	0.00177909	-0.0709467	-0.000130253	0.00172641	-0.0754472	-4.9535e-05	0.00186384	-0.0265768	38	-1.508e-05	0.00142584	-0.0105762	-3.51266e-06	0.00150996	-0.00232633	-0.000116533	0.00141148	-0.0825608	-0.000134254	0.00137922	-0.097341	-5.77383e-05	0.0015475	-0.0373108
39	-1.45447e-05	0.00144286	-0.0100805	-2.86211e-06	0.0015271	-0.00187421	-0.000135093	0.00220263	-0.0613325	-0.00013437	0.00210724	-0.0637657	-3.78074e-05	0.00224801	-0.0168182	39	-1.45447e-05	0.00144286	-0.0100805	-2.86211e-06	0.0015271	-0.00187421	-0.000127695	0.00180115	-0.0708965	-0.000131955	0.00174847	-0.075469	-4.91468e-05	0.00189134	-0.0259851	39	-1.45447e-05	0.00144286	-0.0100805	-2.86211e-06	0.0015271	-0.00187421	-0.000117957	0.00143237	-0.0823509	-0.00013557	0.00139876	-0.0969215	-5.70092e-05	0.00156976	-0.0363171
40	-1.38592e-05	0.00145958	-0.00949534	-2.02014e-06	0.00154388	-0.00130848	-0.000134229	0.00222959	-0.0602035	-0.000132395	0.00213366	-0.0620505	-3.66751e-05	0.0022782	-0.0160983	40	-1.38592e-05	0.00145958	-0.00949534	-2.02014e-06	0.00154388	-0.00130848	-0.000126106	0.00182768	-0.0689981	-0.00013213	0.00177291	-0.0745271	-4.76751e-05	0.00191789	-0.0248581	40	-1.38592e-05	0.00145958	-0.00949534	-2.02014e-06	0.00154388	-0.00130848	-0.000118601	0.00145149	-0.0817098	-0.000135558	0.00141928	-0.0955117	-5.61244e-05	0.00159212	-0.0352515
41	-1.36096e-05	0.00147604	-0.00922039	-1.75601e-06	0.00156035	-0.0011254	-0.00013565	0.00225856	-0.0600605	-0.000135313	0.00215706	-0.0627305	-3.70217e-05	0.00231034	-0.0160243	41	-1.36096e-05	0.00147604	-0.00922039	-1.75601e-06	0.00156035	-0.0011254	-0.000126904	0.00185143	-0.0685435	-0.000135086	0.00179548	-0.0752367	-4.81688e-05	0.00194135	-0.024812	41	-1.36096e-05	0.00147604	-0.00922039	-1.75601e-06	0.00156035	-0.0011254	-0.000119232	0.00147149	-0.0810282	-0.000137841	0.00144007	-0.0957177	-5.69198e-05	0.00161324	-0.0352829
42	-1.30938e-05	0.00149194	-0.00877639	-1.00583e-06	0.00157652	-0.000638009	-0.000136501	0.00228853	-0.0596457	-0.000137506	0.00218378	-0.0629672	-3.62679e-05	0.00234366	-0.0154749	42	-1.30938e-05	0.00149194	-0.00877639	-1.00583e-06	0.00157652	-0.000638009	-0.000128207	0.00187575	-0.0683493	-0.000137568	0.00181902	-0.0756278	-4.80894e-05	0.00196904	-0.0244227	42	-1.30938e-05	0.00149194	-0.00877639	-1.00583e-06	0.00157652	-0.000638009	-0.000120208	0.00149217	-0.080559	-0.000140325	0.00145927	-0.0961609	-5.77215e-05	0.00163693	-0.035262
43	-1.26089e-05	0.00150764	-0.00836338	-4.26342e-07	0.0015921	-0.000267786	-0.000138671	0.00231265	-0.0599618	-0.000137276	0.0022116	-0.0620708	-3.50314e-05	0.0023773	-0.0147358	43	-1.26089e-05	0.00150764	-0.00836338	-4.26342e-07	0.0015921	-0.000267786	-0.000130534	0.00189741	-0.0687958	-0.000139066	0.00184364	-0.0754303	-4.68772e-05	0.00199684	-0.0234757	43	-1.26089e-05	0.00150764	-0.00836338	-4.26342e-07	0.0015921	-0.000267786	-0.000121704	0.00151075	-0.0805587	-0.000142214	0.00147884	-0.0961657	-5.84341e-05	0.0016597	-0.0352077
44	-1.17729e-05	0.00152252	-0.00773252	7.69806e-07	0.00160681	0.00047909	-0.00014081	0.00233761	-0.0602368	-0.00013839	0.00223778	-0.0618423	-3.63041e-05	0.00240538	-0.0150929	44	-1.17729e-05	0.00152252	-0.00773252	7.69806e-07	0.00160681	0.00047909	-0.000131563	0.00191806	-0.0685916	-0.000140768	0.00186863	-0.0753323	-4.77354e-05	0.002022	-0.023608	44	-1.17729e-05	0.00152252	-0.00773252	7.69806e-07	0.00160681	0.00047909	-0.000122744	0.00153045	-0.0802013	-0.000143594	0.0014994	-0.0957674	-5.91135e-05	0.00168256	-0.0351331
45	-1.12169e-05	0.00153762	-0.00729498	1.65544e-06	0.00162148	0.00102094	-0.000140411	0.0023655	-0.0593579	-0.000140462	0.00226659	-0.0619706	-3.71465e-05	0.00243647	-0.015246	45	-1.12169e-05	0.00153762	-0.00729498	1.65544e-06	0.00162148	0.00102094	-0.000133648	0.00194082	-0.0688614	-0.000144085	0.00189368	-0.0760871	-4.69076e-05	0.00204957	-0.0228865	45	-1.12169e-05	0.00153762	-0.00729498	1.65544e-06	0.00162148	0.00102094	-0.000124316	0.00155011	-0.0801983	-0.000145874	0.0015197	-0.0959892	-5.94719e-05	0.00170558	-0.0348691
46	-1.06143e-05	0.00155286	-0.00683532	2.6647e-06	0.00163564	0.00162914	-0.000141172	0.00238613	-0.0591636	-0.000141129	0.00229299	-0.0615483	-3.38103e-05	0.00246983	-0.0136893	46	-1.06143e-05	0.00155286	-0.00683532	2.6647e-06	0.00163564	0.00162914	-0.000134981	0.00196125	-0.0688241	-0.000145905	0.00191449	-0.0762109	-4.54274e-05	0.0020755	-0.0218874	46	-1.06143e-05	0.00155286	-0.00683532	2.6647e-06	0.00163564	0.00162914	-0.000124339	0.00156927	-0.0792335	-0.000147439	0.0015388	-0.0958142	-5.95722e-05	0.00172767	-0.0344814
47	-1.0059e-05	0.00156741	-0.00641757	3.42061e-06	0.00164884	0.00207456	-0.000148751	0.0024082	-0.0617684	-0.000142114	0.00231817	-0.0613042	-3.58293e-05	0.00249521	-0.0143592	47	-1.0059e-05	0.00156741	-0.00641757	3.42061e-06	0.00164884	0.00207456	-0.000140039	0.00198448	-0.0705673	-0.000146995	0.00193809	-0.0758451	-4.59236e-05	0.00209663	-0.0219035	47	-1.0059e-05	0.00156741	-0.00641757	3.42061e-06	0.00164884	0.00207456	-0.000127456	0.00158966	-0.0801783	-0.000149938	0.00155854	-0.0962041	-5.99267e-05	0.00174934	-0.0342568
48	-9.08888e-06	0.00158136	-0.0057475	4.62838e-06	0.0016615	0.00278566	-0.000152688	0.00242813	-0.0628831	-0.000143271	0.00234225	-0.0611684	-3.50211e-05	0.00252246	-0.0138837	48	-9.08888e-06	0.00158136	-0.0057475	4.62838e-06	0.0016615	0.00278566	-0.00014261	0.00200561	-0.0711054	-0.000147366	0.00195784	-0.0752697	-4.59391e-05	0.00211805	-0.0216893	48	-9.08888e-06	0.00158136	-0.0057475	4.62838e-06	0.0016615	0.00278566	-0.000129073	0.00160895	-0.0802216	-0.000150932	0.0015779	-0.0956535	-5.94643e-05	0.0017696	-0.0336033
49	-8.23916e-06	0.00159576	-0.00516315	5.51092e-06	0.00167482	0.00329046	-0.000154789	0.00245412	-0.0630734	-0.000145699	0.00236435	-0.061623	-3.50474e-05	0.00255277	-0.0137292	49	-8.23916e-06	0.00159576	-0.00516315	5.51092e-06	0.00167482	0.00329046	-0.00014491	0.00202756	-0.0714701	-0.000149518	0.00197903	-0.075551	-4.5545e-05	0.00214286	-0.0212543	49	-8.23916e-06	0.00159576	-0.00516315	5.51092e-06	0.00167482	0.00329046	-0.000131026	0.00162765	-0.0804999	-0.000153197	0.00159566	-0.0960084	-5.87471e-05	0.00179097	-0.0328018
50	-7.01613e-06	0.00161031	-0.004357	6.82832e-06	0.00168829	0.00404451	-0.000155217	0.0024806	-0.0625725	-0.000146571	0.00238994	-0.0613285	-3.61582e-05	0.00258154	-0.0140064	50	-7.01613e-06	0.00161031	-0.004357	6.82832e-06	0.00168829	0.00404451	-0.000146027	0.00204773	-0.0713114	-0.000150492	0.00200171	-0.0751815	-4.72535e-05	0.00216825	-0.0217933	50	-7.01613e-06	0.00161031	-0.004357	6.82832e-06	0.00168829	0.00404451	-0.000132145	0.00164635	-0.0802656	-0.000153966	0.00161418	-0.0953835	-5.93999e-05	0.00181389	-0.0327472
51	-5.91649e-06	0.00162502	-0.00364088	7.87075e-06	0.00170157	0.00462557	-0.000155617	0.00250454	-0.062134	-0.000148936	0.00241921	-0.0615639	-3.73064e-05	0.00260849	-0.014302	51	-5.91649e-06	0.00162502	-0.00364088	7.87075e-06	0.00170157	0.00462557	-0.00014801	0.00206755	-0.071587	-0.000152718	0.00202393	-0.0754561	-4.75915e-05	0.00219309	-0.0217007	51	-5.91649e-06	0.00162502	-0.00364088	7.87075e-06	0.00170157	0.00462557	-0.000133824	0.00166413	-0.080417	-0.00015484	0.00163424	-0.094748	-6.08506e-05	0.00183514	-0.0331585
52	-4.64639e-06	0.00163968	-0.00283371	9.3359e-06	0.0017148	0.0054443	-0.000155819	0.00253212	-0.0615372	-0.000150728	0.00244474	-0.0616542	-3.91731e-05	0.0026375	-0.0148524	52	-4.64639e-06	0.00163968	-0.00283371	9.3359e-06	0.0017148	0.0054443	-0.000149753	0.00208865	-0.0716984	-0.000154585	0.00204515	-0.075586	-4.92438e-05	0.00221748	-0.0222071	52	-4.64639e-06	0.00163968	-0.00283371	9.3359e-06	0.0017148	0.0054443	-0.000135502	0.00168315	-0.0805052	-0.000156759	0.00165451	-0.0947466	-6.16655e-05	0.00185536	-0.0332364
53	-3.71627e-06	0.00165496	-0.00224553	1.04083e-05	0.00172879	0.0060206	-0.000158016	0.002561	-0.0617009	-0.000150489	0.00246945	-0.0609401	-3.72685e-05	0.00266625	-0.0139779	53	-3.71627e-06	0.00165496	-0.00224553	1.04083e-05	0.00172879	0.0060206	-0.000152644	0.00211214	-0.0722698	-0.000155862	0.0020663	-0.0754302	-4.79035e-05	0.00224555	-0.0213327	53	-3.71627e-06	0.00165496	-0.00224553	1.04083e-05	0.00172879	0.0060206	-0.000136899	0.00170213	-0.0804279	-0.000157815	0.00167395	-0.0942769	-6.23821e-05	0.00187801	-0.0332171
54	-2.74849e-06	0.00167036	-0.00164545	1.16482e-05	0.00174328	0.00668177	-0.000159107	0.00259255	-0.0613709	-0.000150259	0.00249771	-0.0601587	-3.50504e-05	0.00269347	-0.0130131	54	-2.74849e-06	0.00167036	-0.00164545	1.16482e-05	0.00174328	0.00668177	-0.000154012	0.00213711	-0.0720656	-0.00015669	0.00208907	-0.0750045	-4.85407e-05	0.00226999	-0.0213837	54	-2.74849e-06	0.00167036	-0.00164545	1.16482e-05	0.00174328	0.00668177	-0.000137994	0.00172083	-0.0801906	-0.00015875	0.00169252	-0.093795	-6.28072e-05	0.00189975	-0.0330608
55	-1.96697e-06	0.00168665	-0.0011662	1.24237e-05	0.00175916	0.0070623	-0.00016089	0.00261801	-0.0614549	-0.000151145	0.00252202	-0.0599302	-3.47208e-05	0.00271705	-0.0127789	55	-1.96697e-06	0.00168665	-0.0011662	1.24237e-05	0.00175916	0.0070623	-0.000156842	0.00215697	-0.0727142	-0.000157714	0.00210933	-0.0747695	-4.70734e-05	0.00229154	-0.0205423	55	-1.96697e-06	0.00168665	-0.0011662	1.24237e-05	0.00175916	0.0070623	-0.000140261	0.0017407	-0.0805774	-0.000160745	0.00171094	-0.0939515	-6.28562e-05	0.0019209	-0.0327222
56	-1.15509e-06	0.0017032	-0.00067819	1.3413e-05	0.00177544	0.00755472	-0.000162468	0.00264543	-0.0614146	-0.000153698	0.0025506	-0.0602594	-3.59545e-05	0.0027489	-0.0130796	56	-1.15509e-06	0.0017032	-0.00067819	1.3413e-05	0.00177544	0.00755472	-0.000158075	0.00217877	-0.0725523	-0.000158313	0.0021332	-0.0742138	-4.78998e-05	0.00231809	-0.0206635	56	-1.15509e-06	0.0017032	-0.00067819	1.3413e-05	0.00177544	0.00755472	-0.000141186	0.00175959	-0.0802381	-0.000162506	0.00172934	-0.0939703	-6.34435e-05	0.00194147	-0.032678
57	-5.06507e-07	0.00171955	-0.000294559	1.40117e-05	0.00179141	0.00782159	-0.000165814	0.00267164	-0.0620645	-0.000156088	0.00257785	-0.0605496	-3.73566e-05	0.00278228	-0.0134266	57	-5.06507e-07	0.00171955	-0.000294559	1.40117e-05	0.00179141	0.00782159	-0.000160528	0.0022023	-0.0728912	-0.00016084	0.00215839	-0.0745186	-4.96463e-05	0.00234046	-0.0212122	57	-5.06507e-07	0.00171955	-0.000294559	1.40117e-05	0.00179141	0.00782159	-0.000142947	0.00178007	-0.0803043	-0.000164811	0.00175016	-0.0941691	-6.45537e-05	0.00196438	-0.0328621
58	3.49657e-07	0.00173519	0.00020151	1.50287e-05	0.00180625	0.00832039	-0.000166207	0.00269287	-0.0617212	-0.000158025	0.00260394	-0.0606867	-3.82052e-05	0.00280819	-0.0136049	58	3.49657e-07	0.00173519	0.00020151	1.50287e-05	0.00180625	0.00832039	-0.000161283	0.00222211	-0.0725811	-0.00016226	0.00218327	-0.0743196	-4.94344e-05	0.00236309	-0.0209193	58	3.49657e-07	0.00173519	0.00020151	1.50287e-05	0.00180625	0.00832039	-0.000143889	0.00179919	-0.0799746	-0.000166656	0.00176985	-0.094164	-6.46784e-05	0.00198532	-0.0325783
59	1.25956e-06	0.00175065	0.00071948	1.60917e-05	0.00182065	0.00883843	-0.000167124	0.00272263	-0.0613834	-0.000160196	0.00263031	-0.0609038	-3.924e-05	0.00283765	-0.0138283	59	1.25956e-06	0.00175065	0.00071948	1.60917e-05	0.00182065	0.00883843	-0.000162521	0.00224767	-0.0723066	-0.000164078	0.00220663	-0.0743569	-5.00055e-05	0.00238796	-0.0209407	59	1.25956e-06	0.00175065	0.00071948	1.60917e-05	0.00182065	0.00883843	-0.000145916	0.00181832	-0.0802479	-0.000169455	0.0017887	-0.0947367	-6.57371e-05	0.0020064	-0.0327637
60	2.45652e-06	0.00176562	0.0013913	1.76716e-05	0.00183444	0.00963327	-0.000166804	0.00275017	-0.0606522	-0.000161833	0.00265123	-0.0610407	-3.83495e-05	0.00286479	-0.0133865	60	2.45652e-06	0.00176562	0.0013913	1.76716e-05	0.00183444	0.00963327	-0.000163268	0.00227192	-0.0718633	-0.00016645	0.00222638	-0.0747627	-4.88088e-05	0.0024121	-0.020235	60	2.45652e-06	0.00176562	0.0013913	1.76716e-05	0.00183444	0.00963327	-0.000146278	0.00183564	-0.079688	-0.000170644	0.00180576	-0.0945002	-6.4615e-05	0.00202666	-0.0318825
61	3.53839e-06	0.00178029	0.00198754	1.8971e-05	0.00184766	0.0102675	-0.000168417	0.00277555	-0.0606787	-0.000165174	0.0026715	-0.0618283	-3.94943e-05	0.00289545	-0.0136401	61	3.53839e-06	0.00178029	0.00198754	1.8971e-05	0.00184766	0.0102675	-0.000163604	0.00229237	-0.0713692	-0.000168139	0.00224743	-0.0748141	-4.97123e-05	0.00243571	-0.0204098	61	3.53839e-06	0.00178029	0.00198754	1.8971e-05	0.00184766	0.0102675	-0.000147373	0.00185264	-0.0795472	-0.000172652	0.00182389	-0.0946613	-6.53998e-05	0.00204592	-0.031966
62	5.08954e-06	0.00179496	0.00283545	2.06637e-05	0.00186138	0.0111013	-0.000168805	0.00280023	-0.0602827	-0.000166572	0.00269178	-0.0618819	-3.7888e-05	0.00291885	-0.0129804	62	5.08954e-06	0.00179496	0.00283545	2.06637e-05	0.00186138	0.0111013	-0.000163488	0.00231219	-0.0707069	-0.000170009	0.00226577	-0.0750339	-4.92329e-05	0.00245808	-0.020029	62	5.08954e-06	0.00179496	0.00283545	2.06637e-05	0.00186138	0.0111013	-0.00014803	0.00187036	-0.0791453	-0.000173623	0.0018413	-0.0942936	-6.54309e-05	0.00206554	-0.0316774
63	6.47554e-06	0.00180972	0.00357819	2.22728e-05	0.00187498	0.011879	-0.000170369	0.00282413	-0.0603264	-0.000167211	0.00271517	-0.0615838	-3.96592e-05	0.00293962	-0.0134913	63	6.47554e-06	0.00180972	0.00357819	2.22728e-05	0.00187498	0.011879	-0.000165314	0.00233525	-0.0707909	-0.000172014	0.00228651	-0.07523	-4.93201e-05	0.00247815	-0.019902	63	6.47554e-06	0.00180972	0.00357819	2.22728e-05	0.00187498	0.011879	-0.000148607	0.00188832	-0.0786982	-0.000175183	0.00185873	-0.0942489	-6.56507e-05	0.00208417	-0.0314997
64	8.00842e-06	0.00182498	0.00438823	2.40126e-05	0.00188906	0.0127114	-0.000171364	0.00284551	-0.0602226	-0.000168725	0.00273818	-0.0616196	-4.00606e-05	0.00296233	-0.0135233	64	8.00842e-06	0.00182498	0.00438823	2.40126e-05	0.00188906	0.0127114	-0.000167205	0.00235549	-0.0709855	-0.000173779	0.00230641	-0.0753459	-4.92939e-05	0.00249983	-0.0197189	64	8.00842e-06	0.00182498	0.00438823	2.40126e-05	0.00188906	0.0127114	-0.000150489	0.00190368	-0.0790519	-0.000176005	0.00187568	-0.0938354	-6.55913e-05	0.00210363	-0.0311801
65	9.73984e-06	0.0018406	0.00529167	2.5708e-05	0.00190372	0.0135041	-0.000175099	0.0028762	-0.0608785	-0.000169251	0.00276342	-0.061247	-4.21051e-05	0.00298739	-0.0140943	65	9.73984e-06	0.0018406	0.00529167	2.5708e-05	0.00190372	0.0135041	-0.000169582	0.00237681	-0.0713483	-0.000174288	0.00232504	-0.0749611	-5.07495e-05	0.00252023	-0.0201368	65	9.73984e-06	0.0018406	0.00529167	2.5708e-05	0.00190372	0.0135041	-0.000152687	0.00191904	-0.0795644	-0.000176405	0.00189269	-0.0932029	-6.66915e-05	0.00212177	-0.0314321
66	1.1585e-05	0.00185612	0.0062415	2.76988e-05	0.0019186	0.014437	-0.000175195	0.00290742	-0.060258	-0.000170952	0.00278771	-0.0613234	-4.20008e-05	0.00301269	-0.0139413	66	1.1585e-05	0.00185612	0.0062415	2.76988e-05	0.0019186	0.014437	-0.000171197	0.00239754	-0.0714052	-0.000176324	0.00234549	-0.0751759	-5.02353e-05	0.00254094	-0.0197704	66	1.1585e-05	0.00185612	0.0062415	2.76988e-05	0.0019186	0.014437	-0.000154581	0.00193714	-0.079799	-0.00017747	0.00190982	-0.0929249	-6.69369e-05	0.00214009	-0.0312775
67	1.31925e-05	0.00187229	0.00704621	2.92114e-05	0.00193372	0.0151063	-0.000178101	0.00292556	-0.0608777	-0.000172816	0.00281055	-0.0614883	-4.54672e-05	0.00303835	-0.0149644	67	1.31925e-05	0.00187229	0.00704621	2.92114e-05	0.00193372	0.0151063	-0.00017423	0.00241365	-0.0721851	-0.00017822	0.00236584	-0.0753309	-5.12791e-05	0.00256317	-0.0200062	67	1.31925e-05	0.00187229	0.00704621	2.92114e-05	0.00193372	0.0151063	-0.000156006	0.00195401	-0.0798388	-0.00017926	0.0019283	-0.0929631	-6.82255e-05	0.00215789	-0.0316167
68	1.49465e-05	0.00188873	0.00791354	3.09541e-05	0.00194919	0.0158805	-0.00017927	0.00294501	-0.0608722	-0.000176112	0.00283524	-0.0621153	-4.58569e-05	0.00306449	-0.0149639	68	1.49465e-05	0.00188873	0.00791354	3.09541e-05	0.00194919	0.0158805	-0.000175433	0.00243322	-0.0720991	-0.000179781	0.00238729	-0.0753078	-5.1411e-05	0.00258544	-0.0198848	68	1.49465e-05	0.00188873	0.00791354	3.09541e-05	0.00194919	0.0158805	-0.000156486	0.00197007	-0.0794316	-0.000181002	0.00194767	-0.0929326	-6.87116e-05	0.00217734	-0.0315576
69	1.66532e-05	0.0019056	0.00873912	3.2572e-05	0.001965	0.0165761	-0.000180632	0.00296187	-0.0609856	-0.00017836	0.00286049	-0.0623528	-4.59879e-05	0.00308436	-0.01491	69	1.66532e-05	0.0019056	0.00873912	3.2572e-05	0.001965	0.0165761	-0.000176368	0.00245226	-0.0719207	-0.000181527	0.00240892	-0.0753564	-5.03124e-05	0.00260617	-0.0193051	69	1.66532e-05	0.0019056	0.00873912	3.2572e-05	0.001965	0.0165761	-0.00015749	0.00198754	-0.0792387	-0.000181969	0.00196674	-0.0925233	-6.90279e-05	0.00219611	-0.0314319
70	1.8653e-05	0.00192201	0.00970491	3.45093e-05	0.0019807	0.0174228	-0.000178498	0.00298488	-0.0598007	-0.000180434	0.00288555	-0.0625302	-4.29697e-05	0.00310713	-0.0138294	70	1.8653e-05	0.00192201	0.00970491	3.45093e-05	0.0019807	0.0174228	-0.000175502	0.00247257	-0.0709795	-0.000181658	0.00242966	-0.0747666	-4.88809e-05	0.0026268	-0.0186086	70	1.8653e-05	0.00192201	0.00970491	3.45093e-05	0.0019807	0.0174228	-0.000157915	0.00200486	-0.0787659	-0.00018203	0.00198512	-0.0916975	-6.85396e-05	0.00221422	-0.0309543
71	2.06157e-05	0.00193838	0.0106355	3.62922e-05	0.00199631	0.0181796	-0.000181349	0.00300592	-0.0603307	-0.000182571	0.00290902	-0.0627604	-4.10286e-05	0.00312903	-0.0131122	71	2.06157e-05	0.00193838	0.0106355	3.62922e-05	0.00199631	0.0181796	-0.000175321	0.00249132	-0.0703725	-0.000182236	0.00245046	-0.0743683	-4.76333e-05	0.00264658	-0.017998	71	2.06157e-05	0.00193838	0.0106355	3.62922e-05	0.00199631	0.0181796	-0.0001589	0.00202176	-0.078595	-0.000181744	0.00200308	-0.090732	-6.82436e-05	0.00223174	-0.0305787
72	2.27083e-05	0.00195398	0.0116216	3.84699e-05	0.00201126	0.0191272	-0.000182749	0.00302523	-0.0604083	-0.000183573	0.00293199	-0.0626103	-3.93369e-05	0.00315355	-0.0124739	72	2.27083e-05	0.00195398	0.0116216	3.84699e-05	0.00201126	0.0191272	-0.00017578	0.00251189	-0.0699792	-0.000182333	0.00247163	-0.0737703	-4.68599e-05	0.00267035	-0.0175482	72	2.27083e-05	0.00195398	0.0116216	3.84699e-05	0.00201126	0.0191272	-0.000159434	0.00203748	-0.0782507	-0.000181818	0.00202063	-0.0899811	-6.81231e-05	0.0022504	-0.0302716
73	2.44451e-05	0.00196919	0.0124137	4.02869e-05	0.00202524	0.0198924	-0.000184974	0.00304779	-0.0606911	-0.000186046	0.00295853	-0.0628848	-3.74789e-05	0.00317448	-0.0118063	73	2.44451e-05	0.00196919	0.0124137	4.02869e-05	0.00202524	0.0198924	-0.00017782	0.00252871	-0.0703204	-0.000181858	0.00249239	-0.0729653	-4.70758e-05	0.00269221	-0.0174859	73	2.44451e-05	0.00196919	0.0124137	4.02869e-05	0.00202524	0.0198924	-0.000161749	0.00205364	-0.078762	-0.000182576	0.00203805	-0.0895834	-6.77425e-05	0.00226963	-0.0298474
74	2.59772e-05	0.0019841	0.0130926	4.20143e-05	0.00203919	0.0206034	-0.000186155	0.00307201	-0.0605971	-0.000187549	0.00298354	-0.0628612	-3.73562e-05	0.00319913	-0.011677	74	2.59772e-05	0.0019841	0.0130926	4.20143e-05	0.00203919	0.0206034	-0.000178729	0.00254835	-0.0701352	-0.000182945	0.00250998	-0.0728871	-4.66647e-05	0.00271201	-0.0172067	74	2.59772e-05	0.0019841	0.0130926	4.20143e-05	0.00203919	0.0206034	-0.000161627	0.00206868	-0.0781304	-0.000182546	0.00205478	-0.0888397	-6.71147e-05	0.00228771	-0.029337
75	2.73644e-05	0.00199918	0.0136878	4.35505e-05	0.00205368	0.0212061	-0.000187429	0.0030967	-0.0605254	-0.000190576	0.00300588	-0.0634011	-3.63761e-05	0.00322268	-0.0112875	75	2.73644e-05	0.00199918	0.0136878	4.35505e-05	0.00205368	0.0212061	-0.00017932	0.00256955	-0.0697865	-0.000184	0.00253155	-0.072683	-4.58781e-05	0.0027345	-0.0167775	75	2.73644e-05	0.00199918	0.0136878	4.35505e-05	0.00205368	0.0212061	-0.00016137	0.00208515	-0.0773898	-0.000183546	0.00207146	-0.0886071	-6.67976e-05	0.002305	-0.0289794
76	2.906e-05	0.00201416	0.0144278	4.52624e-05	0.00206789	0.0218882	-0.000187063	0.00311385	-0.0600745	-0.000191871	0.00302383	-0.0634529	-3.64522e-05	0.003246	-0.0112299	76	2.906e-05	0.00201416	0.0144278	4.52624e-05	0.00206789	0.0218882	-0.000180196	0.00258459	-0.0697193	-0.000185244	0.00254836	-0.0726915	-4.48412e-05	0.00275387	-0.0162829	76	2.906e-05	0.00201416	0.0144278	4.52624e-05	0.00206789	0.0218882	-0.000161151	0.00210046	-0.076722	-0.000183247	0.00208757	-0.0877797	-6.65917e-05	0.0023237	-0.0286576
77	3.05616e-05	0.00202925	0.0150605	4.65301e-05	0.00208213	0.0223474	-0.000190535	0.00313341	-0.0608074	-0.0001945	0.00304557	-0.0638633	-3.57661e-05	0.00326851	-0.0109426	77	3.05616e-05	0.00202925	0.0150605	4.65301e-05	0.00208213	0.0223474	-0.000181856	0.0026026	-0.0698749	-0.000187485	0.00256566	-0.0730747	-4.43777e-05	0.00277547	-0.0159893	77	3.05616e-05	0.00202925	0.0150605	4.65301e-05	0.00208213	0.0223474	-0.00016195	0.00211429	-0.0765977	-0.000182989	0.00210363	-0.0869872	-6.63045e-05	0.00234109	-0.028322
78	3.21201e-05	0.00204424	0.0157125	4.78218e-05	0.00209609	0.0228148	-0.000192637	0.00314838	-0.0611861	-0.000196418	0.00306432	-0.0640983	-3.79854e-05	0.00329002	-0.0115456	78	3.21201e-05	0.00204424	0.0157125	4.78218e-05	0.00209609	0.0228148	-0.000182692	0.00262144	-0.0696914	-0.000189081	0.00258007	-0.0732849	-4.53903e-05	0.00279498	-0.0162399	78	3.21201e-05	0.00204424	0.0157125	4.78218e-05	0.00209609	0.0228148	-0.000162274	0.00212818	-0.0762504	-0.000182658	0.00211895	-0.0862022	-6.68682e-05	0.00235874	-0.0283491
79	3.36273e-05	0.0020593	0.0163295	4.89943e-05	0.00211047	0.0232149	-0.00019519	0.00316699	-0.0616327	-0.00019723	0.00308336	-0.063966	-4.08751e-05	0.00331341	-0.0123362	79	3.36273e-05	0.0020593	0.0163295	4.89943e-05	0.00211047	0.0232149	-0.000184412	0.00264007	-0.0698512	-0.000189778	0.00259875	-0.0730268	-4.62786e-05	0.00281404	-0.0164456	79	3.36273e-05	0.0020593	0.0163295	4.89943e-05	0.00211047	0.0232149	-0.00016286	0.00214164	-0.0760448	-0.000184082	0.00213339	-0.0862861	-6.69828e-05	0.00237712	-0.0281782
80	3.53218e-05	0.00207455	0.0170263	5.03985e-05	0.00212468	0.0237205	-0.000196007	0.00318726	-0.0614971	-0.000196469	0.00310087	-0.0633592	-3.91672e-05	0.00333408	-0.0117475	80	3.53218e-05	0.00207455	0.0170263	5.03985e-05	0.00212468	0.0237205	-0.000185518	0.00265649	-0.0698356	-0.000189228	0.00261451	-0.0723758	-4.48988e-05	0.00282838	-0.0158744	80	3.53218e-05	0.00207455	0.0170263	5.03985e-05	0.00212468	0.0237205	-0.000163357	0.00215634	-0.0757567	-0.000184669	0.00214842	-0.0859556	-6.58694e-05	0.00239265	-0.0275299
81	3.7009e-05	0.0020898	0.0177094	5.16987e-05	0.00213914	0.024168	-0.000195349	0.00320901	-0.0608749	-0.000195869	0.00311928	-0.0627931	-4.06403e-05	0.00336206	-0.0120879	81	3.7009e-05	0.0020898	0.0177094	5.16987e-05	0.00213914	0.024168	-0.00018559	0.00267335	-0.0694222	-0.000189247	0.00263077	-0.0719358	-4.61049e-05	0.00284918	-0.0161818	81	3.7009e-05	0.0020898	0.0177094	5.16987e-05	0.00213914	0.024168	-0.000163555	0.00217039	-0.0753575	-0.000184964	0.00216561	-0.0854097	-6.71412e-05	0.00240823	-0.0278799
82	3.86885e-05	0.00210448	0.0183839	5.32056e-05	0.0021534	0.0247077	-0.000196139	0.00322797	-0.0607623	-0.000197163	0.00314081	-0.0627746	-4.19216e-05	0.00338714	-0.0123767	82	3.86885e-05	0.00210448	0.0183839	5.32056e-05	0.0021534	0.0247077	-0.000187979	0.00268831	-0.0699247	-0.000189704	0.00264973	-0.0715937	-4.70392e-05	0.00287047	-0.0163873	82	3.86885e-05	0.00210448	0.0183839	5.32056e-05	0.0021534	0.0247077	-0.000164477	0.0021854	-0.075262	-0.000184592	0.00218291	-0.0845622	-6.7713e-05	0.0024277	-0.0278919
83	4.02127e-05	0.00211894	0.0189778	5.44179e-05	0.00216798	0.0251007	-0.000199169	0.00324434	-0.0613897	-0.000198065	0.00315713	-0.0627357	-4.07296e-05	0.00341519	-0.011926	83	4.02127e-05	0.00211894	0.0189778	5.44179e-05	0.00216798	0.0251007	-0.000189975	0.00270332	-0.0702745	-0.000190637	0.00266415	-0.0715566	-4.66257e-05	0.00289371	-0.0161128	83	4.02127e-05	0.00211894	0.0189778	5.44179e-05	0.00216798	0.0251007	-0.000165557	0.00220018	-0.0752469	-0.00018531	0.0021989	-0.0842739	-6.70301e-05	0.00244601	-0.0274039
84	4.1711e-05	0.00213308	0.0195544	5.59728e-05	0.00218249	0.0256464	-0.000199307	0.00326398	-0.0610627	-0.000199324	0.0031721	-0.0628366	-3.99888e-05	0.00343651	-0.0116365	84	4.1711e-05	0.00213308	0.0195544	5.59728e-05	0.00218249	0.0256464	-0.000190877	0.00271906	-0.0701993	-0.000190684	0.00267745	-0.0712186	-4.40995e-05	0.00291487	-0.0151292	84	4.1711e-05	0.00213308	0.0195544	5.59728e-05	0.00218249	0.0256464	-0.000166209	0.00221424	-0.0750637	-0.00018471	0.00221379	-0.083436	-6.51282e-05	0.00246322	-0.0264403
85	4.32833e-05	0.00214694	0.0201605	5.74399e-05	0.00219618	0.0261545	-0.000198746	0.00328228	-0.0605511	-0.000201506	0.00318836	-0.0632006	-3.91417e-05	0.00345947	-0.0113144	85	4.32833e-05	0.00214694	0.0201605	5.74399e-05	0.00219618	0.0261545	-0.000189877	0.00273288	-0.0694787	-0.00019176	0.00269567	-0.0711362	-4.36453e-05	0.00293404	-0.0148755	85	4.32833e-05	0.00214694	0.0201605	5.74399e-05	0.00219618	0.0261545	-0.00016587	0.00222625	-0.0745067	-0.000184472	0.00223022	-0.0827148	-6.38939e-05	0.00248117	-0.0257515
86	4.51941e-05	0.00216037	0.0209196	5.92467e-05	0.00220936	0.0268162	-0.000199113	0.0033019	-0.0603024	-0.000201529	0.00320514	-0.0628766	-3.91545e-05	0.00348163	-0.011246	86	4.51941e-05	0.00216037	0.0209196	5.92467e-05	0.00220936	0.0268162	-0.000191452	0.00274891	-0.0696467	-0.000191345	0.00271005	-0.0706058	-4.3978e-05	0.00295312	-0.014892	86	4.51941e-05	0.00216037	0.0209196	5.92467e-05	0.00220936	0.0268162	-0.000166512	0.00223964	-0.0743476	-0.000184588	0.00224397	-0.0822596	-6.39288e-05	0.00249732	-0.0255989
87	4.6939e-05	0.00217324	0.0215986	6.08507e-05	0.00222214	0.0273838	-0.000199319	0.0033217	-0.0600052	-0.000204854	0.00322549	-0.0635108	-3.58198e-05	0.00350142	-0.0102301	87	4.6939e-05	0.00217324	0.0215986	6.08507e-05	0.00222214	0.0273838	-0.000192267	0.00276566	-0.0695194	-0.00019385	0.0027251	-0.071135	-4.24809e-05	0.00297015	-0.0143026	87	4.6939e-05	0.00217324	0.0215986	6.08507e-05	0.00222214	0.0273838	-0.000167617	0.00225317	-0.0743917	-0.000185267	0.00225754	-0.0820658	-6.3142e-05	0.00251334	-0.0251228
88	4.87949e-05	0.00218629	0.0223186	6.26931e-05	0.00223513	0.028049	-0.000199476	0.00333878	-0.0597452	-0.000204163	0.0032443	-0.0629298	-3.56857e-05	0.00352425	-0.0101258	88	4.87949e-05	0.00218629	0.0223186	6.26931e-05	0.00223513	0.028049	-0.000192185	0.00278009	-0.0691291	-0.000194438	0.00274376	-0.0708656	-4.26131e-05	0.00298953	-0.0142541	88	4.87949e-05	0.00218629	0.0223186	6.26931e-05	0.00223513	0.028049	-0.000166692	0.00226626	-0.0735538	-0.000184534	0.0022722	-0.0812138	-6.24908e-05	0.00252997	-0.0247002
89	5.08198e-05	0.00219948	0.0231054	6.44976e-05	0.00224863	0.0286831	-0.000200765	0.00335803	-0.0597866	-0.00020372	0.00326483	-0.0623983	-3.54079e-05	0.00355188	-0.00996876	89	5.08198e-05	0.00219948	0.0231054	6.44976e-05	0.00224863	0.0286831	-0.000192473	0.00279569	-0.0688462	-0.000195426	0.00276023	-0.0708008	-4.23471e-05	0.00301106	-0.0140639	89	5.08198e-05	0.00219948	0.0231054	6.44976e-05	0.00224863	0.0286831	-0.000166751	0.00228041	-0.0731231	-0.000186105	0.00228779	-0.0813468	-6.16523e-05	0.00254807	-0.0241957
90	5.33123e-05	0.00221255	0.0240954	6.68451e-05	0.00226186	0.0295532	-0.00020089	0.00338059	-0.0594247	-0.000203317	0.00329175	-0.0617657	-3.23296e-05	0.00357632	-0.00903989	90	5.33123e-05	0.00221255	0.0240954	6.68451e-05	0.00226186	0.0295532	-0.00019284	0.00281301	-0.0685527	-0.000194506	0.00277966	-0.0699746	-4.06934e-05	0.00303069	-0.0134271	90	5.33123e-05	0.00221255	0.0240954	6.68451e-05	0.00226186	0.0295532	-0.000166561	0.00229607	-0.0725419	-0.000186667	0.0023025	-0.0810715	-6.02909e-05	0.0025653	-0.0235025
91	5.58647e-05	0.00222543	0.0251029	6.90556e-05	0.00227504	0.0303536	-0.000202196	0.00340414	-0.059397	-0.00020047	0.00331154	-0.0605368	-3.12854e-05	0.00359814	-0.00869488	91	5.58647e-05	0.00222543	0.0251029	6.90556e-05	0.00227504	0.0303536	-0.000194892	0.00283159	-0.068828	-0.000193546	0.00279832	-0.0691649	-3.89909e-05	0.00305007	-0.0127836	91	5.58647e-05	0.00222543	0.0251029	6.90556e-05	0.00227504	0.0303536	-0.000167656	0.00231196	-0.0725167	-0.00018721	0.00231629	-0.0808231	-5.91063e-05	0.00258165	-0.0228948
92	5.86469e-05	0.00223833	0.0262012	7.16164e-05	0.00228775	0.0313042	-0.000200943	0.00342922	-0.0585974	-0.000199257	0.0033303	-0.0598317	-3.0258e-05	0.00362178	-0.00835446	92	5.86469e-05	0.00223833	0.0262012	7.16164e-05	0.00228775	0.0313042	-0.000193774	0.00285072	-0.0679737	-0.000192819	0.00281732	-0.0684407	-3.78103e-05	0.00307092	-0.0123124	92	5.86469e-05	0.00223833	0.0262012	7.16164e-05	0.00228775	0.0313042	-0.000166813	0.00232623	-0.0717095	-0.000186925	0.00233148	-0.0801741	-5.72836e-05	0.00259749	-0.0220534
93	6.13134e-05	0.00225089	0.0272396	7.39965e-05	0.00229997	0.0321727	-0.000201122	0.00345031	-0.0582909	-0.000199166	0.00334933	-0.0594643	-3.01651e-05	0.00364267	-0.00828104	93	6.13134e-05	0.00225089	0.0272396	7.39965e-05	0.00229997	0.0321727	-0.000193323	0.00286556	-0.0674641	-0.000192052	0.00283369	-0.0677744	-3.75563e-05	0.00308809	-0.0121617	93	6.13134e-05	0.00225089	0.0272396	7.39965e-05	0.00229997	0.0321727	-0.000166558	0.00234039	-0.0711669	-0.000187583	0.0023462	-0.0799519	-5.69158e-05	0.00261295	-0.0217822
94	6.39249e-05	0.00226335	0.0282435	7.67438e-05	0.00231247	0.033187	-0.000201797	0.00347062	-0.0581445	-0.000200614	0.00337119	-0.0595084	-3.0301e-05	0.00366009	-0.00827877	94	6.39249e-05	0.00226335	0.0282435	7.67438e-05	0.00231247	0.033187	-0.000193896	0.0028829	-0.0672573	-0.000192832	0.00284966	-0.0676685	-3.71656e-05	0.00310399	-0.0119735	94	6.39249e-05	0.00226335	0.0282435	7.67438e-05	0.00231247	0.033187	-0.000167129	0.0023553	-0.0709585	-0.000187697	0.00236062	-0.0795115	-5.66859e-05	0.00262905	-0.0215614
95	6.63682e-05	0.00227595	0.0291606	7.92936e-05	0.00232522	0.0341016	-0.000200494	0.00349349	-0.0573909	-0.000200049	0.00338901	-0.0590287	-3.00467e-05	0.00367831	-0.0081686	95	6.63682e-05	0.00227595	0.0291606	7.92936e-05	0.00232522	0.0341016	-0.000193166	0.00290019	-0.0666047	-0.000192645	0.00286486	-0.067244	-3.75181e-05	0.00312092	-0.0120215	95	6.63682e-05	0.00227595	0.0291606	7.92936e-05	0.00232522	0.0341016	-0.000167458	0.00237044	-0.0706444	-0.000187352	0.00237498	-0.0788856	-5.70247e-05	0.00264357	-0.0215711
96	6.88212e-05	0.00228862	0.0300711	8.21435e-05	0.00233833	0.0351291	-0.000200624	0.00351416	-0.0570903	-0.000199028	0.00340576	-0.0584387	-3.01664e-05	0.00370145	-0.00814989	96	6.88212e-05	0.00228862	0.0300711	8.21435e-05	0.00233833	0.0351291	-0.000193854	0.00291735	-0.0664488	-0.000191043	0.00288305	-0.0662643	-3.80086e-05	0.00314043	-0.012103	96	6.88212e-05	0.00228862	0.0300711	8.21435e-05	0.00233833	0.0351291	-0.000166685	0.00238548	-0.0698747	-0.000186778	0.00239052	-0.0781327	-5.65553e-05	0.00265895	-0.0212698
97	7.07864e-05	0.00230239	0.0307447	8.4215e-05	0.00235277	0.0357939	-0.000200646	0.00353426	-0.0567718	-0.000198073	0.00342906	-0.0577631	-3.13042e-05	0.00372239	-0.00840971	97	7.07864e-05	0.00230239	0.0307447	8.4215e-05	0.00235277	0.0357939	-0.000194298	0.00293399	-0.0662231	-0.000190224	0.00290141	-0.0655626	-3.80054e-05	0.00316015	-0.0120265	97	7.07864e-05	0.00230239	0.0307447	8.4215e-05	0.00235277	0.0357939	-0.000167051	0.00239965	-0.0696146	-0.000186065	0.00240417	-0.0773923	-5.66276e-05	0.00267453	-0.0211729
98	7.2839e-05	0.00231617	0.031448	8.64521e-05	0.00236795	0.0365092	-0.000201722	0.0035561	-0.0567257	-0.000199713	0.00345	-0.0578877	-3.21039e-05	0.00374133	-0.00858088	98	7.2839e-05	0.00231617	0.031448	8.64521e-05	0.00236795	0.0365092	-0.000194053	0.00295276	-0.0657193	-0.000189862	0.00291695	-0.065089	-3.86047e-05	0.00317786	-0.012148	98	7.2839e-05	0.00231617	0.031448	8.64521e-05	0.00236795	0.0365092	-0.000166606	0.00241361	-0.0690276	-0.000186042	0.00241939	-0.0768964	-5.6225e-05	0.00268974	-0.0209035
99	7.49366e-05	0.0023302	0.0321589	8.85482e-05	0.00238343	0.0371515	-0.000200943	0.00357614	-0.0561899	-0.000201745	0.00347305	-0.0580887	-3.32017e-05	0.00375763	-0.0088358	99	7.49366e-05	0.0023302	0.0321589	8.85482e-05	0.00238343	0.0371515	-0.000193497	0.00296915	-0.0651691	-0.000191092	0.00293445	-0.0651203	-3.99764e-05	0.00319614	-0.0125077	99	7.49366e-05	0.0023302	0.0321589	8.85482e-05	0.00238343	0.0371515	-0.000165778	0.00242752	-0.068291	-0.000187243	0.00243448	-0.076913	-5.63657e-05	0.00270394	-0.0208458
100	7.72404e-05	0.0023443	0.0329481	9.08693e-05	0.00239904	0.0378774	-0.000196322	0.0035939	-0.0546264	-0.000202589	0.00349107	-0.0580307	-2.95153e-05	0.00378072	-0.00780681	100	7.72404e-05	0.0023443	0.0329481	9.08693e-05	0.00239904	0.0378774	-0.000191286	0.00298497	-0.064083	-0.000190813	0.00294851	-0.064715	-3.71184e-05	0.0032156	-0.0115432	100	7.72404e-05	0.0023443	0.0329481	9.08693e-05	0.00239904	0.0378774	-0.000163909	0.00244192	-0.0671232	-0.000187908	0.00244801	-0.0767595	-5.54361e-05	0.00272	-0.0203809
101	7.94203e-05	0.00235825	0.0336777	9.29524e-05	0.00241448	0.0384979	-0.000195714	0.00361799	-0.0540948	-0.000205528	0.00350751	-0.0585966	-2.98572e-05	0.00380128	-0.00785449	101	7.94203e-05	0.00235825	0.0336777	9.29524e-05	0.00241448	0.0384979	-0.000190337	0.00300402	-0.0633606	-0.000192562	0.00296316	-0.0649854	-3.64365e-05	0.00323257	-0.0112717	101	7.94203e-05	0.00235825	0.0336777	9.29524e-05	0.00241448	0.0384979	-0.000163842	0.00245571	-0.0667188	-0.000189561	0.00246122	-0.0770191	-5.53915e-05	0.00273606	-0.020245
102	8.17253e-05	0.00237189	0.0344557	9.53597e-05	0.00242961	0.039249	-0.000194668	0.00363676	-0.0535277	-0.000206937	0.00352306	-0.0587379	-2.80088e-05	0.00382273	-0.00732693	102	8.17253e-05	0.00237189	0.0344557	9.53597e-05	0.00242961	0.039249	-0.000189067	0.00302007	-0.0626034	-0.000192343	0.00297792	-0.0645899	-3.48272e-05	0.00325054	-0.0107143	102	8.17253e-05	0.00237189	0.0344557	9.53597e-05	0.00242961	0.039249	-0.000162506	0.00246897	-0.0658192	-0.000189866	0.00247444	-0.0767306	-5.50064e-05	0.00275244	-0.0199846
103	8.39005e-05	0.0023852	0.0351755	9.77131e-05	0.0024446	0.039971	-0.000195196	0.00365468	-0.0534101	-0.00020835	0.00353996	-0.0588566	-2.7687e-05	0.00384005	-0.00721006	103	8.39005e-05	0.0023852	0.0351755	9.77131e-05	0.0024446	0.039971	-0.000189499	0.00303464	-0.0624454	-0.000193826	0.0029912	-0.0647987	-3.50497e-05	0.0032675	-0.0107268	103	8.39005e-05	0.0023852	0.0351755	9.77131e-05	0.0024446	0.039971	-0.000161518	0.00248128	-0.0650947	-0.000190645	0.00248718	-0.0766511	-5.4363e-05	0.00276783	-0.019641
104	8.6267e-05	0.0023985	0.035967	0.000100285	0.00245871	0.0407876	-0.00019426	0.0036756	-0.0528511	-0.000212511	0.00355853	-0.0597188	-2.87942e-05	0.00385941	-0.00746078	104	8.6267e-05	0.0023985	0.035967	0.000100285	0.00245871	0.0407876	-0.000188999	0.00305239	-0.0619183	-0.000196233	0.00300491	-0.065304	-3.61032e-05	0.00328512	-0.0109899	104	8.6267e-05	0.0023985	0.035967	0.000100285	0.00245871	0.0407876	-0.000159907	0.002496	-0.0640651	-0.000192298	0.00250057	-0.0769018	-5.33877e-05	0.00278462	-0.0191723
105	8.83496e-05	0.0024121	0.0366277	0.000102692	0.00247301	0.0415251	-0.000194114	0.00369556	-0.0525263	-0.000216132	0.00357714	-0.0604203	-3.08105e-05	0.00387523	-0.00795061	105	8.83496e-05	0.0024121	0.0366277	0.000102692	0.00247301	0.0415251	-0.000187824	0.00306785	-0.0612233	-0.000198757	0.00301985	-0.0658168	-3.73424e-05	0.00330022	-0.0113151	105	8.83496e-05	0.0024121	0.0366277	0.000102692	0.00247301	0.0415251	-0.000159493	0.00251128	-0.0635107	-0.00019324	0.00251444	-0.0768519	-5.38841e-05	0.00279915	-0.0192502
106	9.02803e-05	0.00242596	0.0372143	0.000104912	0.00248769	0.0421722	-0.000192641	0.00371766	-0.051818	-0.000218119	0.00359681	-0.0606424	-3.08419e-05	0.00389013	-0.00792823	106	9.02803e-05	0.00242596	0.0372143	0.000104912	0.00248769	0.0421722	-0.000187253	0.00308369	-0.0607237	-0.000201056	0.00303407	-0.0662661	-3.6789e-05	0.00331589	-0.0110948	106	9.02803e-05	0.00242596	0.0372143	0.000104912	0.00248769	0.0421722	-0.000158859	0.00252546	-0.0629031	-0.000193836	0.0025286	-0.0766573	-5.32182e-05	0.00281422	-0.0189105
107	9.20613e-05	0.00244001	0.0377299	0.000106933	0.00250233	0.0427333	-0.000192182	0.00373323	-0.0514787	-0.000218654	0.00361499	-0.0604855	-3.10466e-05	0.00391212	-0.00793601	107	9.20613e-05	0.00244001	0.0377299	0.000106933	0.00250233	0.0427333	-0.000185304	0.00309897	-0.0597953	-0.000202296	0.00304677	-0.0663968	-3.68054e-05	0.00333407	-0.0110392	107	9.20613e-05	0.00244001	0.0377299	0.000106933	0.00250233	0.0427333	-0.000159217	0.00253844	-0.0627221	-0.000194732	0.00254086	-0.0766403	-5.30039e-05	0.0028305	-0.018726
108	9.39172e-05	0.00245386	0.0382733	0.000109192	0.00251657	0.0433894	-0.000191276	0.00375185	-0.0509817	-0.000220001	0.00363473	-0.0605274	-3.31035e-05	0.00393012	-0.00842301	108	9.39172e-05	0.00245386	0.0382733	0.000109192	0.00251657	0.0433894	-0.000184296	0.00311447	-0.0591741	-0.000203548	0.00306264	-0.0664617	-3.64742e-05	0.0033513	-0.0108836	108	9.39172e-05	0.00245386	0.0382733	0.000109192	0.00251657	0.0433894	-0.000158282	0.00254986	-0.0620747	-0.00019573	0.00255495	-0.0766083	-5.19954e-05	0.00284414	-0.0182816
109	9.55913e-05	0.00246772	0.0387367	0.000111107	0.00253038	0.043909	-0.000190736	0.00376894	-0.0506073	-0.000222972	0.00365774	-0.0609591	-3.11352e-05	0.00394774	-0.00788684	109	9.55913e-05	0.00246772	0.0387367	0.000111107	0.00253038	0.043909	-0.000184358	0.00313091	-0.0588831	-0.000204996	0.00308132	-0.0665285	-3.53697e-05	0.0033679	-0.010502	109	9.55913e-05	0.00246772	0.0387367	0.000111107	0.00253038	0.043909	-0.000158648	0.00256342	-0.0618894	-0.000197019	0.00256906	-0.0766891	-5.15642e-05	0.0028588	-0.018037
110	9.71022e-05	0.00248158	0.0391292	0.000112996	0.00254422	0.0444128	-0.000191296	0.00378604	-0.0505267	-0.000225561	0.00367475	-0.0613814	-2.91503e-05	0.00396714	-0.00734793	110	9.71022e-05	0.00248158	0.0391292	0.000112996	0.00254422	0.0444128	-0.000184066	0.00314731	-0.0584836	-0.000206088	0.00309499	-0.0665878	-3.40431e-05	0.00338545	-0.0100557	110	9.71022e-05	0.00248158	0.0391292	0.000112996	0.00254422	0.0444128	-0.000157225	0.00257636	-0.061026	-0.000197209	0.00258034	-0.0764275	-4.93618e-05	0.00287374	-0.0171768
111	9.8482e-05	0.00249516	0.0394692	0.000114804	0.00255788	0.0448825	-0.000190457	0.00380432	-0.0500634	-0.000224314	0.00369243	-0.0607496	-2.8044e-05	0.00398985	-0.00702883	111	9.8482e-05	0.00249516	0.0394692	0.000114804	0.00255788	0.0448825	-0.000185224	0.00316326	-0.0585547	-0.000205874	0.00311083	-0.0661798	-3.32334e-05	0.0034041	-0.00976275	111	9.8482e-05	0.00249516	0.0394692	0.000114804	0.00255788	0.0448825	-0.000157547	0.00259072	-0.0608123	-0.00019668	0.0025947	-0.0758008	-4.90864e-05	0.0028892	-0.0169896
112	0.000100084	0.00250872	0.0398943	0.000116684	0.002571	0.0453849	-0.000188052	0.00381894	-0.0492418	-0.000222391	0.00371256	-0.0599025	-2.63482e-05	0.00400954	-0.00657137	112	0.000100084	0.00250872	0.0398943	0.000116684	0.002571	0.0453849	-0.000183608	0.00317683	-0.0577961	-0.00020654	0.00312547	-0.0660829	-3.17961e-05	0.00342107	-0.00929421	112	0.000100084	0.00250872	0.0398943	0.000116684	0.002571	0.0453849	-0.000156345	0.00260416	-0.0600366	-0.000197518	0.00260843	-0.0757228	-4.72972e-05	0.00290545	-0.0162788
113	0.000101795	0.002522	0.0403628	0.000118671	0.00258365	0.0459317	-0.000184385	0.00383217	-0.0481151	-0.000220021	0.00372919	-0.0589998	-2.31899e-05	0.00402894	-0.00575582	113	0.000101795	0.002522	0.0403628	0.000118671	0.00258365	0.0459317	-0.000181113	0.00318732	-0.0568231	-0.000205767	0.00313874	-0.0655572	-3.07096e-05	0.00343887	-0.00893014	113	0.000101795	0.002522	0.0403628	0.000118671	0.00258365	0.0459317	-0.000155467	0.00261451	-0.0594634	-0.000197645	0.00262253	-0.0753641	-4.66396e-05	0.00292213	-0.0159608
114	0.000103627	0.00253489	0.0408805	0.000120864	0.00259601	0.0465575	-0.000184663	0.00384553	-0.0480202	-0.000220393	0.00374632	-0.0588291	-2.20069e-05	0.00404413	-0.0054417	114	0.000103627	0.00253489	0.0408805	0.000120864	0.00259601	0.0465575	-0.000181367	0.00319928	-0.0566899	-0.000206302	0.00315563	-0.0653757	-2.88657e-05	0.00345733	-0.00834912	114	0.000103627	0.00253489	0.0408805	0.000120864	0.00259601	0.0465575	-0.000154404	0.00262589	-0.0588006	-0.000198088	0.00263703	-0.0751179	-4.44373e-05	0.00293795	-0.0151253
115	0.000105468	0.00254771	0.0413971	0.000122898	0.00260843	0.0471156	-0.000181718	0.00385723	-0.047111	-0.000221813	0.00376355	-0.0589371	-2.25784e-05	0.00406311	-0.00555692	115	0.000105468	0.00254771	0.0413971	0.000122898	0.00260843	0.0471156	-0.000180803	0.00321263	-0.056279	-0.000207702	0.00316929	-0.0655358	-2.83074e-05	0.00347493	-0.00814619	115	0.000105468	0.00254771	0.0413971	0.000122898	0.00260843	0.0471156	-0.000154685	0.00263856	-0.0586249	-0.00019957	0.00264971	-0.0753175	-4.45515e-05	0.00295423	-0.0150806
116	0.000107578	0.00256048	0.0420147	0.000125097	0.0026204	0.0477399	-0.000182443	0.00387466	-0.0470863	-0.000219249	0.00377995	-0.0580032	-2.04886e-05	0.00408	-0.00502172	116	0.000107578	0.00256048	0.0420147	0.000125097	0.0026204	0.0477399	-0.000181796	0.00322784	-0.0563213	-0.000207009	0.00318194	-0.0650574	-2.62837e-05	0.00349198	-0.00752688	116	0.000107578	0.00256048	0.0420147	0.000125097	0.0026204	0.0477399	-0.00015524	0.00265083	-0.058563	-0.000199708	0.00266224	-0.0750151	-4.27219e-05	0.00297145	-0.0143775
117	0.000109455	0.00257306	0.0425388	0.000127108	0.00263244	0.0482854	-0.000184556	0.00388747	-0.0474745	-0.000218872	0.00379989	-0.0575995	-2.08777e-05	0.00410115	-0.00509069	117	0.000109455	0.00257306	0.0425388	0.000127108	0.00263244	0.0482854	-0.000182973	0.00324237	-0.0564317	-0.00020778	0.00319658	-0.0650009	-2.77282e-05	0.00351131	-0.00789681	117	0.000109455	0.00257306	0.0425388	0.000127108	0.00263244	0.0482854	-0.000156174	0.00266473	-0.0586077	-0.00019983	0.0026762	-0.0746695	-4.34848e-05	0.00298811	-0.0145526
118	0.000111225	0.00258565	0.0430163	0.000129293	0.00264426	0.0488957	-0.000184329	0.00390546	-0.0471977	-0.000220245	0.00381969	-0.0576603	-1.97381e-05	0.00412199	-0.00478849	118	0.000111225	0.00258565	0.0430163	0.000129293	0.00264426	0.0488957	-0.000182649	0.00325698	-0.0560792	-0.000209124	0.0032135	-0.0650766	-2.60942e-05	0.00352941	-0.00739335	118	0.000111225	0.00258565	0.0430163	0.000129293	0.00264426	0.0488957	-0.000156442	0.00267776	-0.0584227	-0.000200948	0.00268919	-0.0747241	-4.20036e-05	0.00300493	-0.0139782
119	0.000112605	0.00259901	0.043326	0.000130938	0.0026566	0.0492879	-0.000183879	0.00392047	-0.0469023	-0.000220026	0.00383786	-0.0573303	-1.69335e-05	0.00414155	-0.0040887	119	0.000112605	0.00259901	0.043326	0.000130938	0.0026566	0.0492879	-0.000183287	0.0032726	-0.0560067	-0.000210197	0.00322847	-0.0651072	-2.48896e-05	0.00354628	-0.00701851	119	0.000112605	0.00259901	0.043326	0.000130938	0.0026566	0.0492879	-0.000156679	0.00269197	-0.0582025	-0.000201936	0.00270244	-0.0747237	-4.10614e-05	0.00302062	-0.0135937
120	0.000113918	0.00261293	0.0435976	0.00013264	0.00266993	0.0496791	-0.0001837	0.00393738	-0.0466553	-0.000219483	0.00385416	-0.056947	-1.51597e-05	0.00415875	-0.00364526	120	0.000113918	0.00261293	0.0435976	0.00013264	0.00266993	0.0496791	-0.000183913	0.00328849	-0.0559263	-0.000211074	0.00324444	-0.0650571	-2.50343e-05	0.00356339	-0.00702542	120	0.000113918	0.00261293	0.0435976	0.00013264	0.00266993	0.0496791	-0.000157154	0.00270771	-0.0580394	-0.000203137	0.00271562	-0.074803	-4.05081e-05	0.00303469	-0.0133484
121	0.000115282	0.00262606	0.043899	0.000134116	0.00268228	0.0500008	-0.000185124	0.00395338	-0.0468268	-0.000221632	0.0038711	-0.057253	-1.369e-05	0.00417454	-0.0032794	121	0.000115282	0.00262606	0.043899	0.000134116	0.00268228	0.0500008	-0.000185041	0.0033031	-0.0560205	-0.000213316	0.00326108	-0.0654127	-2.44629e-05	0.00358057	-0.00683214	121	0.000115282	0.00262606	0.043899	0.000134116	0.00268228	0.0500008	-0.000157657	0.00272324	-0.057893	-0.000203892	0.00272877	-0.0747196	-4.03248e-05	0.00304889	-0.013226
122	0.000116945	0.00263846	0.0443233	0.00013599	0.00269401	0.0504788	-0.000184049	0.00397141	-0.0463435	-0.000220335	0.00389166	-0.0566172	-1.3835e-05	0.00419601	-0.00329717	122	0.000116945	0.00263846	0.0443233	0.00013599	0.00269401	0.0504788	-0.000185028	0.00331801	-0.0557647	-0.000212879	0.00327688	-0.0649637	-2.36418e-05	0.0035987	-0.00656952	122	0.000116945	0.00263846	0.0443233	0.00013599	0.00269401	0.0504788	-0.000157618	0.00273764	-0.0575743	-0.000203014	0.00274146	-0.0740533	-3.86908e-05	0.00306473	-0.0126245
123	0.000118334	0.00265111	0.0446357	0.000137402	0.00270604	0.0507763	-0.000183899	0.00398887	-0.046103	-0.000218351	0.00390962	-0.0558495	-1.51515e-05	0.00421629	-0.00359355	123	0.000118334	0.00265111	0.0446357	0.000137402	0.00270604	0.0507763	-0.000184953	0.00333261	-0.0554978	-0.000211871	0.00329114	-0.0643761	-2.50476e-05	0.00361783	-0.00692338	123	0.000118334	0.00265111	0.0446357	0.000137402	0.00270604	0.0507763	-0.000158675	0.00275268	-0.0576439	-0.00020268	0.00275418	-0.0735898	-3.74773e-05	0.00308084	-0.0121646
124	0.000119866	0.00266398	0.0449949	0.000139288	0.00271805	0.0512454	-0.000183241	0.00400512	-0.0457516	-0.000217105	0.00392597	-0.0552997	-1.09608e-05	0.00424022	-0.00258496	124	0.000119866	0.00266398	0.0449949	0.000139288	0.00271805	0.0512454	-0.000184393	0.00334773	-0.0550799	-0.000210399	0.00330626	-0.0636365	-2.32136e-05	0.00363635	-0.00638377	124	0.000119866	0.00266398	0.0449949	0.000139288	0.00271805	0.0512454	-0.000157626	0.00276702	-0.056966	-0.000201706	0.00276704	-0.0728958	-3.56265e-05	0.00309781	-0.0115005
125	0.000121454	0.00267701	0.0453694	0.000140992	0.00272933	0.0516583	-0.000183501	0.00402556	-0.045584	-0.000216184	0.00394538	-0.0547943	-8.24651e-06	0.00426121	-0.00193525	125	0.000121454	0.00267701	0.0453694	0.000140992	0.00272933	0.0516583	-0.000183901	0.00336273	-0.054688	-0.00021024	0.00332112	-0.063304	-2.11233e-05	0.00365528	-0.00577886	125	0.000121454	0.00267701	0.0453694	0.000140992	0.00272933	0.0516583	-0.000156826	0.0027804	-0.0564042	-0.000201231	0.00278025	-0.0723789	-3.42986e-05	0.00311321	-0.0110171
126	0.000123203	0.00268967	0.045806	0.000143006	0.00273996	0.0521928	-0.000182909	0.00403885	-0.0452874	-0.000213439	0.00396106	-0.0538844	-4.83336e-06	0.00428031	-0.00112921	126	0.000123203	0.00268967	0.045806	0.000143006	0.00273996	0.0521928	-0.000184361	0.00337577	-0.054613	-0.000209438	0.00333666	-0.0627688	-1.92494e-05	0.00367198	-0.00524223	126	0.000123203	0.00268967	0.045806	0.000143006	0.00273996	0.0521928	-0.000157	0.00279507	-0.0561702	-0.000200845	0.00279332	-0.0719017	-3.25208e-05	0.00312799	-0.0103967
127	0.000124575	0.00270236	0.0460988	0.000144424	0.00275069	0.0525047	-0.000185017	0.0040573	-0.045601	-0.000212591	0.00397843	-0.053436	-4.83533e-06	0.00429908	-0.00112474	127	0.000124575	0.00270236	0.0460988	0.000144424	0.00275069	0.0525047	-0.000185208	0.00339411	-0.0545674	-0.000209379	0.00335166	-0.0624702	-1.80575e-05	0.00368754	-0.0048969	127	0.000124575	0.00270236	0.0460988	0.000144424	0.00275069	0.0525047	-0.000157789	0.00281008	-0.0561511	-0.000200653	0.00280736	-0.071474	-3.1927e-05	0.00314125	-0.0101638
128	0.00012627	0.00271528	0.0465036	0.000146274	0.00276201	0.0529592	-0.000186319	0.00407366	-0.0457375	-0.000212039	0.00399807	-0.0530353	-3.2455e-06	0.00431746	-0.000751715	128	0.00012627	0.00271528	0.0465036	0.000146274	0.00276201	0.0529592	-0.000185202	0.00341012	-0.0543096	-0.000208689	0.0033676	-0.0619696	-1.62428e-05	0.00370346	-0.00438583	128	0.00012627	0.00271528	0.0465036	0.000146274	0.00276201	0.0529592	-0.00015756	0.00282328	-0.0558076	-0.000200595	0.00282031	-0.0711253	-3.05692e-05	0.00315426	-0.00969138
129	0.000128051	0.00272837	0.0469333	0.000148015	0.00277317	0.0533741	-0.00018661	0.00408741	-0.0456547	-0.000211578	0.00401625	-0.0526805	2.75617e-07	0.00433452	6.35864e-05	129	0.000128051	0.00272837	0.0469333	0.000148015	0.00277317	0.0533741	-0.00018556	0.00342503	-0.0541775	-0.00020853	0.00338446	-0.0616137	-1.42974e-05	0.00372064	-0.00384273	129	0.000128051	0.00272837	0.0469333	0.000148015	0.00277317	0.0533741	-0.000158483	0.00283662	-0.0558702	-0.000200473	0.00283379	-0.0707437	-2.80786e-05	0.00316935	-0.00885943
130	0.000130186	0.00274074	0.0475005	0.000150184	0.0027838	0.0539493	-0.000186639	0.00410443	-0.0454724	-0.000211219	0.00403238	-0.0523806	1.16313e-06	0.00435305	0.000267198	130	0.000130186	0.00274074	0.0475005	0.000150184	0.0027838	0.0539493	-0.000186056	0.00343958	-0.0540925	-0.000208941	0.0034002	-0.0614498	-1.36045e-05	0.00373704	-0.00364045	130	0.000130186	0.00274074	0.0475005	0.000150184	0.0027838	0.0539493	-0.000158381	0.00285039	-0.0555646	-0.0002006	0.00284703	-0.0704595	-2.68954e-05	0.00318468	-0.00844524
131	0.000132262	0.00275307	0.0480418	0.000152212	0.00279406	0.0544772	-0.000188972	0.00412025	-0.0458643	-0.0002105	0.00405018	-0.051973	-8.53407e-07	0.00437356	-0.000195129	131	0.000132262	0.00275307	0.0480418	0.000152212	0.00279406	0.0544772	-0.000187675	0.0034554	-0.0543136	-0.000208243	0.00341629	-0.0609559	-1.34687e-05	0.00375291	-0.00358887	131	0.000132262	0.00275307	0.0480418	0.000152212	0.00279406	0.0544772	-0.000159056	0.00286472	-0.0555225	-0.000199608	0.00285961	-0.0698023	-2.65914e-05	0.0031997	-0.00831059
132	0.000134729	0.00276542	0.0487192	0.00015484	0.00280474	0.0552065	-0.000187891	0.00413924	-0.0453927	-0.000210092	0.00406951	-0.051626	1.24333e-06	0.00439567	0.000282854	132	0.000134729	0.00276542	0.0487192	0.00015484	0.00280474	0.0552065	-0.000187512	0.00346948	-0.0540462	-0.000207889	0.00343109	-0.0605898	-1.2104e-05	0.00377073	-0.00320998	132	0.000134729	0.00276542	0.0487192	0.00015484	0.00280474	0.0552065	-0.000158939	0.00287729	-0.0552393	-0.000198984	0.00287235	-0.0692757	-2.53416e-05	0.0032152	-0.00788181
133	0.000136985	0.0027782	0.0493073	0.000157064	0.00281589	0.0557776	-0.000187278	0.00415564	-0.0450661	-0.000208221	0.00408584	-0.0509615	1.70517e-07	0.00441546	3.86181e-05	133	0.000136985	0.0027782	0.0493073	0.000157064	0.00281589	0.0557776	-0.000187675	0.00348421	-0.0538643	-0.000207257	0.00344484	-0.0601644	-1.19011e-05	0.00378761	-0.00314212	133	0.000136985	0.0027782	0.0493073	0.000157064	0.00281589	0.0557776	-0.000159697	0.00288933	-0.0552711	-0.000199056	0.00288648	-0.0689615	-2.49936e-05	0.00322972	-0.00773865
134	0.000139207	0.00279128	0.0498723	0.000159447	0.00282697	0.0564022	-0.000186943	0.00417247	-0.0448039	-0.000207505	0.00410357	-0.0505671	3.56462e-06	0.00443016	0.000804625	134	0.000139207	0.00279128	0.0498723	0.000159447	0.00282697	0.0564022	-0.000186724	0.00349614	-0.0534084	-0.000206665	0.00345877	-0.0597509	-1.0019e-05	0.00380106	-0.00263585	134	0.000139207	0.00279128	0.0498723	0.000159447	0.00282697	0.0564022	-0.000158938	0.00290073	-0.0547925	-0.000198448	0.00289797	-0.0684783	-2.32766e-05	0.00324127	-0.00718131
135	0.000141455	0.00280452	0.0504382	0.000161811	0.00283893	0.0569972	-0.000183902	0.00418852	-0.0439061	-0.00020774	0.00411924	-0.0504316	4.8998e-06	0.00444446	0.00110245	135	0.000141455	0.00280452	0.0504382	0.000161811	0.00283893	0.0569972	-0.000185799	0.0035095	-0.0529416	-0.00020665	0.00347325	-0.0594976	-9.05273e-06	0.00381582	-0.00237242	135	0.000141455	0.00280452	0.0504382	0.000161811	0.00283893	0.0569972	-0.000159061	0.00291273	-0.054609	-0.00019777	0.00291137	-0.0679301	-2.21506e-05	0.00325531	-0.00680444
136	0.000143811	0.00281715	0.0510484	0.000164394	0.00285053	0.0576715	-0.000179575	0.00419958	-0.0427602	-0.00020502	0.00413771	-0.0495493	7.72676e-06	0.00446322	0.00173121	136	0.000143811	0.00281715	0.0510484	0.000164394	0.00285053	0.0576715	-0.000182777	0.00352079	-0.0519135	-0.000204399	0.00348833	-0.0585951	-7.53267e-06	0.0038347	-0.00196434	136	0.000143811	0.00281715	0.0510484	0.000164394	0.00285053	0.0576715	-0.000158169	0.00292352	-0.0541024	-0.000196303	0.00292254	-0.0671687	-2.09379e-05	0.00327175	-0.0063996
137	0.000145913	0.0028299	0.0515611	0.000166637	0.00286189	0.0582262	-0.000179994	0.0042138	-0.0427154	-0.00020305	0.00416129	-0.048795	8.31057e-06	0.00448082	0.0018547	137	0.000145913	0.0028299	0.0515611	0.000166637	0.00286189	0.0582262	-0.000181931	0.00353216	-0.0515071	-0.000202428	0.00350709	-0.0577196	-6.22507e-06	0.00385339	-0.00161548	137	0.000145913	0.0028299	0.0515611	0.000166637	0.00286189	0.0582262	-0.000157197	0.00293505	-0.0535585	-0.000195164	0.00293572	-0.0664791	-1.98388e-05	0.00328776	-0.00603413
138	0.000148123	0.00284252	0.0521095	0.00016913	0.00287306	0.0588675	-0.0001795	0.00422492	-0.0424861	-0.000201531	0.00417823	-0.0482336	9.49967e-06	0.004498	0.00211197	138	0.000148123	0.00284252	0.0521095	0.00016913	0.00287306	0.0588675	-0.000180822	0.00354617	-0.0509908	-0.000202493	0.00352204	-0.0574931	-4.28616e-06	0.00386901	-0.00110782	138	0.000148123	0.00284252	0.0521095	0.00016913	0.00287306	0.0588675	-0.00015813	0.00294636	-0.0536695	-0.000193977	0.00294877	-0.0657823	-1.76598e-05	0.0033027	-0.00534707
139	0.000150105	0.00285543	0.0525683	0.000171328	0.00288473	0.0593914	-0.000181532	0.00424353	-0.0427784	-0.000202061	0.00419626	-0.0481526	1.28185e-05	0.00450911	0.00284281	139	0.000150105	0.00285543	0.0525683	0.000171328	0.00288473	0.0593914	-0.000180819	0.00356332	-0.0507445	-0.000201675	0.00353639	-0.0570283	-9.62807e-07	0.00388239	-0.000247994	139	0.000150105	0.00285543	0.0525683	0.000171328	0.00288473	0.0593914	-0.000158464	0.00295851	-0.053562	-0.000192201	0.00296094	-0.0649122	-1.55863e-05	0.00331691	-0.00469904
140	0.000151918	0.00286816	0.0529671	0.000173409	0.00289609	0.0598769	-0.000182668	0.00425985	-0.0428814	-0.000201747	0.00421399	-0.0478756	1.21071e-05	0.00452513	0.00267552	140	0.000151918	0.00286816	0.0529671	0.000173409	0.00289609	0.0598769	-0.000181426	0.00357853	-0.0506984	-0.000200395	0.00355266	-0.0564072	-1.00601e-07	0.00389925	-2.58e-05	140	0.000151918	0.00286816	0.0529671	0.000173409	0.00289609	0.0598769	-0.000158649	0.00297197	-0.0533816	-0.000191558	0.00297462	-0.0643974	-1.40411e-05	0.00333034	-0.00421613
141	0.000153724	0.0028808	0.0533616	0.000175256	0.0029072	0.0602835	-0.000184466	0.00427701	-0.0431295	-0.000200301	0.00423455	-0.0473017	1.33699e-05	0.0045409	0.00294432	141	0.000153724	0.0028808	0.0533616	0.000175256	0.0029072	0.0602835	-0.0001821	0.00359158	-0.0507018	-0.000199025	0.00356742	-0.0557895	1.37758e-06	0.00391527	0.000351849	141	0.000153724	0.0028808	0.0533616	0.000175256	0.0029072	0.0602835	-0.000159338	0.00298363	-0.0534042	-0.000190987	0.00298764	-0.0639259	-1.27435e-05	0.00334481	-0.00380995
142	0.000155829	0.00289296	0.0538649	0.000177352	0.00291817	0.0607753	-0.000184827	0.00428791	-0.0431043	-0.000197831	0.00424683	-0.0465831	1.61249e-05	0.00455626	0.00353905	142	0.000155829	0.00289296	0.0538649	0.000177352	0.00291817	0.0607753	-0.000180621	0.00360284	-0.0501331	-0.00019693	0.00358053	-0.0550002	3.74841e-06	0.00392869	0.000954113	142	0.000155829	0.00289296	0.0538649	0.000177352	0.00291817	0.0607753	-0.000157991	0.00299419	-0.0527658	-0.000190688	0.0029987	-0.0635902	-1.17001e-05	0.00335921	-0.00348298
143	0.000157903	0.00290491	0.0543573	0.000179458	0.00292898	0.06127	-0.000182704	0.00430166	-0.042473	-0.000197747	0.00426154	-0.0464028	1.46467e-05	0.00457269	0.00320308	143	0.000157903	0.00290491	0.0543573	0.000179458	0.00292898	0.06127	-0.000180862	0.00361472	-0.0500348	-0.000196693	0.00359368	-0.054733	3.28871e-06	0.00394315	0.00083403	143	0.000157903	0.00290491	0.0543573	0.000179458	0.00292898	0.06127	-0.000157397	0.00300578	-0.0523647	-0.000190447	0.00301156	-0.0632388	-1.07063e-05	0.00337425	-0.00317293
144	0.000160211	0.0029161	0.05494	0.000181899	0.00293882	0.0618954	-0.000184217	0.00432112	-0.0426316	-0.000199086	0.0042756	-0.0465633	1.68456e-05	0.00458472	0.00367428	144	0.000160211	0.0029161	0.05494	0.000181899	0.00293882	0.0618954	-0.000181996	0.00362932	-0.0501461	-0.000198042	0.00360598	-0.0549205	5.96382e-06	0.0039554	0.00150777	144	0.000160211	0.0029161	0.05494	0.000181899	0.00293882	0.0618954	-0.000157876	0.00301827	-0.0523068	-0.000190314	0.00302355	-0.0629441	-8.56067e-06	0.00338915	-0.0025259
145	0.000162369	0.00292767	0.0554603	0.000183927	0.00294903	0.0623687	-0.000183817	0.00433937	-0.0423604	-0.000197197	0.00429274	-0.0459373	1.84529e-05	0.00459772	0.0040135	145	0.000162369	0.00292767	0.0554603	0.000183927	0.00294903	0.0623687	-0.000181343	0.00364348	-0.049772	-0.000198041	0.00361801	-0.0547375	7.09176e-06	0.00396924	0.00178668	145	0.000162369	0.00292767	0.0554603	0.000183927	0.00294903	0.0623687	-0.000158158	0.00303211	-0.052161	-0.000189595	0.00303517	-0.062466	-6.23131e-06	0.00340316	-0.00183104
146	0.000164557	0.00293903	0.0559901	0.000186196	0.0029588	0.0629298	-0.000182895	0.00435637	-0.0419834	-0.000197808	0.00430651	-0.0459323	2.02658e-05	0.0046134	0.00439281	146	0.000164557	0.00293903	0.0559901	0.000186196	0.0029588	0.0629298	-0.000179256	0.00365764	-0.0490085	-0.000199079	0.0036294	-0.0548518	9.65724e-06	0.00398383	0.00242411	146	0.000164557	0.00293903	0.0559901	0.000186196	0.0029588	0.0629298	-0.000157109	0.00304448	-0.0516045	-0.000187867	0.00304552	-0.0616863	-4.73677e-06	0.00341868	-0.00138556
147	0.000166594	0.00294994	0.0564737	0.000188161	0.00296817	0.0633931	-0.000183065	0.0043695	-0.0418963	-0.000196458	0.00431799	-0.0454976	2.42863e-05	0.00462843	0.00524719	147	0.000166594	0.00294994	0.0564737	0.000188161	0.00296817	0.0633931	-0.00017866	0.00366951	-0.0486877	-0.000198011	0.00364185	-0.0543709	1.18798e-05	0.00399745	0.00297184	147	0.000166594	0.00294994	0.0564737	0.000188161	0.00296817	0.0633931	-0.000156611	0.00305569	-0.0512521	-0.000186711	0.00305744	-0.0610677	-4.02423e-06	0.00343311	-0.00117218
148	0.000168737	0.00296116	0.0569833	0.000190324	0.00297818	0.0639062	-0.000181656	0.00438475	-0.0414291	-0.00020528	0.00470241	-0.0436543	2.68331e-05	0.00464505	0.0057767	148	0.000168737	0.00296116	0.0569833	0.000190324	0.00297818	0.0639062	-0.000176493	0.00368267	-0.0479253	-0.000202484	0.00381478	-0.0530789	1.2632e-05	0.00401367	0.00314724	148	0.000168737	0.00296116	0.0569833	0.000190324	0.00297818	0.0639062	-0.000154963	0.00306776	-0.0505134	-0.000187984	0.00311717	-0.0603059	-2.58941e-06	0.00344512	-0.000751616
149	0.000170433	0.00297233	0.0573399	0.000192061	0.00298815	0.0642743	-0.000183214	0.00439782	-0.0416602	-0.000199097	0.00434562	-0.0458154	2.83046e-05	0.00465979	0.00607421	149	0.000170433	0.00297233	0.0573399	0.000192061	0.00298815	0.0642743	-0.000177074	0.0036961	-0.0479083	-0.000197749	0.00366577	-0.0539449	1.47453e-05	0.00402712	0.0036615	149	0.000170433	0.00297233	0.0573399	0.000192061	0.00298815	0.0642743	-0.000154635	0.00307917	-0.0502197	-0.000184684	0.00307841	-0.0599933	-3.21705e-07	0.00345665	-9.30683e-05
150	0.000172075	0.00298302	0.0576847	0.0001941	0.00299772	0.0647492	-0.000179343	0.00440803	-0.0406855	-0.000196387	0.00435677	-0.0450763	2.73146e-05	0.0046786	0.0058382	150	0.000172075	0.00298302	0.0576847	0.0001941	0.00299772	0.0647492	-0.000174844	0.00370813	-0.0471515	-0.000196522	0.0036774	-0.0534406	1.57752e-05	0.00404227	0.00390255	150	0.000172075	0.00298302	0.0576847	0.0001941	0.00299772	0.0647492	-0.000153955	0.00309173	-0.0497958	-0.00018427	0.00308846	-0.0596642	4.61799e-07	0.00347005	0.000133082
151	0.000173665	0.0029944	0.0579967	0.000195968	0.00300775	0.0651545	-0.000178132	0.00442559	-0.0402505	-0.00019546	0.00437075	-0.0447201	3.07261e-05	0.00469533	0.00654397	151	0.000173665	0.0029944	0.0579967	0.000195968	0.00300775	0.0651545	-0.000173748	0.00372177	-0.0466842	-0.00019626	0.00369073	-0.0531764	1.91871e-05	0.00405671	0.00472972	151	0.000173665	0.0029944	0.0579967	0.000195968	0.00300775	0.0651545	-0.000152866	0.0031046	-0.0492385	-0.000182477	0.00309913	-0.0588801	6.24065e-07	0.00352652	0.000176964
152	0.000175198	0.00300593	0.0582841	0.000197857	0.00301795	0.06556	-0.00017659	0.00443977	-0.0397745	-0.000196554	0.00438523	-0.0448219	3.26036e-05	0.00470935	0.00692317	152	0.000175198	0.00300593	0.0582841	0.000197857	0.00301795	0.06556	-0.000173206	0.0037336	-0.0463912	-0.000196656	0.00370309	-0.0531059	1.96529e-05	0.00407131	0.00482717	152	0.000175198	0.00300593	0.0582841	0.000197857	0.00301795	0.06556	-0.000152864	0.00311622	-0.0490541	-0.000181056	0.00311117	-0.0581955	3.88687e-06	0.00349841	0.00111104
153	0.000176565	0.0030179	0.0585059	0.000199471	0.00302808	0.0658739	-0.000175678	0.00445773	-0.0394096	-0.000198832	0.00439782	-0.0452115	2.57529e-05	0.00507321	0.00507626	153	0.000176565	0.0030179	0.0585059	0.000199471	0.00302808	0.0658739	-0.000173579	0.00374904	-0.0462996	-0.000196106	0.00371542	-0.0527818	1.59124e-05	0.00423098	0.00376094	153	0.000176565	0.0030179	0.0585059	0.000199471	0.00302808	0.0658739	-0.000153665	0.00312818	-0.0491226	-0.000180612	0.00312355	-0.0578226	1.98431e-06	0.00355237	0.000558589
154	0.000177783	0.00302995	0.0586752	0.000201129	0.00303858	0.0661919	-0.000175364	0.00447616	-0.0391773	-0.000198779	0.00440962	-0.0450785	3.58117e-05	0.00474505	0.00754717	154	0.000177783	0.00302995	0.0586752	0.000201129	0.00303858	0.0661919	-0.000172775	0.00376427	-0.0458986	-0.000201136	0.00388696	-0.0517464	2.06087e-05	0.00410483	0.0050206	154	0.000177783	0.00302995	0.0586752	0.000201129	0.00303858	0.0661919	-0.000153856	0.00314079	-0.0489863	-0.000182799	0.00318458	-0.0574013	5.72347e-06	0.00352897	0.00162185
155	0.000178838	0.00304265	0.0587772	0.000202413	0.00304953	0.0663749	-0.000173822	0.00449184	-0.0386972	-0.000198631	0.0044247	-0.0448915	3.77025e-05	0.00476254	0.00791647	155	0.000178838	0.00304265	0.0587772	0.000202413	0.00304953	0.0663749	-0.000172902	0.00377802	-0.0457652	-0.000196091	0.0037373	-0.0524688	2.25751e-05	0.00412135	0.0054776	155	0.000178838	0.00304265	0.0587772	0.000202413	0.00304953	0.0663749	-0.000154687	0.00315299	-0.0490605	-0.000180649	0.00314717	-0.0574004	7.21244e-06	0.00354334	0.00203549
156	0.000179773	0.00305521	0.0588416	0.000203691	0.00306014	0.0665627	-0.000175242	0.00450322	-0.0389148	-0.000199268	0.00444165	-0.0448636	3.86667e-05	0.00478431	0.00808198	156	0.000179773	0.00305521	0.0588416	0.000203691	0.00306014	0.0665627	-0.000173205	0.00378895	-0.0457133	-0.000196085	0.00375114	-0.0522733	2.37113e-05	0.00413752	0.00573082	156	0.000179773	0.00305521	0.0588416	0.000203691	0.00306014	0.0665627	-0.000154412	0.0031651	-0.0487859	-0.000179684	0.00315936	-0.0568734	8.8217e-06	0.00355641	0.00248051
157	0.000180814	0.00306742	0.0589468	0.0002048	0.00307041	0.0667014	-0.000175768	0.0045212	-0.0388765	-0.000199397	0.00445593	-0.0447487	4.07462e-05	0.00480525	0.00847952	157	0.000180814	0.00306742	0.0589468	0.0002048	0.00307041	0.0667014	-0.000174302	0.00380474	-0.0458117	-0.000197372	0.00376616	-0.0524066	2.48795e-05	0.00415414	0.00598909	157	0.000180814	0.00306742	0.0589468	0.0002048	0.00307041	0.0667014	-0.000154752	0.00317834	-0.0486894	-0.000180553	0.00317323	-0.0568989	9.0151e-06	0.00357087	0.00252462
158	0.000181849	0.00307967	0.0590481	0.000206083	0.00308117	0.0668848	-0.000175394	0.0045381	-0.0386492	-0.000199922	0.00447219	-0.0447033	3.86944e-05	0.00481736	0.00803229	158	0.000181849	0.00307967	0.0590481	0.000206083	0.00308117	0.0668848	-0.000173952	0.00382144	-0.0455199	-0.000195787	0.00378133	-0.0517774	2.47569e-05	0.00416816	0.00593953	158	0.000181849	0.00307967	0.0590481	0.000206083	0.00308117	0.0668848	-0.000154853	0.00319338	-0.048492	-0.000181017	0.00318783	-0.0567838	9.5119e-06	0.003585	0.00265325
159	0.000183071	0.00309179	0.0592119	0.000207327	0.00309184	0.0670561	-0.000174994	0.00455225	-0.0384412	-0.000200291	0.00448949	-0.0446134	3.89879e-05	0.00483714	0.00806011	159	0.000183071	0.00309179	0.0592119	0.000207327	0.00309184	0.0670561	-0.000173557	0.00383452	-0.0452617	-0.000196095	0.00379573	-0.0516619	2.6164e-05	0.00418615	0.00625013	159	0.000183071	0.00309179	0.0592119	0.000207327	0.00309184	0.0670561	-0.000154744	0.00320704	-0.0482514	-0.000183639	0.00325103	-0.0564862	1.02811e-05	0.00359917	0.0028565
160	0.000184513	0.00310393	0.0594451	0.000209078	0.00310215	0.0673978	-0.000177765	0.00457102	-0.0388896	-0.000202015	0.00450802	-0.0448123	3.95105e-05	0.00485561	0.00813708	160	0.000184513	0.00310393	0.0594451	0.000209078	0.00310215	0.0673978	-0.000175851	0.00385105	-0.0456632	-0.000197061	0.00381165	-0.0516998	2.69205e-05	0.00420252	0.00640579	160	0.000184513	0.00310393	0.0594451	0.000209078	0.00310215	0.0673978	-0.000155461	0.00321941	-0.0482886	-0.000181892	0.00321588	-0.0565606	1.129e-05	0.00361455	0.00312349
161	0.000185692	0.00311642	0.059585	0.000210559	0.00311256	0.0676481	-0.000180446	0.00459174	-0.039298	-0.000202903	0.00453194	-0.0447716	3.29483e-05	0.00520931	0.00632488	161	0.000185692	0.00311642	0.059585	0.000210559	0.00311256	0.0676481	-0.000182499	0.00402139	-0.0453821	-0.000197351	0.00382852	-0.0515475	2.32133e-05	0.00435728	0.00532747	161	0.000185692	0.00311642	0.059585	0.000210559	0.00311256	0.0676481	-0.000159665	0.00328832	-0.0485552	-0.000184337	0.00327591	-0.0562704	9.79034e-06	0.00366943	0.00266808
162	0.00018688	0.00312833	0.0597381	0.000212237	0.00312262	0.0679675	-0.000180705	0.00460851	-0.0392113	-0.000200672	0.00455062	-0.0440976	4.04797e-05	0.00489667	0.00826678	162	0.00018688	0.00312833	0.0597381	0.000212237	0.00312262	0.0679675	-0.000178474	0.00388065	-0.0459908	-0.000195273	0.00384407	-0.0507984	2.71032e-05	0.0042384	0.00639467	162	0.00018688	0.00312833	0.0597381	0.000212237	0.00312262	0.0679675	-0.000157878	0.00324213	-0.0486957	-0.000181949	0.00324187	-0.0561248	1.22275e-05	0.00364653	0.00335319
163	0.000187493	0.00313985	0.059714	0.000213462	0.00313236	0.0681474	-0.000183636	0.00462201	-0.0397308	-0.000199565	0.0045646	-0.0437201	3.97381e-05	0.00491468	0.0080856	163	0.000187493	0.00313985	0.059714	0.000213462	0.00313236	0.0681474	-0.000180684	0.00389327	-0.0464094	-0.000194529	0.00385691	-0.0504365	2.54203e-05	0.00425475	0.00597458	163	0.000187493	0.00313985	0.059714	0.000213462	0.00313236	0.0681474	-0.000158518	0.00325227	-0.0487408	-0.000181684	0.00325425	-0.0558298	1.11024e-05	0.00366278	0.00303113
164	0.000188329	0.00315141	0.0597603	0.000214927	0.00314227	0.0683988	-0.000185849	0.00463506	-0.0400964	-0.000199972	0.00457882	-0.0436734	4.08278e-05	0.00493357	0.0082755	164	0.000188329	0.00315141	0.0597603	0.000214927	0.00314227	0.0683988	-0.000181483	0.00390649	-0.0464568	-0.000195283	0.00386934	-0.0504693	2.60457e-05	0.0042721	0.00609669	164	0.000188329	0.00315141	0.0597603	0.000214927	0.00314227	0.0683988	-0.000158769	0.00326274	-0.0486612	-0.000182246	0.00326671	-0.0557889	1.08553e-05	0.00367639	0.00295272
165	0.000189048	0.00316321	0.0597646	0.000216076	0.0031522	0.0685477	-0.000189176	0.00465035	-0.04068	-0.000199913	0.00459638	-0.0434935	3.99e-05	0.00494777	0.00806423	165	0.000189048	0.00316321	0.0597646	0.000216076	0.0031522	0.0685477	-0.000182973	0.00392177	-0.0466557	-0.000196488	0.00388379	-0.0505918	2.60049e-05	0.0042833	0.00607124	165	0.000189048	0.00316321	0.0597646	0.000216076	0.0031522	0.0685477	-0.000158817	0.00327411	-0.0485071	-0.000186277	0.0033263	-0.0560012	1.1656e-05	0.00368842	0.00316017
166	0.000190188	0.00317502	0.0599013	0.000217628	0.0031617	0.0688328	-0.000191274	0.00466476	-0.0410042	-0.00019988	0.00461144	-0.0433443	4.01373e-05	0.00496078	0.00809092	166	0.000190188	0.00317502	0.0599013	0.000217628	0.0031617	0.0688328	-0.000183064	0.00393546	-0.0465164	-0.000195244	0.00389769	-0.0500922	2.76182e-05	0.00429689	0.00642748	166	0.000190188	0.00317502	0.0599013	0.000217628	0.0031617	0.0688328	-0.000159676	0.00328586	-0.048595	-0.000183479	0.0032921	-0.055733	1.25778e-05	0.00370241	0.0033972
167	0.000191032	0.00318696	0.0599418	0.000218956	0.00317133	0.0690423	-0.000193316	0.00467785	-0.0413258	-0.000198392	0.00462913	-0.0428573	3.83797e-05	0.00497852	0.00770906	167	0.000191032	0.00318696	0.0599418	0.000218956	0.00317133	0.0690423	-0.000182427	0.00394986	-0.0461857	-0.000195516	0.0039139	-0.0499544	2.66617e-05	0.00431206	0.00618304	167	0.000191032	0.00318696	0.0599418	0.000218956	0.00317133	0.0690423	-0.000159382	0.00329898	-0.0483124	-0.000183784	0.00330515	-0.0556053	1.36584e-05	0.00371619	0.00367538
168	0.000191817	0.00319938	0.0599544	0.000220187	0.00318123	0.0692146	-0.000194322	0.00469443	-0.0413942	-0.00019927	0.00464567	-0.0428937	3.89537e-05	0.00499489	0.0077987	168	0.000191817	0.00319938	0.0599544	0.000220187	0.00318123	0.0692146	-0.000182743	0.00396252	-0.046118	-0.000195955	0.00392811	-0.0498854	2.80692e-05	0.00432697	0.00648703	168	0.000191817	0.00319938	0.0599544	0.000220187	0.00318123	0.0692146	-0.000158683	0.00331028	-0.0479365	-0.000184619	0.00331706	-0.0556574	1.45486e-05	0.00373067	0.00389973
169	0.000192446	0.00321222	0.0599106	0.00022111	0.00319179	0.0692747	-0.000196829	0.00470777	-0.0418094	-0.00020032	0.00466273	-0.042962	3.72787e-05	0.00501093	0.00743946	169	0.000192446	0.00321222	0.0599106	0.00022111	0.00319179	0.0692747	-0.000183541	0.00397395	-0.0461861	-0.000196024	0.00394286	-0.0497161	2.71363e-05	0.00434275	0.00624864	169	0.000192446	0.00321222	0.0599106	0.00022111	0.00319179	0.0692747	-0.000159393	0.00332105	-0.0479947	-0.00018796	0.0033761	-0.0556735	1.43214e-05	0.00374458	0.00382456
170	0.000193365	0.00322453	0.0599669	0.000222418	0.00320215	0.0694589	-0.000198321	0.00472484	-0.0419742	-0.000200142	0.00468002	-0.0427652	3.96495e-05	0.00502561	0.00788948	170	0.000193365	0.00322453	0.0599669	0.000222418	0.00320215	0.0694589	-0.000184729	0.00398846	-0.0463157	-0.000196197	0.00395715	-0.0495803	2.88514e-05	0.00435561	0.00662396	170	0.000193365	0.00322453	0.0599669	0.000222418	0.00320215	0.0694589	-0.000159232	0.00333162	-0.0477941	-0.000185766	0.00334362	-0.0555585	1.54897e-05	0.00375645	0.0041235
171	0.000194412	0.00323584	0.0600809	0.000223598	0.00321195	0.0696145	-0.000199868	0.00473921	-0.0421734	-0.000202146	0.00469539	-0.0430521	4.04216e-05	0.00504409	0.00801366	171	0.000194412	0.00323584	0.0600809	0.000223598	0.00321195	0.0696145	-0.000186313	0.00400297	-0.0465436	-0.000198564	0.00397123	-0.0500006	2.97852e-05	0.00437115	0.00681403	171	0.000194412	0.00323584	0.0600809	0.000223598	0.00321195	0.0696145	-0.000160078	0.00334288	-0.0478864	-0.000186754	0.00335607	-0.0556467	1.62373e-05	0.00376926	0.00430783
172	0.000195232	0.00324741	0.0601193	0.000225049	0.00322191	0.0698496	-0.000199817	0.00475108	-0.0420571	-0.000201606	0.00470891	-0.0428137	4.06939e-05	0.00505679	0.00804738	172	0.000195232	0.00324741	0.0601193	0.000225049	0.00322191	0.0698496	-0.000186518	0.0040148	-0.0464576	-0.000198324	0.00398361	-0.0497849	3.00919e-05	0.00438187	0.00686735	172	0.000195232	0.00324741	0.0601193	0.000225049	0.00322191	0.0698496	-0.000160114	0.00335495	-0.0477248	-0.000187079	0.00336694	-0.0555636	1.72968e-05	0.00378089	0.0045748
173	0.000196247	0.00325901	0.060217	0.000226613	0.00323173	0.0701212	-0.000201617	0.0047662	-0.0423014	-0.000202041	0.00472425	-0.0427668	4.22923e-05	0.00507354	0.00833586	173	0.000196247	0.00325901	0.060217	0.000226613	0.00323173	0.0701212	-0.000189086	0.00402827	-0.0469399	-0.000199115	0.00399564	-0.049833	3.16458e-05	0.00439624	0.00719837	173	0.000196247	0.00325901	0.060217	0.000226613	0.00323173	0.0701212	-0.000161284	0.00336564	-0.0479207	-0.000187175	0.00337776	-0.0554138	1.88165e-05	0.00379507	0.00495814
174	0.000197146	0.00327092	0.0602722	0.000228104	0.00324176	0.0703641	-0.000201689	0.00477917	-0.0422017	-0.00020288	0.00473932	-0.0428078	4.31762e-05	0.00508712	0.00848737	174	0.000197146	0.00327092	0.0602722	0.000228104	0.00324176	0.0703641	-0.000189646	0.00404151	-0.0469246	-0.000198811	0.00400929	-0.0495876	3.28964e-05	0.00440928	0.00746072	174	0.000197146	0.00327092	0.0602722	0.000228104	0.00324176	0.0703641	-0.000161214	0.00337566	-0.0477578	-0.000186558	0.00338835	-0.0550585	2.04772e-05	0.00380757	0.00537801
175	0.000198071	0.0032832	0.0603285	0.000229483	0.00325191	0.0705686	-0.00020164	0.00479255	-0.0420737	-0.000203419	0.00475369	-0.0427918	4.59223e-05	0.00510434	0.00899673	175	0.000198071	0.0032832	0.0603285	0.000229483	0.00325191	0.0705686	-0.000188542	0.00405485	-0.0464978	-0.000199293	0.00402301	-0.0495383	3.55393e-05	0.0044238	0.00803365	175	0.000198071	0.0032832	0.0603285	0.000229483	0.00325191	0.0705686	-0.00016084	0.00338637	-0.0474962	-0.000186689	0.00339801	-0.0549408	2.19738e-05	0.00382114	0.00575057
176	0.000199337	0.00329552	0.0604872	0.000231301	0.00326209	0.0709059	-0.000202547	0.00480906	-0.0421177	-0.000202555	0.00476822	-0.0424802	4.86456e-05	0.0051244	0.00949294	176	0.000199337	0.00329552	0.0604872	0.000231301	0.00326209	0.0709059	-0.000187331	0.0040682	-0.0460476	-0.000198691	0.00403717	-0.0492155	3.74687e-05	0.00444228	0.00843455	176	0.000199337	0.00329552	0.0604872	0.000231301	0.00326209	0.0709059	-0.000159833	0.00339788	-0.047039	-0.000185045	0.00340802	-0.0542969	2.44443e-05	0.00383509	0.00637387
177	0.000200682	0.00330792	0.0606671	0.000233028	0.00327253	0.0712072	-0.000204562	0.00482455	-0.0424001	-0.000203862	0.00478201	-0.0426309	5.0773e-05	0.00514439	0.00986958	177	0.000200682	0.00330792	0.0606671	0.000233028	0.00327253	0.0712072	-0.000187066	0.00408142	-0.0458336	-0.000199613	0.00405011	-0.0492859	3.97234e-05	0.00445865	0.00890927	177	0.000200682	0.00330792	0.0606671	0.000233028	0.00327253	0.0712072	-0.00015914	0.00341028	-0.0466649	-0.000184814	0.0034189	-0.0540565	2.65887e-05	0.00384875	0.00690839
178	0.000202347	0.00332083	0.0609325	0.000235087	0.00328344	0.0715978	-0.000201678	0.0048418	-0.0416535	-0.000202152	0.00479816	-0.0421312	5.26462e-05	0.00516484	0.0101932	178	0.000202347	0.00332083	0.0609325	0.000235087	0.00328344	0.0715978	-0.00018472	0.00409734	-0.0450828	-0.000198192	0.00406337	-0.0487753	4.09995e-05	0.00447477	0.00916238	178	0.000202347	0.00332083	0.0609325	0.000235087	0.00328344	0.0715978	-0.000158719	0.00342243	-0.0463762	-0.00018361	0.00342883	-0.053549	2.92682e-05	0.00386256	0.00757742
179	0.000203896	0.00333398	0.0611569	0.000236924	0.00329503	0.0719034	-0.000202829	0.00485923	-0.0417408	-0.000201676	0.0048141	-0.0418929	5.4464e-05	0.00518039	0.0105135	179	0.000203896	0.00333398	0.0611569	0.000236924	0.00329503	0.0719034	-0.000186024	0.00411115	-0.0452485	-0.00019816	0.00407472	-0.0486316	4.28135e-05	0.00448818	0.00953916	179	0.000203896	0.00333398	0.0611569	0.000236924	0.00329503	0.0719034	-0.000158841	0.00343262	-0.046274	-0.000183999	0.00343876	-0.0535074	3.08563e-05	0.00387537	0.00796216
180	0.000205613	0.00334706	0.0614309	0.000238939	0.00330668	0.0722593	-0.000202715	0.00487551	-0.0415783	-0.000201037	0.00482715	-0.0416472	5.74922e-05	0.00519765	0.0110612	180	0.000205613	0.00334706	0.0614309	0.000238939	0.00330668	0.0722593	-0.000185327	0.00412372	-0.0449416	-0.00019759	0.00408518	-0.0483677	4.38572e-05	0.00450432	0.00973668	180	0.000205613	0.00334706	0.0614309	0.000238939	0.00330668	0.0722593	-0.000157391	0.00344416	-0.0456981	-0.000183967	0.00344987	-0.0533258	3.22425e-05	0.00388941	0.00828983
181	0.000206997	0.00335995	0.0616071	0.000240586	0.00331801	0.0725091	-0.000203115	0.00489292	-0.0415121	-0.000200575	0.00484721	-0.0413795	5.95462e-05	0.00521206	0.0114247	181	0.000206997	0.00335995	0.0616071	0.000240586	0.00331801	0.0725091	-0.000183356	0.00413753	-0.0443153	-0.000196149	0.00410111	-0.0478283	4.58895e-05	0.00451776	0.0101576	181	0.000206997	0.00335995	0.0616071	0.000240586	0.00331801	0.0725091	-0.000156835	0.00345421	-0.045404	-0.000183708	0.00346324	-0.0530451	3.42005e-05	0.00390252	0.0087637
182	0.000208565	0.00337328	0.0618287	0.000242653	0.0033299	0.0728708	-0.000202905	0.00491137	-0.0413133	-0.000202485	0.00486115	-0.0416536	6.2966e-05	0.00522798	0.012044	182	0.000208565	0.00337328	0.0618287	0.000242653	0.0033299	0.0728708	-0.000181609	0.004153	-0.0437296	-0.000195824	0.004117	-0.0475647	4.95205e-05	0.00453286	0.0109248	182	0.000208565	0.00337328	0.0618287	0.000242653	0.0033299	0.0728708	-0.00015514	0.00346695	-0.0447482	-0.000182978	0.00347675	-0.0526289	3.62096e-05	0.00391569	0.00924729
183	0.000209794	0.00338674	0.0619458	0.000244151	0.00334199	0.0730554	-0.000201846	0.00492615	-0.0409744	-0.000201538	0.00487731	-0.0413215	6.5213e-05	0.00524255	0.0124392	183	0.000209794	0.00338674	0.0619458	0.000244151	0.00334199	0.0730554	-0.000181571	0.00416497	-0.0435947	-0.000196432	0.00413285	-0.0475294	5.21734e-05	0.00454456	0.0114804	183	0.000209794	0.00338674	0.0619458	0.000244151	0.00334199	0.0730554	-0.000155101	0.00348018	-0.044567	-0.000182281	0.00348943	-0.052238	3.84692e-05	0.00392627	0.00979791
184	0.000211424	0.0034002	0.0621799	0.00024624	0.00335429	0.0734102	-0.000201074	0.00493994	-0.0407038	-0.000198479	0.00489339	-0.0405607	6.69282e-05	0.00526155	0.0127202	184	0.000211424	0.0034002	0.0621799	0.00024624	0.00335429	0.0734102	-0.000182	0.00417581	-0.0435844	-0.00019443	0.00414655	-0.0468897	5.3604e-05	0.00456061	0.0117537	184	0.000211424	0.0034002	0.0621799	0.00024624	0.00335429	0.0734102	-0.000154291	0.00349141	-0.0441916	-0.000180531	0.00350157	-0.0515572	4.06426e-05	0.00393982	0.0103158
185	0.000213409	0.00341385	0.0625127	0.000248414	0.00336651	0.0737899	-0.000202671	0.00495466	-0.0409051	-0.000196889	0.0049131	-0.0400744	6.98572e-05	0.0052778	0.013236	185	0.000213409	0.00341385	0.0625127	0.000248414	0.00336651	0.0737899	-0.000183207	0.00418917	-0.0437335	-0.000193345	0.00416208	-0.046454	5.61656e-05	0.00457446	0.0122781	185	0.000213409	0.00341385	0.0625127	0.000248414	0.00336651	0.0737899	-0.000154355	0.00350426	-0.0440477	-0.00017905	0.00351352	-0.0509604	4.29969e-05	0.00394979	0.0108859
186	0.000215352	0.00342786	0.0628239	0.000250793	0.00337941	0.074212	-0.000206078	0.00496723	-0.0414874	-0.000194886	0.00492791	-0.0395474	7.45941e-05	0.00529092	0.0140985	186	0.000215352	0.00342786	0.0628239	0.000250793	0.00337941	0.074212	-0.000186316	0.0041999	-0.0443622	-0.000192352	0.00417474	-0.0460753	6.03998e-05	0.00458827	0.0131639	186	0.000215352	0.00342786	0.0628239	0.000250793	0.00337941	0.074212	-0.000154644	0.00351499	-0.0439958	-0.000177086	0.00352559	-0.0502288	4.57823e-05	0.00396233	0.0115544
187	0.000217369	0.00344196	0.0631526	0.000252876	0.00339236	0.074543	-0.000209991	0.00497914	-0.0421741	-0.000195546	0.00494116	-0.0395749	7.78529e-05	0.00530713	0.0146695	187	0.000217369	0.00344196	0.0631526	0.000252876	0.00339236	0.074543	-0.000187924	0.00421405	-0.0445947	-0.000192904	0.00419051	-0.0460337	6.21646e-05	0.00460122	0.0135104	187	0.000217369	0.00344196	0.0631526	0.000252876	0.00339236	0.074543	-0.000155438	0.00352685	-0.0440728	-0.000177303	0.00353856	-0.0501061	4.78461e-05	0.00397483	0.0120373
188	0.000219251	0.0034564	0.0634334	0.000254986	0.00340606	0.0748623	-0.000213187	0.00499326	-0.042695	-0.000195989	0.00496027	-0.0395119	8.0178e-05	0.00531919	0.0150733	188	0.000219251	0.0034564	0.0634334	0.000254986	0.00340606	0.0748623	-0.000190218	0.00422706	-0.045	-0.000192383	0.00420718	-0.0457273	6.51354e-05	0.00461406	0.0141167	188	0.000219251	0.0034564	0.0634334	0.000254986	0.00340606	0.0748623	-0.000156297	0.00353927	-0.0441608	-0.000177463	0.00355324	-0.0499441	4.98359e-05	0.0039876	0.0124977
189	0.000220794	0.00347044	0.0636212	0.000256757	0.00341915	0.0750937	-0.000215845	0.00501112	-0.0430732	-0.000198332	0.00497694	-0.0398502	8.03127e-05	0.00533856	0.0150439	189	0.000220794	0.00347044	0.0636212	0.000256757	0.00341915	0.0750937	-0.000191783	0.00423905	-0.0452421	-0.000193157	0.00422239	-0.0457459	6.54044e-05	0.00463247	0.0141187	189	0.000220794	0.00347044	0.0636212	0.000256757	0.00341915	0.0750937	-0.000157562	0.00355071	-0.0443748	-0.000177134	0.00356732	-0.0496546	5.01021e-05	0.00400366	0.0125141
190	0.000222301	0.00348504	0.0637872	0.000259031	0.00343297	0.0754541	-0.000220597	0.00503017	-0.0438547	-0.000200905	0.00499133	-0.0402508	7.97909e-05	0.00535244	0.0149074	190	0.000222301	0.00348504	0.0637872	0.000259031	0.00343297	0.0754541	-0.000195226	0.00425148	-0.0459196	-0.000195072	0.00423557	-0.0460557	6.56387e-05	0.00464669	0.0141259	190	0.000222301	0.00348504	0.0637872	0.000259031	0.00343297	0.0754541	-0.000158404	0.00356173	-0.0444739	-0.000178099	0.00358001	-0.0497482	5.02211e-05	0.00401634	0.0125042
191	0.000224343	0.00349951	0.0641069	0.000261389	0.00344675	0.0758364	-0.000223743	0.00504545	-0.0443455	-0.000199607	0.00500822	-0.0398558	8.00328e-05	0.0053629	0.0149234	191	0.000224343	0.00349951	0.0641069	0.000261389	0.00344675	0.0758364	-0.000197104	0.00426162	-0.046251	-0.00019608	0.00424887	-0.0461487	6.63306e-05	0.00466029	0.0142331	191	0.000224343	0.00349951	0.0641069	0.000261389	0.00344675	0.0758364	-0.000158396	0.00357346	-0.0443258	-0.000177339	0.00359259	-0.0493625	5.10707e-05	0.00402899	0.0126758
192	0.000226307	0.00351431	0.064396	0.000263726	0.00346097	0.0762002	-0.000224989	0.00506164	-0.0444498	-0.000197614	0.00502615	-0.0393172	8.02142e-05	0.0053779	0.0149155	192	0.000226307	0.00351431	0.064396	0.000263726	0.00346097	0.0762002	-0.000197891	0.00427509	-0.0462894	-0.00019437	0.00425934	-0.0456339	6.75375e-05	0.0046732	0.0144521	192	0.000226307	0.00351431	0.064396	0.000263726	0.00346097	0.0762002	-0.000158941	0.00358605	-0.0443221	-0.000176688	0.00360388	-0.0490273	5.19481e-05	0.00404074	0.0128561
193	0.000228031	0.00352887	0.0646186	0.000265709	0.003475	0.076463	-0.000226836	0.00507492	-0.0446976	-0.000197008	0.00504388	-0.0390589	7.97949e-05	0.00539369	0.0147941	193	0.000228031	0.00352887	0.0646186	0.000265709	0.003475	0.076463	-0.00019819	0.00428924	-0.0462063	-0.000194597	0.00427235	-0.045548	6.76068e-05	0.00468661	0.0144255	193	0.000228031	0.00352887	0.0646186	0.000265709	0.003475	0.076463	-0.000158509	0.00359747	-0.0440611	-0.000176649	0.00361469	-0.0488699	5.31607e-05	0.00405546	0.0131084
194	0.000229708	0.00354372	0.0648213	0.0002679	0.00348926	0.0767786	-0.00022822	0.00508936	-0.0448426	-0.000196337	0.00505959	-0.0388049	8.21401e-05	0.00541127	0.0151795	194	0.000229708	0.00354372	0.0648213	0.0002679	0.00348926	0.0767786	-0.000198929	0.00430301	-0.0462301	-0.00019312	0.00428706	-0.0450471	7.02288e-05	0.00470118	0.0149386	194	0.000229708	0.00354372	0.0648213	0.0002679	0.00348926	0.0767786	-0.000158244	0.00360837	-0.0438547	-0.000175827	0.00362665	-0.0484818	5.43136e-05	0.00407131	0.0133406
195	0.000231671	0.00355791	0.0651144	0.000270001	0.00350273	0.0770832	-0.000227478	0.00510824	-0.0445315	-0.000196422	0.0050778	-0.0386825	8.30899e-05	0.00542876	0.0153055	195	0.000231671	0.00355791	0.0651144	0.000270001	0.00350273	0.0770832	-0.000198124	0.00431714	-0.0458925	-0.000192169	0.00429966	-0.0446939	7.2296e-05	0.00471887	0.0153206	195	0.000231671	0.00355791	0.0651144	0.000270001	0.00350273	0.0770832	-0.000157571	0.00361886	-0.0435416	-0.000174982	0.00363859	-0.0480907	5.58724e-05	0.00408691	0.0136711
196	0.000233731	0.00357237	0.0654274	0.000272359	0.00351619	0.0774586	-0.00022685	0.00511606	-0.0443408	-0.000195043	0.00509171	-0.038306	8.24856e-05	0.00544722	0.0151427	196	0.000233731	0.00357237	0.0654274	0.000272359	0.00351619	0.0774586	-0.000198237	0.00432569	-0.0458278	-0.000191354	0.00431197	-0.0443773	7.28017e-05	0.00473559	0.0153733	196	0.000233731	0.00357237	0.0654274	0.000272359	0.00351619	0.0774586	-0.000157563	0.00362974	-0.0434089	-0.000175369	0.00364956	-0.0480522	5.65662e-05	0.00410141	0.0137919
197	0.000235543	0.00358779	0.0656512	0.000274373	0.00353046	0.077716	-0.00022524	0.00512694	-0.0439325	-0.000196161	0.0051042	-0.0384313	8.33623e-05	0.00546688	0.0152486	197	0.000235543	0.00358779	0.0656512	0.000274373	0.00353046	0.077716	-0.000196047	0.00433572	-0.0452168	-0.000192587	0.00432406	-0.0445385	7.51172e-05	0.00475049	0.0158125	197	0.000235543	0.00358779	0.0656512	0.000274373	0.00353046	0.077716	-0.000156763	0.00364128	-0.0430516	-0.000175312	0.00366156	-0.0478792	5.86835e-05	0.0041159	0.0142577
198	0.000237048	0.00360383	0.0657767	0.000276424	0.00354463	0.0779839	-0.000226149	0.00514275	-0.0439743	-0.000195461	0.0051204	-0.0381731	8.52873e-05	0.00547861	0.0155673	198	0.000237048	0.00360383	0.0657767	0.000276424	0.00354463	0.0779839	-0.000195799	0.0043484	-0.0450279	-0.000191939	0.00433762	-0.04425	7.59033e-05	0.00476416	0.0159322	198	0.000237048	0.00360383	0.0657767	0.000276424	0.00354463	0.0779839	-0.000157597	0.00369502	-0.0426511	-0.000174049	0.00367285	-0.0473879	5.98023e-05	0.00412916	0.0144829
199	0.000239078	0.00362002	0.0660433	0.000278323	0.00355902	0.078202	-0.000227821	0.00515588	-0.0441866	-0.000193853	0.00513805	-0.0377288	8.65567e-05	0.00549369	0.0157556	199	0.000239078	0.00362002	0.0660433	0.000278323	0.00355902	0.078202	-0.000194586	0.00436101	-0.0446195	-0.000189784	0.00435147	-0.0436139	7.81991e-05	0.00477973	0.0163606	199	0.000239078	0.00362002	0.0660433	0.000278323	0.00355902	0.078202	-0.000154265	0.0036655	-0.0420856	-0.000172844	0.00368517	-0.0469025	6.21418e-05	0.00414209	0.0150025
200	0.000240763	0.0036364	0.0662093	0.000280343	0.00357374	0.0784454	-0.000226346	0.00517155	-0.0437677	-0.000195371	0.00515204	-0.0379211	8.81779e-05	0.00550418	0.0160202	200	0.000240763	0.0036364	0.0662093	0.000280343	0.00357374	0.0784454	-0.000193254	0.0043727	-0.0441955	-0.000189269	0.00436355	-0.0433752	8.04076e-05	0.00479281	0.0167767	200	0.000240763	0.0036364	0.0662093	0.000280343	0.00357374	0.0784454	-0.000153348	0.00367594	-0.0417167	-0.000171315	0.00369604	-0.0463509	6.36834e-05	0.00415475	0.0153279
201	0.000242207	0.00365267	0.0663095	0.000281786	0.00358845	0.0785259	-0.000224971	0.0051848	-0.0433904	-0.000193631	0.00517006	-0.0374524	8.91401e-05	0.00551691	0.0161576	201	0.000242207	0.00365267	0.0663095	0.000281786	0.00358845	0.0785259	-0.000193008	0.00438302	-0.0440355	-0.000188164	0.004376	-0.0429992	8.15927e-05	0.00480855	0.0169683	201	0.000242207	0.00365267	0.0663095	0.000281786	0.00358845	0.0785259	-0.000153182	0.00368648	-0.0415523	-0.000171075	0.00370897	-0.0461246	6.57873e-05	0.00416717	0.015787
202	0.000243546	0.00366853	0.066388	0.000283133	0.0036032	0.0785782	-0.000220248	0.00519962	-0.0423585	-0.000191304	0.00518464	-0.0368982	9.06864e-05	0.00552925	0.0164012	202	0.000243546	0.00366853	0.066388	0.000283133	0.0036032	0.0785782	-0.000190418	0.00439439	-0.043332	-0.0001863	0.00438709	-0.0424655	8.3301e-05	0.00482254	0.0172733	202	0.000243546	0.00366853	0.066388	0.000283133	0.0036032	0.0785782	-0.000152373	0.00369757	-0.0412088	-0.000170341	0.0037209	-0.0457796	6.68242e-05	0.00418047	0.0159848
203	0.000244727	0.00368446	0.0664215	0.000284211	0.00361803	0.0785541	-0.000220397	0.00521113	-0.0422935	-0.000187634	0.00520271	-0.0360647	9.34438e-05	0.0055433	0.0168571	203	0.000244727	0.00368446	0.0664215	0.000284211	0.00361803	0.0785541	-0.000189985	0.00440617	-0.043118	-0.000184939	0.00439982	-0.0420334	8.6376e-05	0.00483811	0.0178532	203	0.000244727	0.00368446	0.0664215	0.000284211	0.00361803	0.0785541	-0.000153144	0.00370859	-0.0412945	-0.000169526	0.00373225	-0.0454219	6.80887e-05	0.0041971	0.0162228
204	0.000245869	0.00369991	0.0664526	0.000285232	0.00363239	0.0785247	-0.000220157	0.00522444	-0.0421399	-0.000184976	0.00522237	-0.0354199	9.44066e-05	0.00555852	0.0169841	204	0.000245869	0.00369991	0.0664526	0.000285232	0.00363239	0.0785247	-0.000189289	0.00441824	-0.0428428	-0.000183391	0.00441465	-0.0415415	8.66964e-05	0.00485422	0.01786	204	0.000245869	0.00369991	0.0664526	0.000285232	0.00363239	0.0785247	-0.000151917	0.00371901	-0.0408487	-0.000168167	0.00374247	-0.0449346	6.96097e-05	0.00421124	0.0165295
205	0.000247109	0.0037153	0.066511	0.000286461	0.00364663	0.0785552	-0.000222067	0.00523975	-0.0423813	-0.000183117	0.00523955	-0.0349491	9.54989e-05	0.00557269	0.017137	205	0.000247109	0.0037153	0.066511	0.000286461	0.00364663	0.0785552	-0.000189259	0.00443276	-0.0426956	-0.000182554	0.00442907	-0.0412173	8.78443e-05	0.00486694	0.0180492	205	0.000247109	0.0037153	0.066511	0.000286461	0.00364663	0.0785552	-0.000151922	0.00373069	-0.0407221	-0.00016776	0.00375511	-0.0446752	6.98914e-05	0.00422627	0.0165374
206	0.000248214	0.00373111	0.0665257	0.000287858	0.00366096	0.0786291	-0.000223224	0.00525224	-0.0425008	-0.00018275	0.00525659	-0.0347658	9.5018e-05	0.00558947	0.0169995	206	0.000248214	0.00373111	0.0665257	0.000287858	0.00366096	0.0786291	-0.000190124	0.00444534	-0.0427693	-0.000180978	0.00444393	-0.0407248	8.70237e-05	0.00488406	0.0178179	206	0.000248214	0.00373111	0.0665257	0.000287858	0.00366096	0.0786291	-0.000150634	0.00374146	-0.0402608	-0.000167874	0.00376597	-0.0445765	7.01373e-05	0.00424166	0.0165354
207	0.000249314	0.00374705	0.0665361	0.000288983	0.00367562	0.0786215	-0.00022559	0.00526599	-0.042839	-0.000183525	0.00526947	-0.034828	9.46712e-05	0.0056115	0.0168709	207	0.000249314	0.00374705	0.0665361	0.000288983	0.00367562	0.0786215	-0.000191763	0.00445851	-0.0430106	-0.000181314	0.0044576	-0.0406752	8.72879e-05	0.00490179	0.0178074	207	0.000249314	0.00374705	0.0665361	0.000288983	0.00367562	0.0786215	-0.000151324	0.00375341	-0.0403165	-0.000167516	0.00377627	-0.0443602	6.98571e-05	0.00425785	0.0164067
208	0.000250532	0.00376292	0.0665791	0.000290433	0.00369097	0.0786874	-0.000225222	0.00528336	-0.0426286	-0.000182204	0.00528313	-0.0344879	9.84105e-05	0.00563031	0.0174787	208	0.000250532	0.00376292	0.0665791	0.000290433	0.00369097	0.0786874	-0.000189951	0.00447083	-0.0424868	-0.000180342	0.00446812	-0.040362	8.90116e-05	0.00491736	0.0181015	208	0.000250532	0.00376292	0.0665791	0.000290433	0.00369097	0.0786874	-0.000149695	0.00376696	-0.0397391	-0.000166505	0.00378661	-0.0439722	7.19739e-05	0.00427195	0.016848
209	0.000251868	0.00377892	0.0666509	0.000291838	0.00370667	0.0787332	-0.00022604	0.00530026	-0.042647	-0.000182849	0.00530002	-0.0344997	0.000100561	0.00564167	0.0178246	209	0.000251868	0.00377892	0.0666509	0.000291838	0.00370667	0.0787332	-0.000188915	0.00448683	-0.0421044	-0.000180516	0.00448093	-0.0402853	9.05961e-05	0.00492896	0.0183804	209	0.000251868	0.00377892	0.0666509	0.000291838	0.00370667	0.0787332	-0.000148637	0.00378185	-0.0393026	-0.000165711	0.00379986	-0.0436097	7.31114e-05	0.00428445	0.0170644
210	0.000252879	0.00379545	0.066627	0.000293282	0.00372264	0.0787833	-0.000226789	0.00531936	-0.0426346	-0.000182081	0.0053125	-0.0342741	0.000102709	0.00565547	0.0181609	210	0.000252879	0.00379545	0.066627	0.000293282	0.00372264	0.0787833	-0.000188361	0.00450359	-0.0418245	-0.000179194	0.00449253	-0.0398872	9.27892e-05	0.00494153	0.0187774	210	0.000252879	0.00379545	0.066627	0.000293282	0.00372264	0.0787833	-0.000146913	0.00379685	-0.0386935	-0.000165227	0.00381306	-0.0433319	7.47718e-05	0.00429702	0.0174009
211	0.000254359	0.00381108	0.066742	0.0002948	0.0037385	0.0788551	-0.000229052	0.00533771	-0.0429121	-0.000181133	0.00532792	-0.033997	0.000104708	0.00567124	0.018463	211	0.000254359	0.00381108	0.066742	0.0002948	0.0037385	0.0788551	-0.000188373	0.00452002	-0.0416752	-0.000178415	0.00450519	-0.0396022	9.50739e-05	0.00495612	0.0191831	211	0.000254359	0.00381108	0.066742	0.0002948	0.0037385	0.0788551	-0.000146425	0.00381038	-0.0384278	-0.000164738	0.00382657	-0.043051	7.67326e-05	0.00431261	0.0177926
212	0.000255256	0.00382804	0.0666806	0.000296128	0.00375481	0.0788664	-0.000227395	0.00535006	-0.0425033	-0.000182281	0.00534648	-0.0340937	0.000104972	0.00568822	0.0184543	212	0.000255256	0.00382804	0.0666806	0.000296128	0.00375481	0.0788664	-0.000187178	0.00453161	-0.0413049	-0.0001798	0.00452008	-0.039778	9.50996e-05	0.00497084	0.0191315	212	0.000255256	0.00382804	0.0666806	0.000296128	0.00375481	0.0788664	-0.000145725	0.00382249	-0.0381231	-0.000164567	0.00383891	-0.0428682	7.72853e-05	0.00432628	0.0178642
213	0.000256659	0.00384263	0.0667926	0.000297366	0.00377031	0.0788703	-0.000225972	0.00536534	-0.042117	-0.000183113	0.00536428	-0.0341356	0.000106011	0.00570579	0.0185795	213	0.000256659	0.00384263	0.0667926	0.000297366	0.00377031	0.0788703	-0.00018502	0.00454664	-0.0406937	-0.000180602	0.00453606	-0.0398147	9.62126e-05	0.00498643	0.0192949	213	0.000256659	0.00384263	0.0667926	0.000297366	0.00377031	0.0788703	-0.00014542	0.00383671	-0.0379022	-0.000164696	0.00385316	-0.042743	7.67895e-05	0.00434116	0.0176887
214	0.000257811	0.00385757	0.0668324	0.00029873	0.00378519	0.0789208	-0.000225575	0.00537763	-0.0419469	-0.000184715	0.00538169	-0.0343229	0.000107645	0.00571545	0.018834	214	0.000257811	0.00385757	0.0668324	0.00029873	0.00378519	0.0789208	-0.000184653	0.00455791	-0.0405126	-0.000182179	0.00454992	-0.04004	9.65476e-05	0.00499966	0.0193108	214	0.000257811	0.00385757	0.0668324	0.00029873	0.00378519	0.0789208	-0.000145411	0.00384823	-0.0377864	-0.000164806	0.00386702	-0.0426183	7.68245e-05	0.00435611	0.017636
215	0.000258751	0.00387356	0.0667992	0.000299977	0.00380093	0.0789218	-0.000224219	0.00539037	-0.0415962	-0.000185192	0.00540001	-0.0342948	0.000110403	0.00572959	0.019269	215	0.000258751	0.00387356	0.0667992	0.000299977	0.00380093	0.0789218	-0.000183822	0.00456983	-0.0402251	-0.000181031	0.00456618	-0.039646	9.80516e-05	0.005012	0.0195634	215	0.000258751	0.00387356	0.0667992	0.000299977	0.00380093	0.0789218	-0.000145313	0.00385871	-0.0376584	-0.000164663	0.00388017	-0.0424369	7.79094e-05	0.00436865	0.0178337
216	0.000260094	0.00388946	0.0668715	0.000301662	0.00381701	0.0790309	-0.000224913	0.00540689	-0.0415974	-0.000184067	0.00541309	-0.034004	0.000112892	0.00574644	0.0196456	216	0.000260094	0.00388946	0.0668715	0.000301662	0.00381701	0.0790309	-0.000183824	0.00458307	-0.0401094	-0.000180458	0.00457985	-0.0394025	9.96982e-05	0.00502711	0.0198321	216	0.000260094	0.00388946	0.0668715	0.000301662	0.00381701	0.0790309	-0.000144683	0.0038715	-0.0373713	-0.000164132	0.00389289	-0.0421619	7.93098e-05	0.00438136	0.0181016
217	0.000261064	0.00390527	0.0668492	0.00030298	0.00383298	0.0790454	-0.000224439	0.00542246	-0.0413906	-0.000184256	0.00542563	-0.0339602	0.000116182	0.0057601	0.0201701	217	0.000261064	0.00390527	0.0668492	0.00030298	0.00383298	0.0790454	-0.000183344	0.00459655	-0.0398874	-0.000180618	0.00459374	-0.0393183	0.000102058	0.0050402	0.0202489	217	0.000261064	0.00390527	0.0668492	0.00030298	0.00383298	0.0790454	-0.000144107	0.00388245	-0.0371176	-0.000163125	0.00390569	-0.041766	8.08873e-05	0.00439343	0.018411
218	0.000261918	0.00392015	0.0668132	0.000304326	0.0038482	0.0790826	-0.000224784	0.00543499	-0.0413587	-0.000184805	0.00543623	-0.0339951	0.000119447	0.0057732	0.02069	218	0.000261918	0.00392015	0.0668132	0.000304326	0.0038482	0.0790826	-0.000182893	0.00460797	-0.0396906	-0.000179359	0.00460554	-0.0389441	0.000104641	0.00505332	0.0207074	218	0.000261918	0.00392015	0.0668132	0.000304326	0.0038482	0.0790826	-0.000144068	0.00389121	-0.0370239	-0.000162896	0.00391677	-0.0415894	8.27268e-05	0.00440729	0.0187704
219	0.000262788	0.00393526	0.0667779	0.000305326	0.00386343	0.0790296	-0.000226695	0.00545102	-0.0415876	-0.000183819	0.00545034	-0.0337261	0.000122489	0.00579122	0.0211508	219	0.000262788	0.00393526	0.0667779	0.000305326	0.00386343	0.0790296	-0.000184492	0.00462006	-0.0399329	-0.000179231	0.0046175	-0.0388156	0.000107536	0.00506811	0.0212182	219	0.000262788	0.00393526	0.0667779	0.000305326	0.00386343	0.0790296	-0.000147477	0.00394153	-0.0374163	-0.000161811	0.00392901	-0.0411837	8.38268e-05	0.00442311	0.018952
220	0.000264106	0.00394901	0.0668791	0.000306604	0.00387813	0.0790599	-0.000225789	0.00546296	-0.0413309	-0.000183461	0.00546053	-0.0335977	0.000125609	0.00580999	0.0216196	220	0.000264106	0.00394901	0.0668791	0.000306604	0.00387813	0.0790599	-0.000184325	0.0046302	-0.0398093	-0.000179463	0.00462853	-0.0387731	0.000110762	0.00508413	0.0217859	220	0.000264106	0.00394901	0.0668791	0.000306604	0.00387813	0.0790599	-0.000145137	0.00391573	-0.037065	-0.000161776	0.00394001	-0.0410598	8.59448e-05	0.00443802	0.0193656
221	0.00026478	0.00396335	0.0668072	0.000307372	0.00389254	0.0789643	-0.000227188	0.00547567	-0.0414904	-0.000184794	0.00547174	-0.0337724	0.000125574	0.00582318	0.0215645	221	0.00026478	0.00396335	0.0668072	0.000307372	0.00389254	0.0789643	-0.000183923	0.00464116	-0.0396288	-0.000179559	0.00463705	-0.0387226	0.000111708	0.00509951	0.0219056	221	0.00026478	0.00396335	0.0668072	0.000307372	0.00389254	0.0789643	-0.000145294	0.00392695	-0.0369992	-0.000161907	0.0039513	-0.0409757	8.78426e-05	0.00445237	0.0197294
222	0.000265238	0.00397819	0.0666731	0.000308273	0.00390715	0.0788996	-0.000223664	0.00548858	-0.0407508	-0.000186851	0.00548632	-0.0340575	0.00012702	0.00584018	0.0217493	222	0.000265238	0.00397819	0.0666731	0.000308273	0.00390715	0.0788996	-0.000187521	0.00478217	-0.0392125	-0.000180642	0.00464945	-0.0388525	0.000113123	0.00511737	0.0221057	222	0.000265238	0.00397819	0.0666731	0.000308273	0.00390715	0.0788996	-0.000147921	0.00397639	-0.0371999	-0.000161492	0.00396314	-0.0407484	8.72452e-05	0.00450086	0.0193841
223	0.000266445	0.00399169	0.0667499	0.000309581	0.00392144	0.0789457	-0.000222928	0.00550132	-0.0405226	-0.000187299	0.00550259	-0.0340383	0.000126729	0.00585629	0.0216398	223	0.000266445	0.00399169	0.0667499	0.000309581	0.00392144	0.0789457	-0.000181716	0.00466517	-0.0389517	-0.000179457	0.00466295	-0.0384857	0.000113218	0.00513285	0.0220576	223	0.000266445	0.00399169	0.0667499	0.000309581	0.00392144	0.0789457	-0.000145126	0.00394929	-0.0367473	-0.000161724	0.00397451	-0.0406903	8.81374e-05	0.00451504	0.0195208
224	0.000267698	0.00400545	0.0668333	0.000311117	0.00393538	0.0790565	-0.000221742	0.00551479	-0.0402085	-0.00018806	0.00551574	-0.0340951	0.000126961	0.00587679	0.0216037	224	0.000267698	0.00400545	0.0668333	0.000311117	0.00393538	0.0790565	-0.000182545	0.00467553	-0.0390426	-0.000180161	0.00467365	-0.0385482	0.000114114	0.0051479	0.0221671	224	0.000267698	0.00400545	0.0668333	0.000311117	0.00393538	0.0790565	-0.000145397	0.00395997	-0.0367167	-0.000162071	0.00398531	-0.0406671	8.81567e-05	0.00452963	0.0194622
225	0.000268775	0.00401912	0.0668742	0.000312408	0.00394892	0.0791122	-0.000223824	0.00552937	-0.0404792	-0.000188344	0.00553182	-0.0340474	0.00012732	0.00589324	0.0216044	225	0.000268775	0.00401912	0.0668742	0.000312408	0.00394892	0.0791122	-0.000185063	0.00469058	-0.0394541	-0.000180279	0.00468642	-0.0384684	0.00011433	0.00516308	0.0221438	225	0.000268775	0.00401912	0.0668742	0.000312408	0.00394892	0.0791122	-0.00015004	0.00400876	-0.0374279	-0.000163083	0.00399826	-0.0407886	9.15975e-05	0.00451028	0.0203086
226	0.000270183	0.00403366	0.066982	0.000314069	0.00396378	0.0792349	-0.000224148	0.00554143	-0.0404495	-0.00019034	0.00554814	-0.034307	0.00012893	0.00591277	0.0218054	226	0.000270183	0.00403366	0.066982	0.000314069	0.00396378	0.0792349	-0.00018467	0.0047036	-0.0392613	-0.00018154	0.0047002	-0.038624	0.000115816	0.00518065	0.0223554	226	0.000270183	0.00403366	0.066982	0.000314069	0.00396378	0.0792349	-0.000147628	0.00398401	-0.0370552	-0.000163614	0.0040106	-0.0407955	9.25725e-05	0.00452567	0.020455
227	0.000271898	0.00404816	0.0671659	0.000315778	0.00397868	0.0793675	-0.000225529	0.00555569	-0.0405943	-0.000192681	0.00556603	-0.0346172	0.000129634	0.00593841	0.0218297	227	0.000271898	0.00404816	0.0671659	0.000315778	0.00397868	0.0793675	-0.000185258	0.00471625	-0.0392808	-0.000182558	0.00471678	-0.0387039	0.000116746	0.00520195	0.0224428	227	0.000271898	0.00404816	0.0671659	0.000315778	0.00397868	0.0793675	-0.000147148	0.00399527	-0.0368306	-0.000164377	0.00402341	-0.0408552	9.41232e-05	0.00454472	0.0207104
228	0.000273902	0.00406261	0.0674204	0.000317843	0.00399357	0.0795886	-0.000227599	0.00556971	-0.0408636	-0.000194173	0.00558187	-0.0347864	0.000137471	0.00596081	0.0230625	228	0.000273902	0.00406261	0.0674204	0.000317843	0.00399357	0.0795886	-0.000184895	0.0047284	-0.0391031	-0.000183097	0.00472991	-0.0387104	0.000121181	0.00522353	0.023199	228	0.000273902	0.00406261	0.0674204	0.000317843	0.00399357	0.0795886	-0.000146699	0.00400642	-0.0366161	-0.000164321	0.004036	-0.0407139	9.71714e-05	0.00456306	0.0212952
229	0.000276076	0.00407623	0.0677282	0.00032015	0.00400695	0.0798987	-0.000229701	0.00558297	-0.0411431	-0.000192255	0.00559465	-0.0343641	0.000141368	0.00598277	0.0236292	229	0.000276076	0.00407623	0.0677282	0.00032015	0.00400695	0.0798987	-0.000183922	0.00473911	-0.0388093	-0.000181069	0.00474206	-0.0381837	0.000124235	0.00524048	0.0237068	229	0.000276076	0.00407623	0.0677282	0.00032015	0.00400695	0.0798987	-0.000145414	0.00401976	-0.0361749	-0.000164513	0.0040489	-0.0406315	9.67673e-05	0.00461038	0.020989
230	0.000278524	0.00409034	0.0680931	0.000322808	0.00402124	0.0802758	-0.000229393	0.00560204	-0.0409481	-0.000191386	0.00561096	-0.0341092	0.000144883	0.00600368	0.0241324	230	0.000278524	0.00409034	0.0680931	0.000322808	0.00402124	0.0802758	-0.000182781	0.00475431	-0.0384454	-0.000178995	0.00475563	-0.0376387	0.000127511	0.00525674	0.0242568	230	0.000278524	0.00409034	0.0680931	0.000322808	0.00402124	0.0802758	-0.000144833	0.00403273	-0.0359142	-0.000163677	0.00406126	-0.0403021	0.000101854	0.00459572	0.0221628
231	0.000280742	0.00410403	0.0684064	0.000325135	0.00403569	0.0805648	-0.000229325	0.00561849	-0.0408161	-0.000190032	0.00562592	-0.0337779	0.000146521	0.00602112	0.0243345	231	0.000280742	0.00410403	0.0684064	0.000325135	0.00403569	0.0805648	-0.000182745	0.0047673	-0.0383331	-0.00017748	0.00477243	-0.0371887	0.000128388	0.00527394	0.0243438	231	0.000280742	0.00410403	0.0684064	0.000325135	0.00403569	0.0805648	-0.000143584	0.0040471	-0.0354782	-0.000162103	0.0040737	-0.0397925	0.000103446	0.00460994	0.0224398
232	0.000282757	0.0041178	0.068667	0.000327332	0.00405024	0.0808181	-0.000230066	0.00563683	-0.0408148	-0.000190091	0.00564542	-0.0336716	0.000148374	0.00604047	0.0245633	232	0.000282757	0.0041178	0.068667	0.000327332	0.00405024	0.0808181	-0.000183588	0.00478151	-0.0383955	-0.000176909	0.00479101	-0.0369253	0.000129396	0.00528908	0.0244647	232	0.000282757	0.0041178	0.068667	0.000327332	0.00405024	0.0808181	-0.000142508	0.00406071	-0.0350943	-0.000161343	0.00408712	-0.039476	0.000105384	0.00462466	0.0227873
233	0.000284575	0.00413198	0.0688715	0.000329051	0.004065	0.0809473	-0.000228495	0.00565705	-0.0403913	-0.000194167	0.00566522	-0.0342735	0.000153432	0.00605934	0.0253215	233	0.000284575	0.00413198	0.0688715	0.000329051	0.004065	0.0809473	-0.000184204	0.00480014	-0.0383748	-0.000176476	0.00480686	-0.0367133	0.000134411	0.00530439	0.0253395	233	0.000284575	0.00413198	0.0688715	0.000329051	0.004065	0.0809473	-0.000142505	0.00407548	-0.0349663	-0.000160342	0.00410084	-0.0390998	0.000109455	0.00463936	0.0235927
234	0.000286389	0.00414688	0.0690614	0.00033072	0.00408002	0.0810583	-0.00022715	0.00567788	-0.0400061	-0.000193839	0.00568392	-0.034103	0.000156094	0.00607766	0.0256832	234	0.000286389	0.00414688	0.0690614	0.00033072	0.00408002	0.0810583	-0.000183227	0.00481672	-0.0380398	-0.000176443	0.00482242	-0.0365881	0.000135171	0.00532163	0.0254002	234	0.000286389	0.00414688	0.0690614	0.00033072	0.00408002	0.0810583	-0.000141634	0.0040876	-0.0346496	-0.000160205	0.00411257	-0.038955	0.000110655	0.00465321	0.0237804
235	0.000288254	0.00416188	0.0692606	0.000332357	0.00409451	0.0811713	-0.000226839	0.00569729	-0.0398152	-0.00019071	0.00569929	-0.033462	0.000157472	0.00609585	0.0258327	235	0.000288254	0.00416188	0.0692606	0.000332357	0.00409451	0.0811713	-0.000182293	0.00483333	-0.0377158	-0.000176569	0.00483943	-0.0364855	0.00013722	0.00534183	0.0256878	235	0.000288254	0.00416188	0.0692606	0.000332357	0.00409451	0.0811713	-0.000140652	0.00410243	-0.0342851	-0.000158689	0.00412694	-0.0384519	0.000112529	0.00466968	0.0240979
236	0.000290063	0.00417683	0.0694458	0.000334004	0.00410897	0.0812864	-0.000224172	0.00571341	-0.0392362	-0.000190909	0.00571858	-0.0333841	0.000158658	0.00611273	0.0259553	236	0.000290063	0.00417683	0.0694458	0.000334004	0.00410897	0.0812864	-0.000180795	0.00484802	-0.0372925	-0.000175461	0.00485702	-0.0361252	0.000138836	0.00536011	0.0259018	236	0.000290063	0.00417683	0.0694458	0.000334004	0.00410897	0.0812864	-0.000139658	0.00411745	-0.0339186	-0.000158134	0.00414151	-0.0381826	0.000115052	0.00468743	0.0245447
237	0.00029198	0.00419294	0.0696361	0.00033576	0.00412439	0.0814083	-0.000219504	0.00573168	-0.0382967	-0.000188483	0.00573799	-0.0328483	0.000156309	0.00613212	0.0254902	237	0.00029198	0.00419294	0.0696361	0.00033576	0.00412439	0.0814083	-0.000177716	0.00486353	-0.0365406	-0.000175262	0.00487599	-0.0359439	0.000138889	0.00538002	0.0258157	237	0.00029198	0.00419294	0.0696361	0.00033576	0.00412439	0.0814083	-0.000138831	0.00413186	-0.0336001	-0.000158329	0.00415821	-0.0380763	0.000114878	0.004733	0.0242716
238	0.000293996	0.00420868	0.0698547	0.000337648	0.0041399	0.0815594	-0.000217246	0.00574843	-0.0377922	-0.000186019	0.00576161	-0.032286	0.00015958	0.00615609	0.0259223	238	0.000293996	0.00420868	0.0698547	0.000337648	0.0041399	0.0815594	-0.000175979	0.00487909	-0.036068	-0.000174897	0.00489595	-0.0357228	0.00014213	0.00540112	0.0263149	238	0.000293996	0.00420868	0.0698547	0.000337648	0.0041399	0.0815594	-0.00013746	0.00414578	-0.0331565	-0.000157098	0.0041739	-0.0376381	0.000119968	0.00472103	0.0254114
239	0.000295987	0.00422438	0.0700664	0.000339292	0.00415537	0.0816515	-0.000216717	0.00576345	-0.0376019	-0.000185284	0.00578061	-0.0320526	0.000163508	0.00617167	0.0264933	239	0.000295987	0.00422438	0.0700664	0.000339292	0.00415537	0.0816515	-0.00017506	0.00489646	-0.0357525	-0.00017362	0.00491301	-0.0353389	0.000145132	0.005417	0.026792	239	0.000295987	0.00422438	0.0700664	0.000339292	0.00415537	0.0816515	-0.000135856	0.00415886	-0.0326667	-0.000159907	0.00422435	-0.0378535	0.00012274	0.0047379	0.025906
240	0.000297869	0.00424001	0.070252	0.000340928	0.0041706	0.0817455	-0.000217768	0.00578216	-0.037662	-0.000182721	0.00580055	-0.0315007	0.000166578	0.00619047	0.0269088	240	0.000297869	0.00424001	0.070252	0.000340928	0.0041706	0.0817455	-0.00017437	0.00491474	-0.035479	-0.000170567	0.00493162	-0.0345864	0.00014687	0.00543555	0.0270203	240	0.000297869	0.00424001	0.070252	0.000340928	0.0041706	0.0817455	-0.000134355	0.00417529	-0.0321788	-0.000156257	0.00420551	-0.0371554	0.000125371	0.00475452	0.0263688

[truncated: 7 more sheets: FigS1, FigS2, FigS3, FigS4, FigS5, FigS6, FigS7]
